# Supplementary material
Source: PubMed Central journal article supplement (PMC7460901)
Supplement: ASN.2019070696SupplementaryData1.pdf [file ASN.2019070696SupplementaryData1.pdf]

## **Table of Contents for Supplemental Material:**

1. Supplemental Figure 1. Laser Capture of Glomeruli Excludes Bowman's Capsule.  
Page 3.
2. Supplemental Figure 2. Comparison of ECM Protein Enrichment by Extraction Method.  
Page 4.
3. Supplemental Figure 3. Immunohistochemistry of cFSGS, FSGS-NOS, and NC for Selected Glomerular ECM Proteins.  
Page 5-10.
4. Supplemental Table 1. All Glomerular Proteins Identified from cFSGS, FSGS-NOS, and NC. (Mass Spectrometry data contained in a supplemental spreadsheet).  
Pages 11-56.
5. Supplemental Table 2. Gene Names of Glomerular ECM Proteins Identified in NC, FSGS-NOS, and cFSGS  
Pages 57-60.
6. Supplemental Table 3. Relative Abundance of Glomerular ECM Proteins.  
Pages 61-68.
7. Supplemental Table 4. Glomerular Cathepsin and Annexin A3 Staining of Various Proteinuric Glomerular Diseases.  
Page 69.
8. Supplemental Table 5. Comparison of Urinary Excretion of ECM Proteins.  
Pages 70-73. (Mass Spectrometry data contained in a supplemental spreadsheet).
9. Supplemental Table 6. Peptides derived from ECM Proteins Showing Increased Urine Excretion. (Mass Spectrometry data contained in a supplemental spreadsheet).  
Page 74.

10. Supplemental Table 7. Proteases Associated with Urine ECM Peptides.

Page 75.

Supplemental Figure 1.

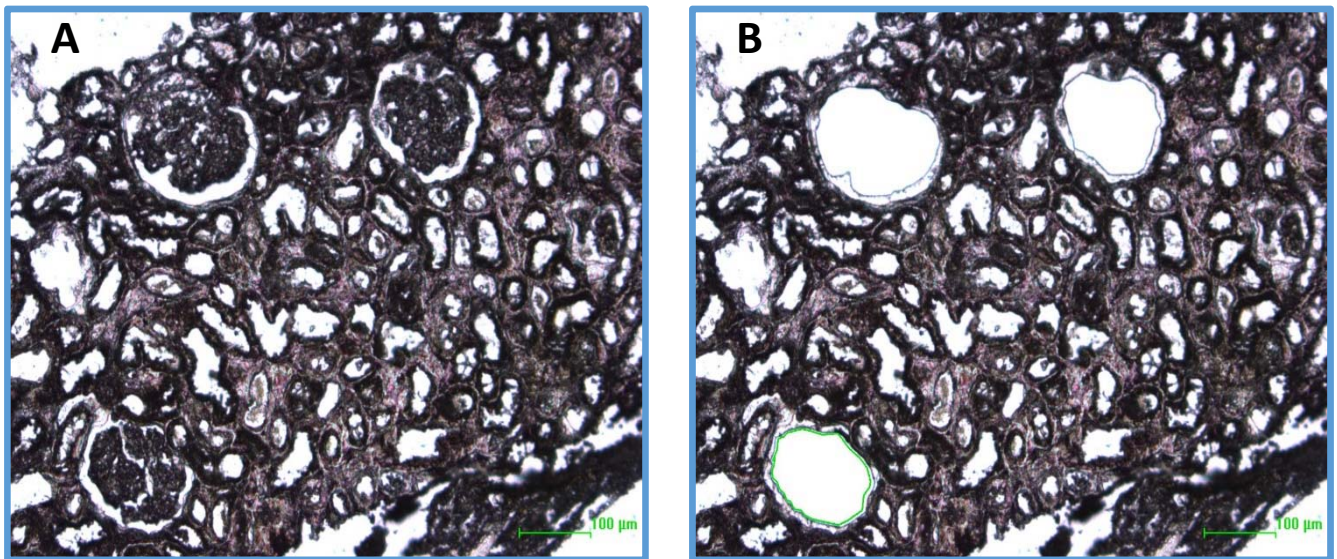

Images of glomeruli collected by laser capture microdissection (LCMD). Panel A, image taken from a region of the kidney biopsy prior to dissection of glomeruli by LCMD. Panel B, image taken from the same region as in panel A, demonstrating outlines of dissection for each glomerulus. Panel B also demonstrates that Bowman's capsule was not dissected with the captured glomeruli and is still intact/retained in the section.

Supplemental Figure 2.

A.

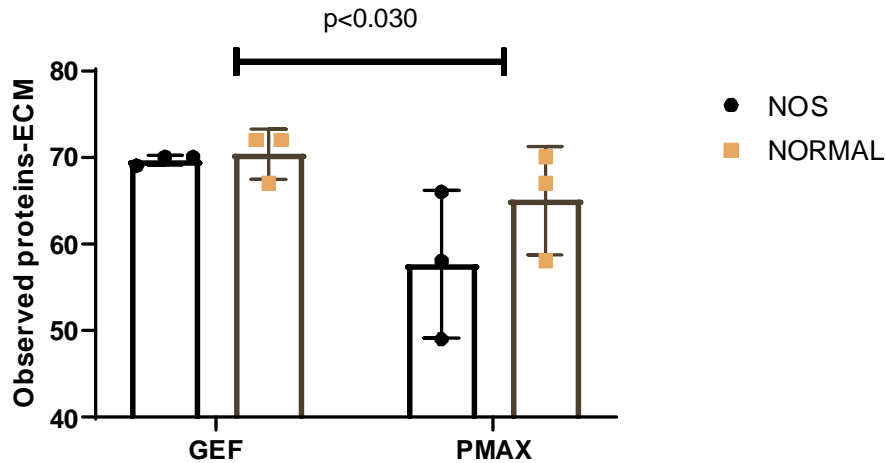

B.

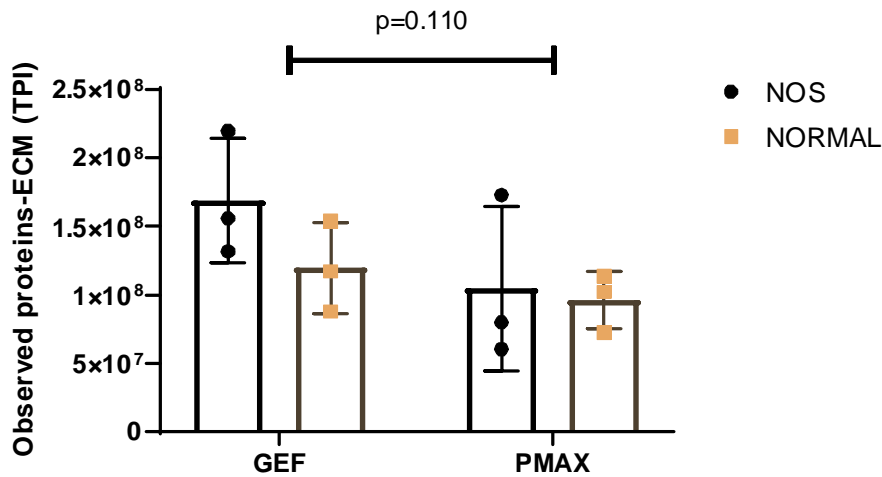

Plots of proteomic analysis of glomerular ECM enrichment. Panel A shows the number of ECM proteins identified from isolated glomerular sections from normal or FSGS-NOS biopsies by 0.1% Protease MAX alone (PMAX) or sequential decellularization with 25 mM  $\text{NH}_4\text{OH}$ / 0.5% TritonX-100 followed protein extraction by PMAX. Sequential ECM enrichment significantly increased the number of ECM proteins identified. Panel B shows the total quantity of ECM proteins, expressed as total precursor intensity (TPI), for each extraction methods for normal and FSGS-NOS glomeruli. The quantity of ECM proteins identified was greater for sequential EMC enrichment, although the difference did not reach statistical significance for the 3 samples in each group.

Supplemental Figure 3A..

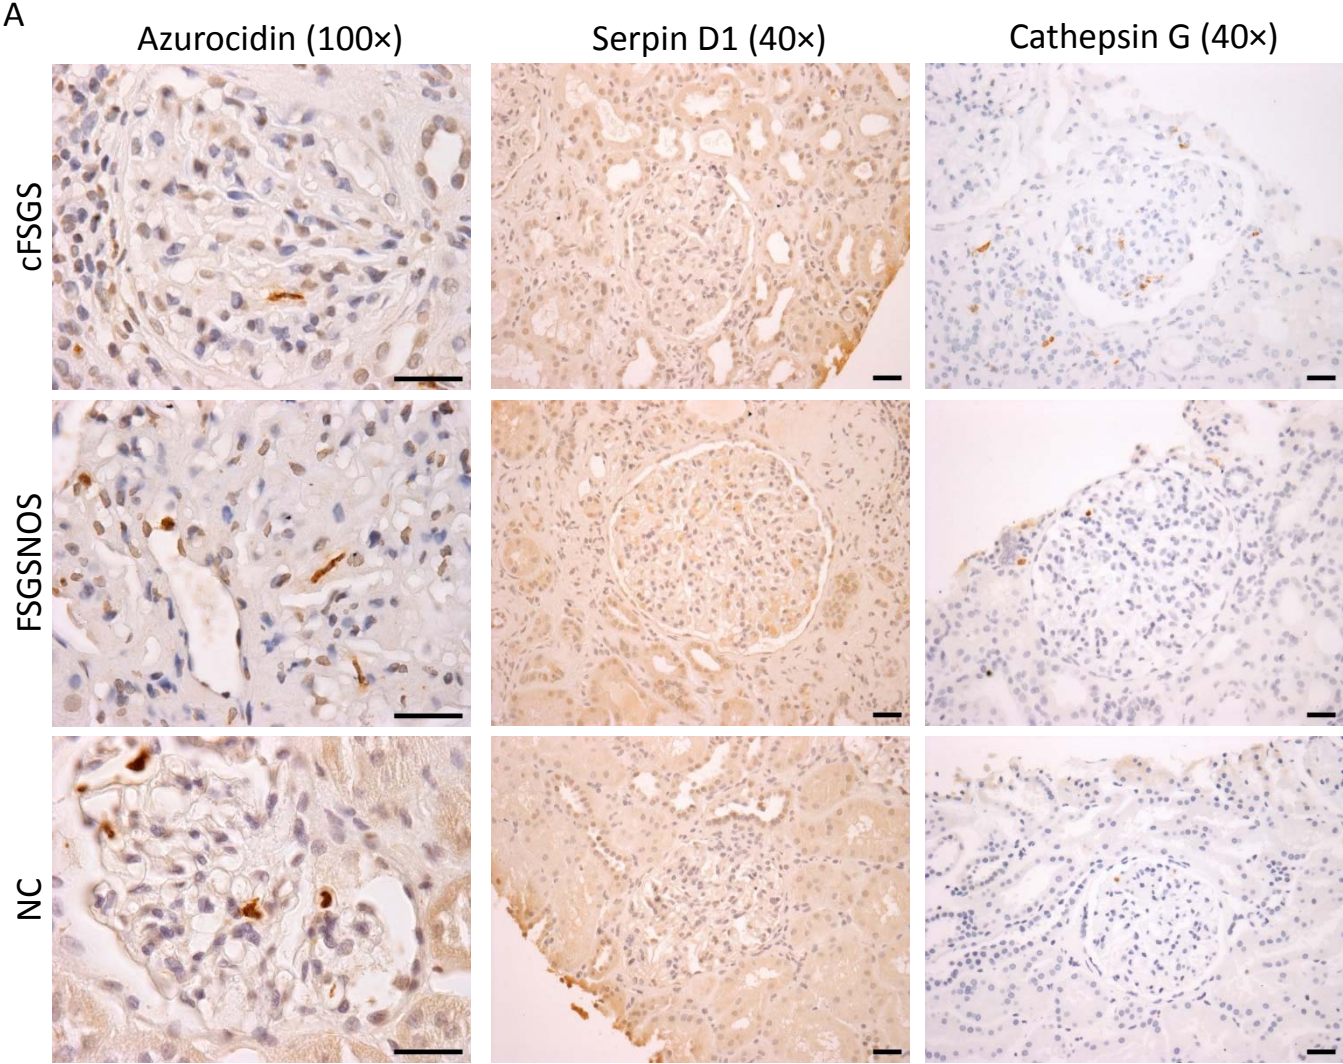

Supplemental Figure 3B.

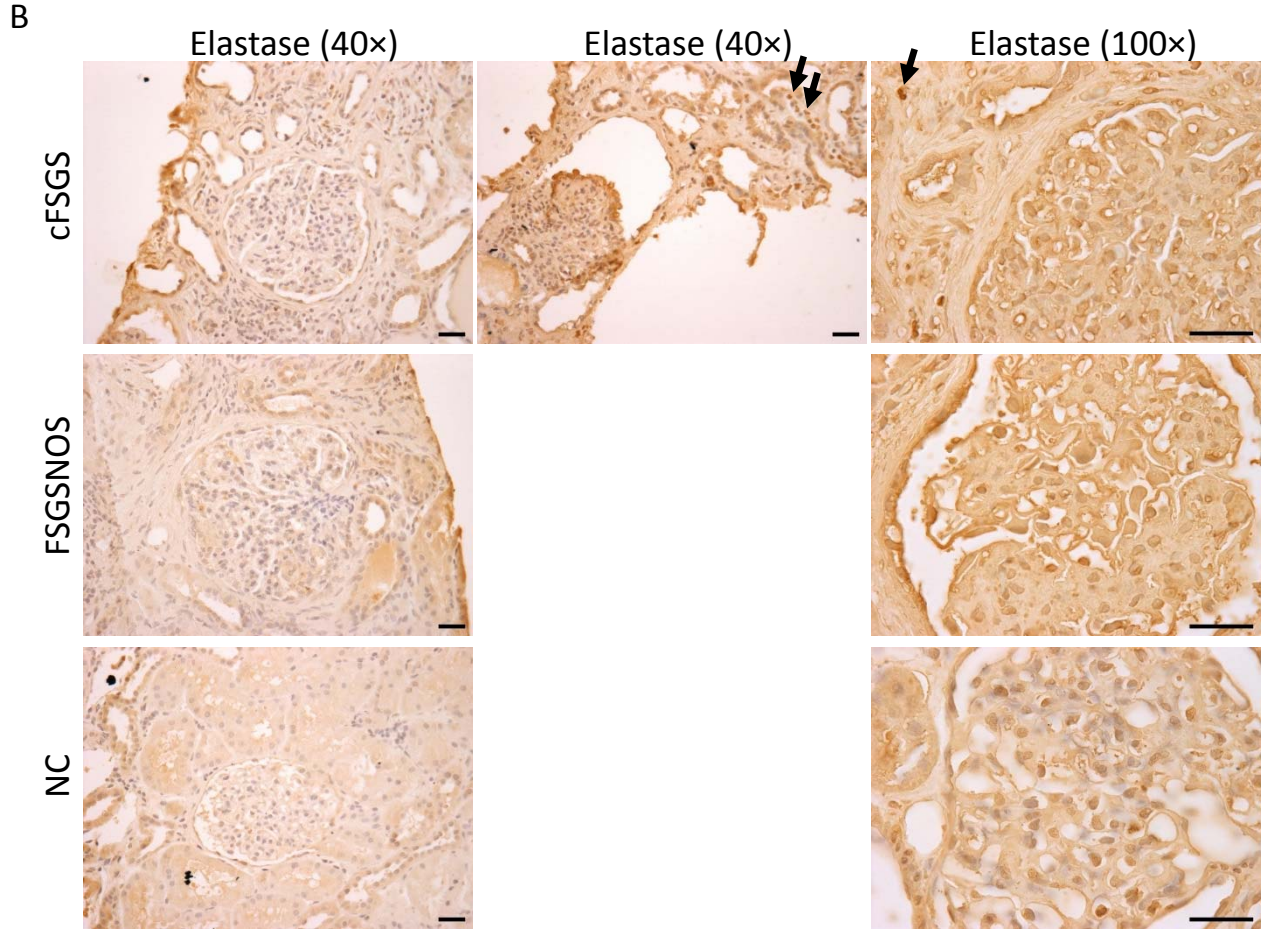

Supplemental Figure 3C.

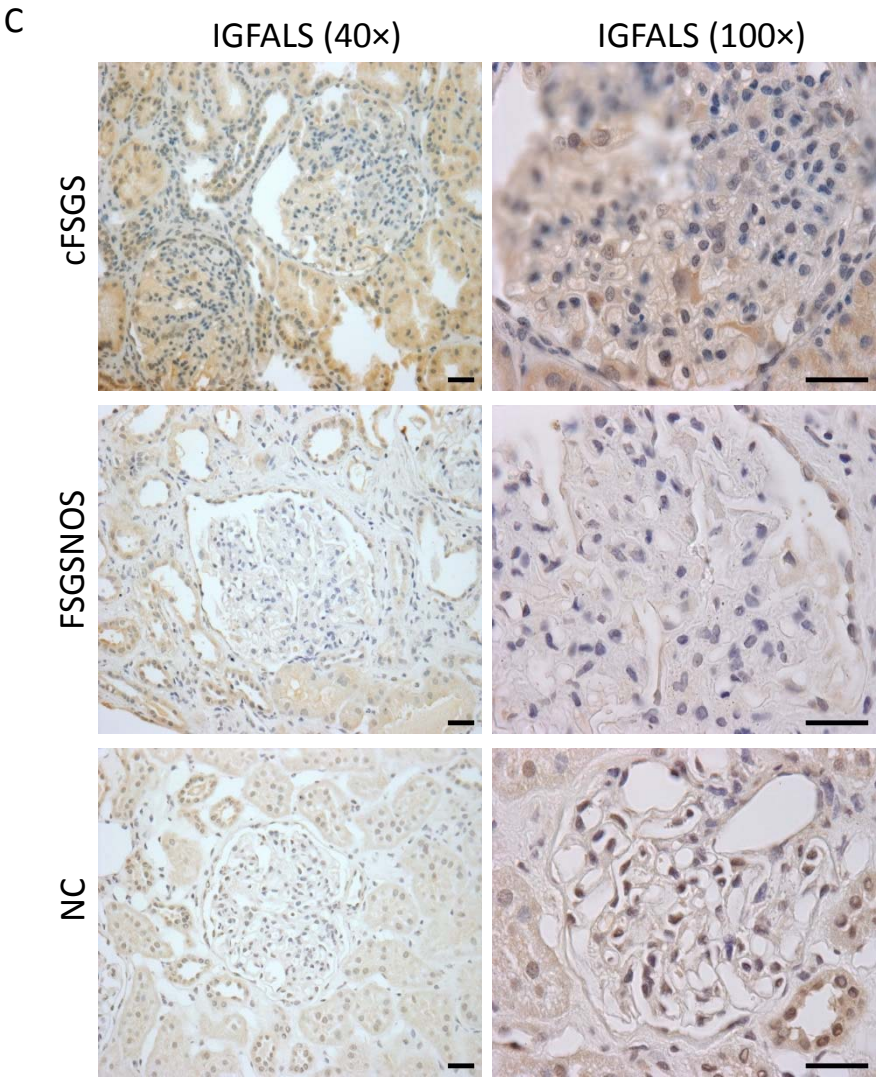

Supplemental Figure 3D.

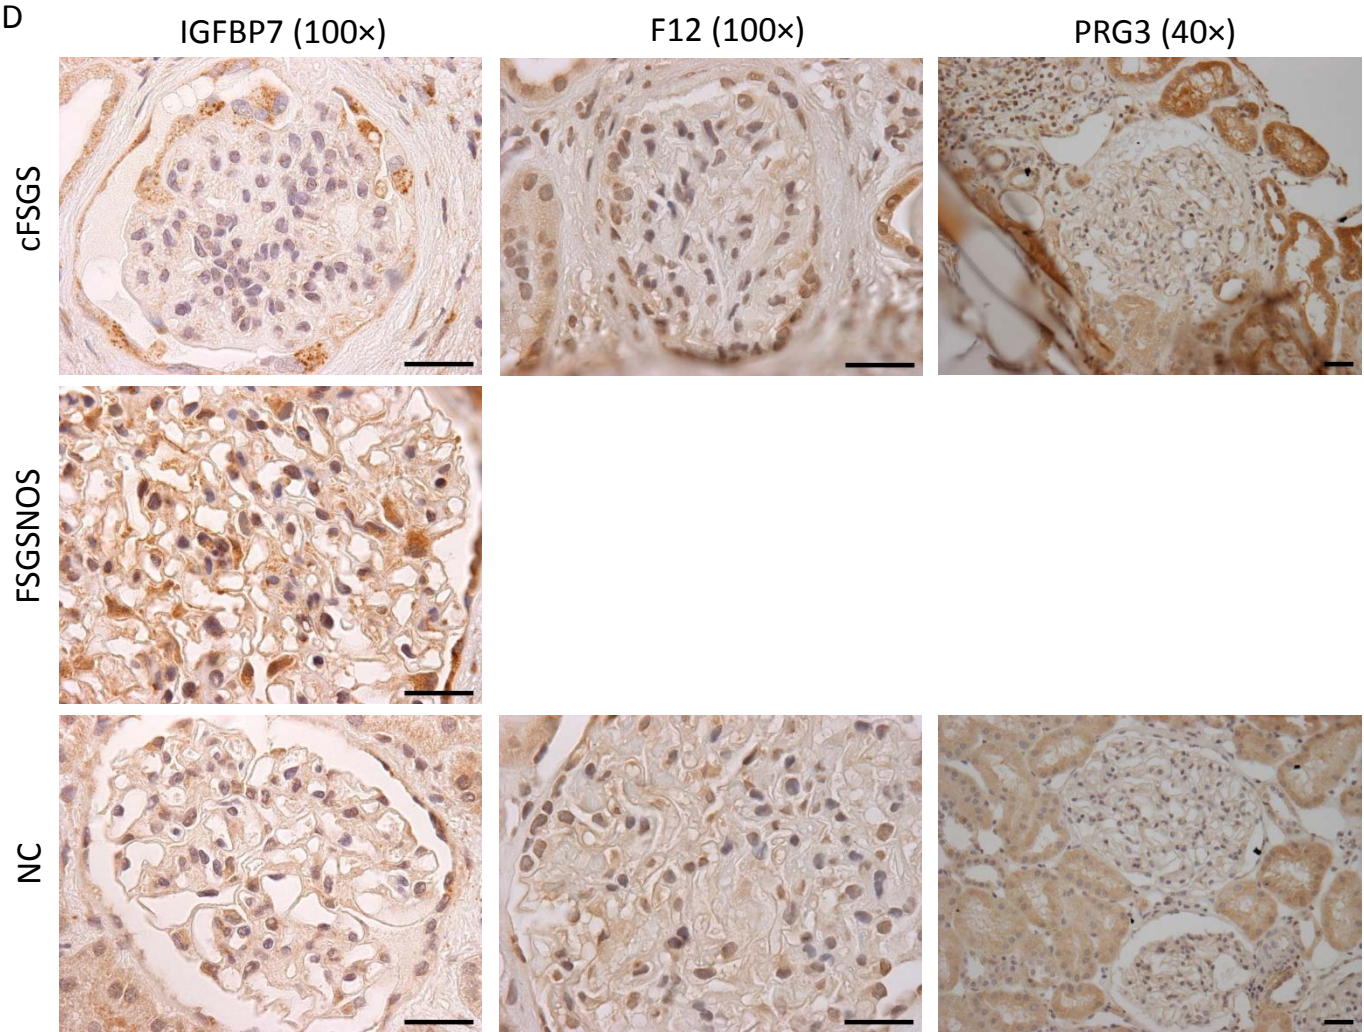



Supplemental Figure 3E.

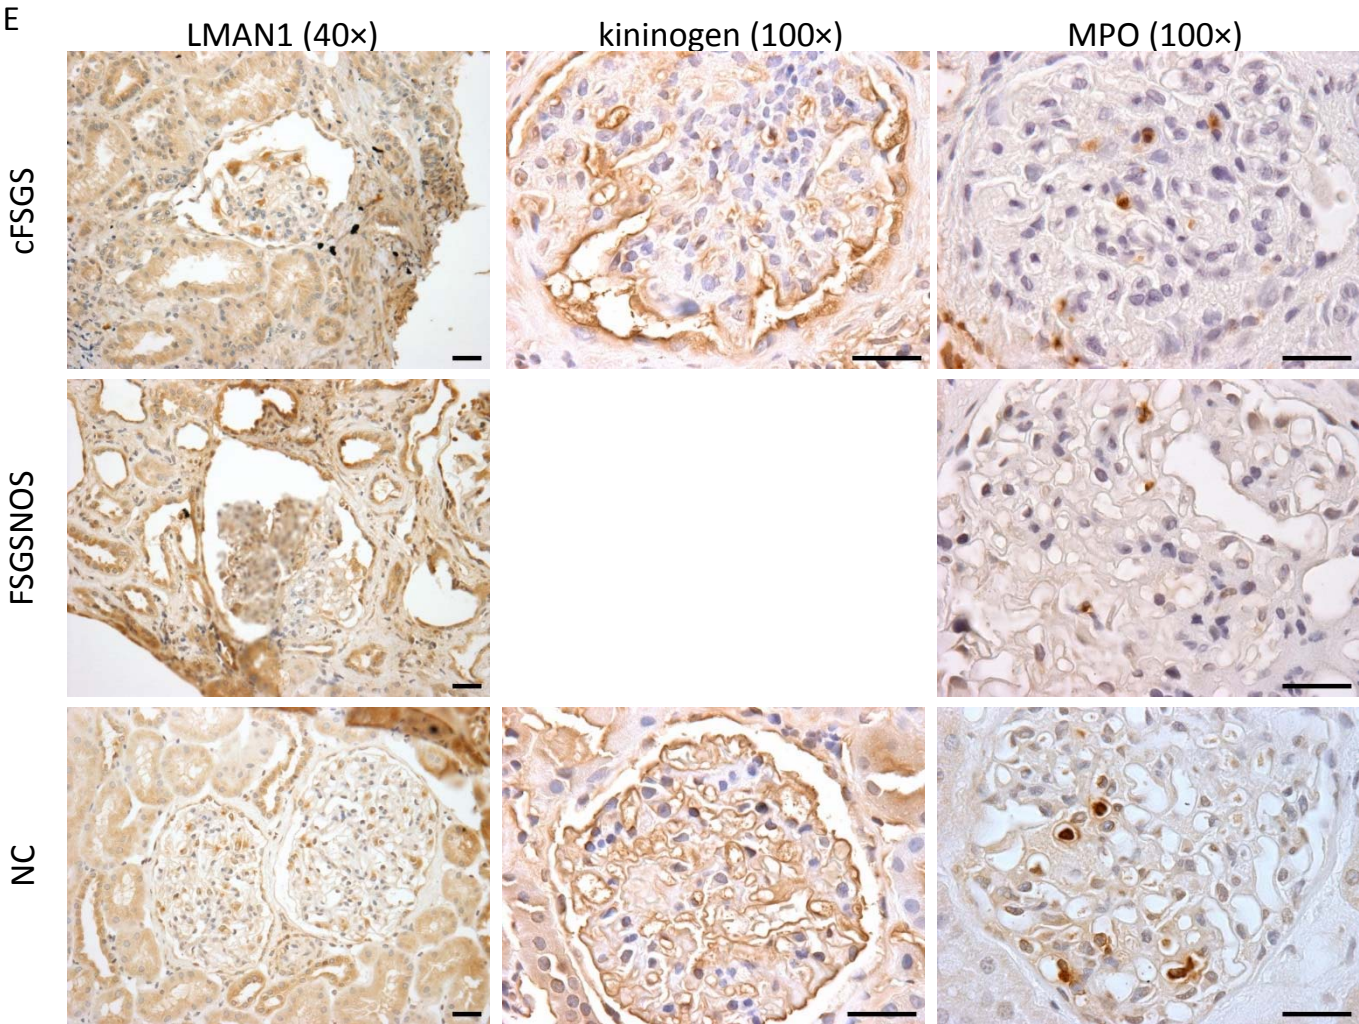

Supplemental Figure 3. Immunostaining of renal biopsy sections from patients with cFSGS, FSGS-NOS, and normal controls. A, immunohistochemistry for azurocidin (AZU1), serpin D1, and cathepsin G (CTSG). B, Immunohistochemistry for elastase (ELANE). Black arrows indicate positive staining of neutrophils using anti-elastase antibody. C, immunohistochemistry for HTRA1. D, IGFBP7 immunohistochemistry. E, IGFBP7, F12, and PRG3 immunohistochemistry. F, LMAN1, kininogen, and MPO immunohistochemistry. G, immunohistochemistry of fibulin 5. Original magnification of images indicated above panels. Immunohistochemistry was performed as described in methods section using the following primary antibodies: Azurocidin (1:100; #181989, Abcam), serpin D1 (1:200; #HPA055767, Sigma), cathepsin G (1:25; #PA5 83878, ThermoFisher, Waltham, MA), neutrophil elastase (1:200; #21595, Abcam), GFALS (1:100; #HPA040948, Sigma), IGFBP7 (1:100; #HpA002196, Sigma), F12 (1:20; #HPA003825, Sigma), PRG3 (1:2500; #204606, Abcam), LMAN1 (1:500; #13364-1, ProteinTech), kininogen 1 (1:100; #AF1569, R&D Systems), and MPO (1:200; #9535, Abcam),

| <b>Supplemental Table 1. All Glomerular Proteins Identified and Statistical Evaluation of Abundance among cFSGS, FSGS-NOS, and NC</b> |                  |                                  |                           |                               |                                  |                           |                               |
|---------------------------------------------------------------------------------------------------------------------------------------|------------------|----------------------------------|---------------------------|-------------------------------|----------------------------------|---------------------------|-------------------------------|
| <b>Protein</b>                                                                                                                        | <b>Gene Name</b> | <b>Log2 FC (cFSGS: FSGS-NOS)</b> | <b>Log2 FC (cFSGS:NC)</b> | <b>Log2 FC (FSGS-NOS: NC)</b> | <b>q-value (cFSGS: FSGS-NOS)</b> | <b>q-value (cFSGS:NC)</b> | <b>q-value (FSGS-NOS: NC)</b> |
| Alpha-1B-glycoprotein                                                                                                                 | A1BG             | 1.0151                           | -0.4909                   | -1.1737                       | 0.5259                           | 0.7695                    | 0.4500                        |
| Cluster of Alpha-2-macroglobulin                                                                                                      | A2M              | 2.6992                           | -1.4578                   | -3.2707                       | 0.0561                           | 0.3078                    | 0.0239                        |
| Isoform 2 of Alanine--tRNA ligase, cytoplasmic                                                                                        | AARS             | -0.5617                          | 1.4098                    | 1.7672                        | 0.7504                           | 0.3238                    | 0.2300                        |
| 4-aminobutyrate aminotransferase, mitochondrial                                                                                       | ABAT             | -8.6382                          | -5.7429                   | 0.2465                        | 0.0000                           | 0.0003                    | 0.8888                        |
| Isoform 9 of Multidrug resistance-associated protein 1                                                                                | ABCC1            | 0.0563                           | -0.7461                   | -0.7710                       | 0.9724                           | 0.6423                    | 0.6393                        |
| ATP-binding cassette sub-family E member 1                                                                                            | ABCE1            | -3.2356                          | -0.2629                   | 1.9465                        | 0.0227                           | 0.8708                    | 0.1824                        |
| ATP-binding cassette sub-family F member 1                                                                                            | ABCF1            | -0.1855                          | 1.9472                    | 2.0385                        | 0.9225                           | 0.1611                    | 0.1586                        |
| Protein ABHD14B                                                                                                                       | ABHD14B          | 3.0129                           | -4.7312                   | -6.6989                       | 0.0334                           | 0.0017                    | 0.0001                        |
| Isoform 11 of Abl interactor 1                                                                                                        | ABI1             | -4.9137                          | 6.0089                    | 9.2488                        | 0.0011                           | 0.0002                    | 0.0000                        |
| 3-ketoacyl-CoA thiolase, peroxisomal                                                                                                  | ACAA1            | -4.3481                          | -0.2332                   | 2.7337                        | 0.0030                           | 0.8857                    | 0.0560                        |
| 3-ketoacyl-CoA thiolase, mitochondrial                                                                                                | ACAA2            | 1.8356                           | 0.5284                    | -0.7318                       | 0.2036                           | 0.7497                    | 0.6557                        |
| Isoform 2 of Medium-chain specific acyl-CoA dehydrogenase, mitochondrial                                                              | ACADM            | 0.3254                           | 0.3337                    | 0.1059                        | 0.8591                           | 0.8411                    | 0.9517                        |
| Short/branched chain specific acyl-CoA dehydrogenase, mitochondrial                                                                   | ACADSB           | -7.3467                          | -1.4250                   | 3.6066                        | 0.0000                           | 0.3175                    | 0.0146                        |
| Cluster of Very long-chain specific acyl-CoA dehydrogenase, mitochondrial                                                             | ACADVL           | 1.5174                           | 4.5788                    | 3.4624                        | 0.3051                           | 0.0021                    | 0.0180                        |
| Acetyl-CoA acetyltransferase, mitochondrial                                                                                           | ACAT1            | -2.4956                          | -2.9313                   | -1.1781                       | 0.0765                           | 0.0339                    | 0.4488                        |
| Golgi resident protein GCP60                                                                                                          | ACBD3            | -2.8733                          | 0.0967                    | 2.0528                        | 0.0422                           | 0.9509                    | 0.1553                        |
| Isoform 4 of Apoptotic chromatin condensation inducer in the nucleus                                                                  | ACIN1            | -0.9614                          | -0.9029                   | -0.2315                       | 0.5498                           | 0.5568                    | 0.8968                        |
| ATP-citrate synthase                                                                                                                  | ACLY             | -1.0130                          | -0.6777                   | 0.0248                        | 0.5264                           | 0.6724                    | 0.9870                        |
| Cytoplasmic aconitate hydratase                                                                                                       | ACO1             | 0.3244                           | -2.1433                   | -2.3257                       | 0.8592                           | 0.1199                    | 0.1022                        |
| Aconitate hydratase, mitochondrial                                                                                                    | ACO2             | -1.3953                          | -2.6893                   | -1.6901                       | 0.3499                           | 0.0513                    | 0.2535                        |
| Acyl-coenzyme A thioesterase 2, mitochondrial                                                                                         | ACOT2            | -7.6752                          | 1.0843                    | 6.2945                        | 0.0000                           | 0.4689                    | 0.0002                        |
| Acyl-coenzyme A thioesterase 9, mitochondrial                                                                                         | ACOT9            | 5.8542                           | 3.2381                    | -0.8093                       | 0.0002                           | 0.0199                    | 0.6242                        |
| Isoform 3 of Medium-chain acyl-CoA ligase ACSF2, mitochondrial                                                                        | ACSF2            | -0.8032                          | -1.3565                   | -0.7847                       | 0.6339                           | 0.3469                    | 0.6346                        |

|                                                                |        |          |          |         |        |        |        |
|----------------------------------------------------------------|--------|----------|----------|---------|--------|--------|--------|
| Cluster of Actin, aortic smooth muscle                         | ACTA2  | 0.3967   | -1.2321  | -1.4802 | 0.8249 | 0.3982 | 0.3246 |
| Cluster of Alpha-actinin-4                                     | ACTN4  | -2.1496  | -3.2524  | -1.7290 | 0.1288 | 0.0194 | 0.2407 |
| Alpha-centractin                                               | ACTR1A | -0.1514  | -0.7853  | -0.6679 | 0.9388 | 0.6214 | 0.6868 |
| Beta-centractin                                                | ACTR1B | 1.0611   | 1.1467   | 0.4030  | 0.5029 | 0.4383 | 0.8208 |
| Actin-related protein 2                                        | ACTR2  | 0.3351   | -1.0787  | -1.2876 | 0.8538 | 0.4710 | 0.3993 |
| Cluster of Actin-related protein 3                             | ACTR3  | -0.4561  | -1.5688  | -1.2297 | 0.7998 | 0.2646 | 0.4244 |
| Aminoacylase-1                                                 | ACY1   | -2.2095  | -8.9696  | -7.3025 | 0.1188 | 0.0000 | 0.0000 |
| Isoform 2 of Alpha-adducin                                     | ADD1   | -4.7832  | -2.2626  | 1.0373  | 0.0014 | 0.1000 | 0.5078 |
| Isoform 1 of Gamma-adducin                                     | ADD3   | 2.5534   | 0.9597   | -0.7975 | 0.0696 | 0.5291 | 0.6296 |
| Cluster of Alcohol dehydrogenase 1C                            | ADH1C  | -28.5069 | 0.5603   | 19.9744 | 0.0000 | 0.7291 | 0.0000 |
| Isoform 2 of All-trans-retinol dehydrogenase [NAD(+)] ADH4     | ADH4   | -15.5666 | -1.3800  | 9.2518  | 0.0000 | 0.3354 | 0.0000 |
| Alcohol dehydrogenase class-3                                  | ADH5   | 2.1858   | 1.2415   | -0.2702 | 0.1223 | 0.3947 | 0.8827 |
| Adipogenesis regulatory factor                                 | ADIRF  | -0.5879  | 0.5712   | 0.9616  | 0.7395 | 0.7234 | 0.5389 |
| Afamin                                                         | AFM    | 7.9925   | 4.7584   | -0.7733 | 0.0000 | 0.0016 | 0.6387 |
| Agmatinase, mitochondrial                                      | AGMAT  | -24.3199 | -17.2970 | -0.4141 | 0.0000 | 0.0000 | 0.8142 |
| Isoform 6 of Agrin                                             | AGRN   | 1.2671   | -1.4182  | -2.2561 | 0.4033 | 0.3198 | 0.1147 |
| Angiotensinogen                                                | AGT    | 0.4952   | 0.3063   | -0.0366 | 0.7785 | 0.8524 | 0.9804 |
| Serine--pyruvate aminotransferase                              | AGXT   | -15.0317 | -2.7725  | 7.5198  | 0.0000 | 0.0449 | 0.0000 |
| Adenosylhomocysteinase                                         | AHCY   | -7.6873  | -4.0515  | 1.2595  | 0.0000 | 0.0052 | 0.4117 |
| Cluster of Neuroblast differentiation-associated protein AHNAK | AHNAK  | 0.5324   | -0.7235  | -1.0733 | 0.7673 | 0.6504 | 0.4918 |
| Alpha-2-HS-glycoprotein                                        | AHSG   | 6.2917   | -3.5884  | -7.8108 | 0.0001 | 0.0113 | 0.0000 |
| Cluster of Allograft inflammatory factor 1                     | AIF1   | -0.5635  | -11.8705 | 11.2726 | 0.7504 | 0.0000 | 0.0000 |
| Isoform 2 of Allograft inflammatory factor 1-like              | AIF1L  | -0.5319  | -8.9853  | -8.4609 | 0.7673 | 0.0000 | 0.0000 |
| Isoform 3 of Apoptosis-inducing factor 1, mitochondrial        | AIFM1  | -4.3816  | -0.8210  | 2.1794  | 0.0029 | 0.6018 | 0.1284 |
| AH receptor-interacting protein                                | AIP    | -1.9584  | 2.1171   | 3.4134  | 0.1721 | 0.1236 | 0.0193 |
| Adenylate kinase isoenzyme 1                                   | AK1    | -1.3917  | -3.3940  | -2.3845 | 0.3506 | 0.0153 | 0.0931 |
| Cluster of Isoform 2 of Adenylate kinase 2, mitochondrial      | AK2    | -2.4020  | -0.6430  | 1.0052  | 0.0887 | 0.6919 | 0.5195 |
| GTP:AMP phosphotransferase AK3, mitochondrial                  | AK3    | 1.0924   | 0.2234   | -0.5250 | 0.4868 | 0.8897 | 0.7630 |
| Isoform 2 of A-kinase anchor protein 12                        | AKAP12 | 3.3245   | 1.8221   | -0.4760 | 0.0195 | 0.1938 | 0.7812 |
| Isoform 2 of A-kinase anchor protein 2                         | AKAP2  | -0.0556  | -0.5220  | -0.4747 | 0.9724 | 0.7521 | 0.7812 |
| Aldo-keto reductase family 1 member A1                         | AKR1A1 | -2.5097  | -4.7174  | -2.9223 | 0.0747 | 0.0017 | 0.0409 |
| Aflatoxin B1 aldehyde reductase member 2                       | AKR7A2 | -0.2926  | -1.0266  | -0.8087 | 0.8710 | 0.4957 | 0.6242 |
| Isoform 2 of Delta-aminolevulinic acid dehydratase             | ALAD   | -0.5061  | -12.0505 | 11.4884 | 0.7769 | 0.0000 | 0.0000 |
| Serum albumin                                                  | ALB    | 0.5758   | -2.9058  | -3.2458 | 0.7463 | 0.0354 | 0.0248 |

|                                                                                   |          |          |         |         |        |        |        |
|-----------------------------------------------------------------------------------|----------|----------|---------|---------|--------|--------|--------|
| Cluster of Aldehyde dehydrogenase family 16 member A1                             | ALDH16A1 | -4.3485  | -2.4012 | 0.6051  | 0.0030 | 0.0810 | 0.7208 |
| Retinal dehydrogenase 1                                                           | ALDH1A1  | -2.5779  | -0.8398 | 0.9318  | 0.0677 | 0.5909 | 0.5553 |
| Isoform 2 of Retinal dehydrogenase 2                                              | ALDH1A2  | 0.8712   | -0.9081 | -1.4853 | 0.5979 | 0.5537 | 0.3234 |
| Aldehyde dehydrogenase X, mitochondrial                                           | ALDH1B1  | -1.3535  | 3.1433  | 4.0089  | 0.3657 | 0.0233 | 0.0072 |
| Isoform 3 of Cytosolic 10-formyltetrahydrofolate dehydrogenase                    | ALDH1L1  | -13.8453 | -0.5788 | 8.8656  | 0.0000 | 0.7196 | 0.0000 |
| Aldehyde dehydrogenase, mitochondrial                                             | ALDH2    | -2.0134  | -2.0998 | -0.6900 | 0.1592 | 0.1268 | 0.6726 |
| Isoform 3 of Delta-1-pyrroline-5-carboxylate dehydrogenase, mitochondrial         | ALDH4A1  | -1.0092  | -0.5134 | 0.1835  | 0.5273 | 0.7579 | 0.9143 |
| Isoform 2 of Methylmalonate-semialdehyde dehydrogenase [acylating], mitochondrial | ALDH6A1  | -10.4455 | -0.8204 | 6.3118  | 0.0000 | 0.6018 | 0.0002 |
| Alpha-aminoadipic semialdehyde dehydrogenase                                      | ALDH7A1  | -1.1658  | -3.4421 | -2.5857 | 0.4486 | 0.0141 | 0.0690 |
| Isoform 3 of 4-trimethylaminobutyraldehyde dehydrogenase                          | ALDH9A1  | 0.3762   | -5.4678 | -5.6256 | 0.8347 | 0.0005 | 0.0005 |
| Fructose-bisphosphate aldolase A                                                  | ALDOA    | 0.9186   | -2.5717 | -3.1513 | 0.5695 | 0.0615 | 0.0288 |
| Fructose-bisphosphate aldolase B                                                  | ALDOB    | -1.5029  | -3.0196 | -1.9411 | 0.3121 | 0.0289 | 0.1836 |
| Fructose-bisphosphate aldolase C                                                  | ALDOC    | 3.0791   | -0.4710 | -2.5606 | 0.0297 | 0.7796 | 0.0715 |
| Protein AMBP                                                                      | AMBP     | -0.3624  | 1.6890  | 1.9055  | 0.8423 | 0.2275 | 0.1924 |
| Isoform 2 of Anaphase-promoting complex subunit 7                                 | ANAPC7   | -1.3244  | -0.9641 | -0.0443 | 0.3792 | 0.5273 | 0.9771 |
| Angiopoietin-related protein 6                                                    | ANGPTL6  | 2.5380   | 2.8739  | 1.0928  | 0.0713 | 0.0376 | 0.4839 |
| Acidic leucine-rich nuclear phosphoprotein 32 family member A                     | ANP32A   | -10.5988 | -0.3903 | 6.8386  | 0.0000 | 0.8180 | 0.0001 |
| Aminopeptidase N                                                                  | ANPEP    | -0.4024  | -3.5025 | -3.1653 | 0.8234 | 0.0128 | 0.0282 |
| Annexin A1                                                                        | ANXA1    | -0.6835  | 2.3181  | 2.7421  | 0.6939 | 0.0920 | 0.0554 |
| Isoform 2 of Annexin A11                                                          | ANXA11   | -0.2915  | -0.0563 | 0.1433  | 0.8710 | 0.9683 | 0.9298 |
| Isoform 2 of Annexin A2                                                           | ANXA2    | 0.9514   | -0.3682 | -1.0098 | 0.5558 | 0.8268 | 0.5174 |
| Annexin A3                                                                        | ANXA3    | 8.3276   | 5.3101  | -0.4599 | 0.0000 | 0.0006 | 0.7890 |
| Annexin A4                                                                        | ANXA4    | 0.2195   | 1.6441  | 1.4648  | 0.9047 | 0.2417 | 0.3299 |
| Annexin A5                                                                        | ANXA5    | 1.2337   | -0.0677 | -0.9070 | 0.4182 | 0.9614 | 0.5699 |
| Annexin A6                                                                        | ANXA6    | 0.0450   | 0.7661  | 0.7217  | 0.9751 | 0.6331 | 0.6595 |
| Isoform 2 of Annexin A7                                                           | ANXA7    | 0.1648   | 5.8962  | 5.6776  | 0.9318 | 0.0003 | 0.0005 |
| Isoform 2 of AP-1 complex subunit gamma-1                                         | AP1G1    | 2.6435   | -0.1170 | -1.9161 | 0.0614 | 0.9410 | 0.1900 |
| Cluster of Isoform B of AP-2 complex subunit alpha-1                              | AP2A1    | 0.2831   | -1.4202 | -1.5875 | 0.8743 | 0.3192 | 0.2869 |
| Cluster of Isoform 2 of AP-2 complex subunit beta                                 | AP2B1    | 0.5719   | -2.6394 | -2.9816 | 0.7463 | 0.0557 | 0.0380 |
| Isoform 5 of AP-3 complex subunit delta-1                                         | AP3D1    | 1.0411   | -1.1085 | -1.7980 | 0.5122 | 0.4555 | 0.2233 |

|                                                                     |          |          |          |         |        |        |        |
|---------------------------------------------------------------------|----------|----------|----------|---------|--------|--------|--------|
| Serum amyloid P-component                                           | APCS     | -0.5919  | 2.5343   | 2.8919  | 0.7388 | 0.0653 | 0.0427 |
| Acylamino-acid-releasing enzyme                                     | APEH     | -5.0774  | -0.0595  | 3.4012  | 0.0008 | 0.9664 | 0.0194 |
| DNA-(apurinic or apyrimidinic site) lyase                           | APEX1    | 1.4445   | 1.2552   | 0.2483  | 0.3307 | 0.3888 | 0.8888 |
| Adipocyte plasma membrane-associated protein                        | APMAP    | -1.1919  | -1.0786  | -0.2471 | 0.4378 | 0.4710 | 0.8888 |
| Apolipoprotein A-I                                                  | APOA1    | 1.9958   | -1.0651  | -2.4058 | 0.1633 | 0.4755 | 0.0913 |
| Apolipoprotein A-II                                                 | APOA2    | 1.5341   | -2.6289  | -3.6268 | 0.3002 | 0.0565 | 0.0141 |
| Apolipoprotein A-IV                                                 | APOA4    | 0.7671   | 0.7852   | 0.2484  | 0.6530 | 0.6214 | 0.8888 |
| Apolipoprotein B-100                                                | APOB     | 2.1637   | 1.2362   | -0.2604 | 0.1266 | 0.3970 | 0.8853 |
| Apolipoprotein C-III                                                | APOC3    | 13.4802  | 8.4259   | -0.9111 | 0.0000 | 0.0000 | 0.5675 |
| Apolipoprotein D                                                    | APOD     | 0.6937   | 5.8298   | 5.2521  | 0.6887 | 0.0003 | 0.0009 |
| Apolipoprotein E                                                    | APOE     | 0.6407   | 1.8742   | 1.4038  | 0.7156 | 0.1800 | 0.3533 |
| Beta-2-glycoprotein 1                                               | APOH     | 1.3239   | -0.0197  | -0.9215 | 0.3792 | 0.9880 | 0.5616 |
| Apolipoprotein L2                                                   | APOL2    | 0.8392   | 0.8128   | 0.2264  | 0.6146 | 0.6054 | 0.8976 |
| Adenine phosphoribosyltransferase                                   | APRT     | 1.1287   | -0.9639  | -1.7156 | 0.4689 | 0.5273 | 0.2452 |
| Isoform 2 of Aquaporin-1                                            | AQP1     | 1.6824   | 4.4002   | 3.1745  | 0.2490 | 0.0029 | 0.0277 |
| Cluster of ADP-ribosylation factor 3                                | ARF3     | 2.0879   | -1.7903  | -3.1808 | 0.1430 | 0.2003 | 0.0276 |
| ADP-ribosylation factor 6                                           | ARF6     | -21.9569 | -14.0280 | 1.1858  | 0.0000 | 0.0000 | 0.4463 |
| Isoform 2 of Arginase-1                                             | ARG1     | -7.8676  | -1.1293  | 4.2520  | 0.0000 | 0.4459 | 0.0049 |
| Rho GTPase-activating protein 1                                     | ARHGAP1  | 0.7988   | 1.2063   | 0.6403  | 0.6356 | 0.4096 | 0.7033 |
| Rho GDP-dissociation inhibitor 1                                    | ARHGDI1  | 0.3364   | -2.1512  | -2.3417 | 0.8538 | 0.1187 | 0.0995 |
| Rho GDP-dissociation inhibitor 2                                    | ARHGDI2  | 1.3795   | -3.2528  | -4.1341 | 0.3551 | 0.0194 | 0.0059 |
| Rho guanine nucleotide exchange factor 12                           | ARHGEF12 | -0.3434  | -0.1057  | 0.1302  | 0.8507 | 0.9469 | 0.9349 |
| Rho guanine nucleotide exchange factor 15                           | ARHGEF15 | -0.8780  | -1.6218  | -0.9943 | 0.5939 | 0.2490 | 0.5240 |
| Rho guanine nucleotide exchange factor 17                           | ARHGEF17 | -0.2922  | -0.3746  | -0.1687 | 0.8710 | 0.8251 | 0.9236 |
| PRA1 family protein 3                                               | ARL6IP5  | 0.1944   | 11.5574  | 11.2166 | 0.9192 | 0.0000 | 0.0000 |
| Isoform 2 of Actin-related protein 2/3 complex subunit 1A           | ARPC1A   | -0.7039  | -12.1002 | 11.4026 | 0.6868 | 0.0000 | 0.0000 |
| Actin-related protein 2/3 complex subunit 1B                        | ARPC1B   | -1.2899  | 4.3147   | 5.1159  | 0.3932 | 0.0033 | 0.0011 |
| Actin-related protein 2/3 complex subunit 2                         | ARPC2    | -1.1726  | -1.0906  | -0.2719 | 0.4458 | 0.4661 | 0.8827 |
| Actin-related protein 2/3 complex subunit 3                         | ARPC3    | -1.8801  | -2.3415  | -1.0182 | 0.1915 | 0.0894 | 0.5159 |
| Cluster of Isoform 3 of Actin-related protein 2/3 complex subunit 4 | ARPC4    | 1.3566   | 8.6270   | 7.5472  | 0.3651 | 0.0000 | 0.0000 |
| Isoform 2 of Actin-related protein 2/3 complex subunit 5            | ARPC5    | -0.2299  | 11.2647  | 11.2183 | 0.8996 | 0.0000 | 0.0000 |
| Isoform 1B of Beta-arrestin-1                                       | ARRB1    | -1.1414  | -2.5952  | -1.7707 | 0.4624 | 0.0595 | 0.2293 |
| Isoform 3 of Acid ceramidase                                        | ASAH1    | 8.7929   | 5.3324   | -0.7550 | 0.0000 | 0.0006 | 0.6439 |
| Argininosuccinate synthase                                          | ASS1     | -0.3724  | -4.5406  | -4.2051 | 0.8366 | 0.0023 | 0.0053 |

|                                                                        |          |          |         |         |        |        |        |
|------------------------------------------------------------------------|----------|----------|---------|---------|--------|--------|--------|
| Isoform 2 of Bifunctional purine biosynthesis protein PURH             | ATIC     | 2.8201   | 0.7295  | -1.2052 | 0.0457 | 0.6499 | 0.4361 |
| Cluster of Sodium/potassium-transporting ATPase subunit alpha-2        | ATP1A2   | -20.5250 | -2.0909 | 11.9322 | 0.0000 | 0.1282 | 0.0000 |
| Sodium/potassium-transporting ATPase subunit alpha-4                   | ATP1A4   | -3.5869  | -0.2962 | 2.1532  | 0.0122 | 0.8561 | 0.1335 |
| Isoform 2 of Sodium/potassium-transporting ATPase subunit beta-1       | ATP1B1   | 0.3273   | -0.2866 | -0.5045 | 0.8582 | 0.8599 | 0.7716 |
| Isoform 2 of Sarcoplasmic/endoplasmic reticulum calcium ATPase 2       | ATP2A2   | 0.9844   | 1.1159  | 0.4250  | 0.5387 | 0.4522 | 0.8077 |
| Cluster of Isoform XG of Plasma membrane calcium-transporting ATPase 3 | ATP2B3   | -3.4688  | -0.7640 | 1.6133  | 0.0148 | 0.6341 | 0.2782 |
| ATP synthase subunit alpha, mitochondrial                              | ATP5F1A  | 0.3367   | -0.1574 | -0.3840 | 0.8538 | 0.9183 | 0.8288 |
| ATP synthase subunit beta, mitochondrial                               | ATP5F1B  | -0.1567  | -0.4901 | -0.3745 | 0.9364 | 0.7696 | 0.8348 |
| Cluster of ATP synthase subunit gamma, mitochondrial                   | ATP5F1C  | 0.3428   | -0.9206 | -1.1376 | 0.8507 | 0.5484 | 0.4639 |
| ATP synthase subunit delta, mitochondrial                              | ATP5F1D  | 13.8534  | 8.3876  | -1.2031 | 0.0000 | 0.0000 | 0.4365 |
| Isoform 2 of ATP synthase subunit f, mitochondrial                     | ATP5MF   | -1.7155  | 0.8504  | 2.0040  | 0.2386 | 0.5852 | 0.1669 |
| ATP synthase subunit d, mitochondrial                                  | ATP5PD   | -0.4815  | -0.6060 | -0.2670 | 0.7863 | 0.7083 | 0.8827 |
| ATP synthase subunit O, mitochondrial                                  | ATP5PO   | 0.9632   | 0.5987  | -0.0685 | 0.5496 | 0.7093 | 0.9656 |
| V-type proton ATPase catalytic subunit A                               | ATP6V1A  | -1.0111  | -0.8972 | -0.1920 | 0.5264 | 0.5584 | 0.9101 |
| Cluster of V-type proton ATPase subunit B, brain isoform               | ATP6V1B2 | -2.6154  | -2.8100 | -0.9773 | 0.0638 | 0.0421 | 0.5316 |
| Zinc-alpha-2-glycoprotein                                              | AZGP1    | 1.4836   | 0.2085  | -0.8062 | 0.3177 | 0.8954 | 0.6255 |
| Azurocidin                                                             | AZU1     | 12.4662  | 8.2989  | -0.3449 | 0.0000 | 0.0000 | 0.8452 |
| Beta-2-microglobulin                                                   | B2M      | -4.6045  | 10.3908 | 13.3410 | 0.0019 | 0.0000 | 0.0000 |
| BAG family molecular chaperone regulator 3                             | BAG3     | 4.1458   | 2.1141  | -0.7489 | 0.0045 | 0.1239 | 0.6470 |
| Isoform 5 of Large proline-rich protein BAG6                           | BAG6     | 6.0238   | 3.6648  | -0.5058 | 0.0002 | 0.0100 | 0.7716 |
| Barrier-to-autointegration factor                                      | BANF1    | 1.2776   | -0.8889 | -1.7434 | 0.3988 | 0.5629 | 0.2362 |
| Brain acid soluble protein 1                                           | BASP1    | -0.5271  | 1.8084  | 2.1350  | 0.7688 | 0.1960 | 0.1373 |
| Isoform Epsilon of Apoptosis regulator BAX                             | BAX      | 7.3761   | 3.7373  | -1.3560 | 0.0000 | 0.0089 | 0.3712 |
| Basal cell adhesion molecule                                           | BCAM     | -0.1787  | -3.3822 | -3.1995 | 0.9267 | 0.0156 | 0.0266 |
| Bcl-2-like protein 13                                                  | BCL2L13  | 0.7391   | 2.4051  | 1.8582  | 0.6696 | 0.0805 | 0.2058 |
| 3-hydroxybutyrate dehydrogenase type 2                                 | BDH2     | 3.5290   | 7.2248  | 4.6900  | 0.0134 | 0.0000 | 0.0024 |
| Biglycan                                                               | BGN      | -0.0659  | 2.9734  | 2.9647  | 0.9677 | 0.0314 | 0.0388 |
| Betaine--homocysteine S-methyltransferase 1                            | BHMT     | -2.3332  | -2.9920 | -1.3483 | 0.0987 | 0.0304 | 0.3747 |
| Bleomycin hydrolase                                                    | BLMH     | -0.4315  | 2.8208  | 3.0640  | 0.8111 | 0.0414 | 0.0328 |

|                                                                      |          |         |          |         |        |        |        |
|----------------------------------------------------------------------|----------|---------|----------|---------|--------|--------|--------|
| Flavin reductase (NADPH)                                             | BLVRB    | -9.4825 | -9.0625  | -2.4380 | 0.0000 | 0.0000 | 0.0865 |
| Isoform 2 of ADP-ribosyl cyclase/cyclic ADP-ribose hydrolase 2       | BST1     | -1.0074 | -7.5032  | -6.6815 | 0.5280 | 0.0000 | 0.0001 |
| Isoform 2 of Ester hydrolase C11orf54                                | C11orf54 | -3.5505 | -5.5669  | -3.0473 | 0.0129 | 0.0004 | 0.0335 |
| Complement C1q subcomponent subunit A                                | C1QA     | 5.6799  | 0.4666   | -3.4120 | 0.0003 | 0.7820 | 0.0193 |
| Complement C1q subcomponent subunit B                                | C1QB     | 11.2660 | 0.3460   | -7.3367 | 0.0000 | 0.8348 | 0.0000 |
| Complement component 1 Q subcomponent-binding protein, mitochondrial | C1QBP    | 8.3834  | -1.5717  | -7.2557 | 0.0000 | 0.2637 | 0.0000 |
| Complement C1q subcomponent subunit C                                | C1QC     | 5.7094  | 0.6256   | -3.2760 | 0.0003 | 0.7004 | 0.0239 |
| Complement C1r subcomponent                                          | C1R      | 17.0424 | 9.5813   | -2.2038 | 0.0000 | 0.0000 | 0.1250 |
| Complement C1s subcomponent                                          | C1S      | 9.6355  | 5.2744   | -1.3861 | 0.0000 | 0.0007 | 0.3601 |
| Complement C3                                                        | C3       | 2.2095  | 0.1593   | -1.3491 | 0.1188 | 0.9182 | 0.3747 |
| Cluster of Complement C4-B                                           | C4B      | 4.5798  | 0.1814   | -2.9424 | 0.0020 | 0.9077 | 0.0401 |
| C4b-binding protein alpha chain                                      | C4BPA    | 3.9987  | 4.0702   | 1.2722  | 0.0058 | 0.0051 | 0.4063 |
| Isoform 2 of C4b-binding protein beta chain                          | C4BPB    | 11.6033 | 7.9793   | -0.0707 | 0.0000 | 0.0000 | 0.9647 |
| Complement C5                                                        | C5       | 0.9183  | 2.2800   | 1.6132  | 0.5695 | 0.0977 | 0.2782 |
| Complement component C6                                              | C6       | 1.4245  | 1.2451   | 0.2520  | 0.3382 | 0.3935 | 0.8881 |
| Complement component C7                                              | C7       | 0.6379  | 0.8778   | 0.4273  | 0.7168 | 0.5705 | 0.8071 |
| Complement component C8 alpha chain                                  | C8A      | 0.5318  | 1.8183   | 1.4232  | 0.7673 | 0.1938 | 0.3471 |
| Complement component C8 beta chain                                   | C8B      | 0.6091  | 2.1306   | 1.6772  | 0.7343 | 0.1214 | 0.2571 |
| Complement component C8 gamma chain                                  | C8G      | 1.1325  | 1.0840   | 0.2928  | 0.4669 | 0.4689 | 0.8769 |
| Complement component C9                                              | C9       | 1.1164  | 0.6296   | -0.1424 | 0.4730 | 0.6991 | 0.9298 |
| Carbonic anhydrase 1                                                 | CA1      | -3.0935 | -4.0035  | -1.8235 | 0.0289 | 0.0057 | 0.2160 |
| Carbonic anhydrase 2                                                 | CA2      | -0.0530 | -2.6731  | -2.5888 | 0.9730 | 0.0526 | 0.0689 |
| Calbindin                                                            | CALB1    | -0.2473 | -12.4635 | 12.0704 | 0.8904 | 0.0000 | 0.0000 |
| Caldesmon                                                            | CALD1    | -1.7124 | -0.1583  | 1.0114  | 0.2391 | 0.9183 | 0.5174 |
| Calmodulin-2                                                         | CALM2    | 1.4613  | -0.9122  | -1.8915 | 0.3258 | 0.5526 | 0.1959 |
| Calmodulin-like protein 5                                            | CALML5   | 2.8236  | 5.4686   | 3.4461  | 0.0455 | 0.0005 | 0.0184 |
| Calreticulin                                                         | CALR     | 2.6809  | -0.7296  | -2.5432 | 0.0579 | 0.6499 | 0.0733 |
| Cullin-associated NEDD8-dissociated protein 1                        | CAND1    | 2.0014  | -2.0920  | -3.4181 | 0.1625 | 0.1282 | 0.0192 |
| Isoform 2 of Cullin-associated NEDD8-dissociated protein 2           | CAND2    | 0.1868  | 0.4537   | 0.3182  | 0.9221 | 0.7895 | 0.8617 |
| Isoform 2 of Calnexin                                                | CANX     | -0.7186 | -0.3107  | 0.1845  | 0.6787 | 0.8505 | 0.9142 |
| Cluster of Adenylyl cyclase-associated protein 1                     | CAP1     | 0.5333  | -0.4628  | -0.8179 | 0.7673 | 0.7845 | 0.6202 |
| Cluster of Isoform 2 of Macrophage-capping protein                   | CAPG     | 16.6289 | 10.3974  | -1.1206 | 0.0000 | 0.0000 | 0.4728 |
| Calpain-1 catalytic subunit                                          | CAPN1    | 1.9592  | -1.5928  | -2.8991 | 0.1721 | 0.2572 | 0.0422 |



|                                                             |          |          |          |         |        |        |        |
|-------------------------------------------------------------|----------|----------|----------|---------|--------|--------|--------|
| Cluster of Calpain-2 catalytic subunit                      | CAPN2    | 1.0418   | -2.6993  | -3.3605 | 0.5122 | 0.0504 | 0.0205 |
| Calpain small subunit 1                                     | CAPNS1   | 1.1331   | -1.5931  | -2.3365 | 0.4669 | 0.2572 | 0.1003 |
| Caprin-1                                                    | CAPRIN1  | 4.7379   | 2.6202   | -0.6554 | 0.0015 | 0.0570 | 0.6934 |
| F-actin-capping protein subunit alpha-1                     | CAPZA1   | -1.3324  | -0.5822  | 0.3361  | 0.3756 | 0.7182 | 0.8500 |
| F-actin-capping protein subunit alpha-2                     | CAPZA2   | 0.1442   | -1.9060  | -1.9700 | 0.9409 | 0.1709 | 0.1767 |
| Isoform 2 of F-actin-capping protein subunit beta           | CAPZB    | -1.2723  | -3.8580  | -2.9215 | 0.4011 | 0.0073 | 0.0409 |
| Isoform 2 of Peripheral plasma membrane protein CASK        | CASK     | -1.1069  | -1.8444  | -1.0570 | 0.4784 | 0.1878 | 0.5006 |
| Caspase-14                                                  | CASP14   | -1.0237  | -0.2384  | 0.4634  | 0.5219 | 0.8842 | 0.7874 |
| Catalase                                                    | CAT      | -1.5935  | -3.3289  | -2.1831 | 0.2794 | 0.0170 | 0.1283 |
| Caveolae-associated protein 1                               | CAVIN1   | 3.1578   | 11.9789  | 9.6114  | 0.0259 | 0.0000 | 0.0000 |
| Caveolae-associated protein 2                               | CAVIN2   | 0.8873   | -0.5279  | -1.1230 | 0.5885 | 0.7497 | 0.4717 |
| Cluster of Carbonyl reductase [NADPH] 1                     | CBR1     | -1.2578  | -1.0700  | -0.1937 | 0.4057 | 0.4739 | 0.9094 |
| Cluster of Chromobox protein homolog 3                      | CBX3     | 1.6214   | 1.4041   | 0.2740  | 0.2695 | 0.3259 | 0.8827 |
| Isoform 2 of Cell cycle and apoptosis regulator protein 2   | CCAR2    | -4.3483  | -0.4284  | 2.5422  | 0.0030 | 0.7991 | 0.0733 |
| Coiled-coil domain-containing protein 22                    | CCDC22   | -3.0982  | -0.4592  | 1.6601  | 0.0288 | 0.7862 | 0.2636 |
| Cluster of T-complex protein 1 subunit beta                 | CCT2     | 0.1399   | -0.9223  | -1.0010 | 0.9420 | 0.5484 | 0.5203 |
| T-complex protein 1 subunit gamma                           | CCT3     | -0.1285  | -0.8370  | -0.7343 | 0.9468 | 0.5920 | 0.6551 |
| Isoform 2 of T-complex protein 1 subunit delta              | CCT4     | -0.5107  | -1.4394  | -1.0654 | 0.7759 | 0.3130 | 0.4957 |
| Cluster of Isoform 2 of T-complex protein 1 subunit epsilon | CCT5     | 7.8255   | 5.1522   | -0.2729 | 0.0000 | 0.0008 | 0.8827 |
| Cluster of T-complex protein 1 subunit zeta                 | CCT6A    | 1.9930   | -1.4218  | -2.7542 | 0.1639 | 0.3188 | 0.0542 |
| T-complex protein 1 subunit eta                             | CCT7     | 2.1321   | -0.1156  | -1.5664 | 0.1328 | 0.9410 | 0.2934 |
| T-complex protein 1 subunit theta                           | CCT8     | -0.2049  | -3.1286  | -2.9327 | 0.9141 | 0.0239 | 0.0403 |
| Isoform 3 of CD276 antigen                                  | CD276    | 13.7137  | 8.0973   | -1.3929 | 0.0000 | 0.0000 | 0.3581 |
| CD2-associated protein                                      | CD2AP    | -1.1207  | -0.1750  | 0.5917  | 0.4705 | 0.9109 | 0.7284 |
| Isoform 5 of CD44 antigen                                   | CD44     | -4.1384  | -0.2818  | 2.5431  | 0.0045 | 0.8626 | 0.0733 |
| CD5 antigen-like                                            | CD5L     | 8.5403   | 4.6190   | -1.2835 | 0.0000 | 0.0020 | 0.4008 |
| CD81 antigen                                                | CD81     | -17.3127 | -11.1998 | 0.7986  | 0.0000 | 0.0000 | 0.6296 |
| Hsp90 co-chaperone Cdc37                                    | CDC37    | 1.4144   | 1.4463   | 0.4565  | 0.3419 | 0.3103 | 0.7900 |
| Cell division control protein 42 homolog                    | CDC42    | -0.8620  | -2.3169  | -1.6878 | 0.6021 | 0.0920 | 0.2541 |
| Isoform 4 of Cadherin-13                                    | CDH13    | 2.5603   | 2.5540   | 0.7634  | 0.0688 | 0.0632 | 0.6422 |
| Isoform 2 of Cadherin-5                                     | CDH5     | -7.1495  | -1.9671  | 2.9399  | 0.0000 | 0.1567 | 0.0401 |
| Isoform 2 of CDK5 regulatory subunit-associated protein 3   | CDK5RAP3 | 2.6439   | 0.7621   | -1.0531 | 0.0614 | 0.6348 | 0.5028 |
| Cyclin-dependent kinase inhibitor 1B                        | CDKN1B   | -0.2701  | -5.7506  | -5.4630 | 0.8806 | 0.0003 | 0.0007 |

|                                                                                                |          |          |         |         |        |        |        |
|------------------------------------------------------------------------------------------------|----------|----------|---------|---------|--------|--------|--------|
| Corneodesmosin                                                                                 | CDSN     | -21.7780 | -2.3285 | 12.5526 | 0.0000 | 0.0908 | 0.0000 |
| Cluster of Isoform 3 of Protein CDV3 homolog                                                   | CDV3     | -19.4650 | 0.2973  | 13.5551 | 0.0000 | 0.8558 | 0.0000 |
| Isoform 2 of Liver carboxylesterase 1                                                          | CES1     | -24.9126 | -1.5880 | 15.4157 | 0.0000 | 0.2590 | 0.0000 |
| Complement factor B                                                                            | CFB      | 2.8647   | -0.1702 | -2.1190 | 0.0427 | 0.9131 | 0.1407 |
| Complement factor D                                                                            | CFD      | -13.3153 | -1.3804 | 7.7173  | 0.0000 | 0.3354 | 0.0000 |
| Complement factor H                                                                            | CFH      | 0.4007   | -0.0404 | -0.3127 | 0.8234 | 0.9767 | 0.8657 |
| Complement factor H-related protein 1                                                          | CFHR1    | -0.4110  | 0.5247  | 0.7953  | 0.8205 | 0.7508 | 0.6305 |
| Isoform Short of Complement factor H-related protein 2                                         | CFHR2    | -0.9231  | 2.9766  | 3.5520  | 0.5675 | 0.0313 | 0.0157 |
| Complement factor H-related protein 5                                                          | CFHR5    | 0.1634   | -1.2319 | -1.3211 | 0.9322 | 0.3982 | 0.3850 |
| Cluster of Cofilin-1                                                                           | CFL1     | 0.8665   | 0.7465  | 0.1426  | 0.5998 | 0.6423 | 0.9298 |
| Properdin                                                                                      | CFP      | 2.5635   | 3.2563  | 1.4509  | 0.0685 | 0.0194 | 0.3347 |
| Cingulin-like protein 1                                                                        | CGNL1    | -0.0623  | -3.0965 | -2.9982 | 0.9691 | 0.0252 | 0.0368 |
| Putative coiled-coil-helix-coiled-coil-helix domain-containing protein CHCHD2P9, mitochondrial | CHCHD2P9 | -20.6813 | -0.2135 | 13.8823 | 0.0000 | 0.8938 | 0.0000 |
| MIC complex subunit MIC19                                                                      | CHCHD3   | 2.9336   | 3.5502  | 1.4873  | 0.0378 | 0.0120 | 0.3234 |
| Charged multivesicular body protein 5                                                          | CHMP5    | 0.1871   | -2.3894 | -2.4738 | 0.9221 | 0.0825 | 0.0812 |
| Isoform 2 of Cold-inducible RNA-binding protein                                                | CIRBP    | 0.9620   | -0.8895 | -1.5290 | 0.5498 | 0.5629 | 0.3079 |
| Cytoskeleton-associated protein 4                                                              | CKAP4    | 1.3561   | -1.7740 | -2.6661 | 0.3651 | 0.2042 | 0.0615 |
| Creatine kinase B-type                                                                         | CKB      | -2.0990  | -4.2005 | -2.6946 | 0.1403 | 0.0041 | 0.0586 |
| Chloride intracellular channel protein 1                                                       | CLIC1    | 1.8630   | -1.1849 | -2.4330 | 0.1951 | 0.4198 | 0.0872 |
| Chloride intracellular channel protein 4                                                       | CLIC4    | 14.3336  | -1.3976 | 11.1391 | 0.0000 | 0.3286 | 0.0000 |
| Isoform 1 of Chloride intracellular channel protein 5                                          | CLIC5    | -0.7561  | -4.4927 | -3.8966 | 0.6608 | 0.0025 | 0.0087 |
| Isoform Non-brain of Clathrin light chain A                                                    | CLTA     | 9.3246   | 5.6015  | -0.8531 | 0.0000 | 0.0004 | 0.6033 |
| Cluster of Isoform 2 of Clathrin heavy chain 1                                                 | CLTC     | 0.2313   | -0.9531 | -1.0935 | 0.8991 | 0.5330 | 0.4839 |
| Isoform 2 of Clusterin                                                                         | CLU      | 0.5847   | 0.6696  | 0.2591  | 0.7408 | 0.6765 | 0.8856 |
| Isoform 3 of UMP-CMP kinase                                                                    | CMPK1    | -2.3823  | -5.4118 | -3.6910 | 0.0912 | 0.0005 | 0.0126 |
| UMP-CMP kinase 2, mitochondrial                                                                | CMPK2    | 10.6491  | 6.6151  | -0.7602 | 0.0000 | 0.0001 | 0.6422 |
| Cluster of Isoform 4 of Cellular nucleic acid-binding protein                                  | CNBP     | -6.3750  | -0.5373 | 3.8163  | 0.0001 | 0.7439 | 0.0101 |
| Cytosolic non-specific dipeptidase                                                             | CNDP2    | -1.5011  | -3.7602 | -2.6697 | 0.3126 | 0.0086 | 0.0613 |
| Calponin-2                                                                                     | CNN2     | 2.6126   | -0.1475 | -1.9250 | 0.0640 | 0.9226 | 0.1883 |
| Calponin-3                                                                                     | CNN3     | 2.0771   | -1.6851 | -3.0701 | 0.1448 | 0.2280 | 0.0325 |
| Isoform 2 of Bifunctional coenzyme A synthase                                                  | COASY    | 7.7026   | 4.6477  | -0.6845 | 0.0000 | 0.0019 | 0.6758 |
| Collagen alpha-1(XII) chain                                                                    | COL12A1  | 3.8349   | 2.6167  | -0.0435 | 0.0078 | 0.0573 | 0.9771 |
| Collagen alpha-1(XV) chain                                                                     | COL15A1  | -2.0472  | 2.9388  | 4.2808  | 0.1513 | 0.0334 | 0.0047 |

|                                                     |         |          |          |         |        |        |        |
|-----------------------------------------------------|---------|----------|----------|---------|--------|--------|--------|
| Cluster of Collagen alpha-1(XVIII) chain            | COL18A1 | 0.6526   | 0.6525   | 0.1960  | 0.7091 | 0.6880 | 0.9094 |
| Collagen alpha-1(I) chain                           | COL1A1  | -1.4400  | -0.4323  | 0.5567  | 0.3318 | 0.7991 | 0.7456 |
| Collagen alpha-2(I) chain                           | COL1A2  | -3.0553  | -2.3329  | -0.2091 | 0.0309 | 0.0903 | 0.9038 |
| Cluster of Isoform 3 of Collagen alpha-1(XXI) chain | COL21A1 | 3.3964   | 2.0730   | -0.2786 | 0.0171 | 0.1311 | 0.8827 |
| Isoform 1 of Collagen alpha-1(II) chain             | COL2A1  | 1.5342   | 2.1415   | 1.0576  | 0.3002 | 0.1199 | 0.5006 |
| Cluster of Collagen alpha-1(III) chain              | COL3A1  | -0.5720  | -0.0451  | 0.3454  | 0.7463 | 0.9743 | 0.8452 |
| Collagen alpha-1(IV) chain                          | COL4A1  | -0.6056  | 0.5735   | 0.9758  | 0.7347 | 0.7222 | 0.5318 |
| Collagen alpha-2(IV) chain                          | COL4A2  | -1.0910  | 0.1162   | 0.8574  | 0.4868 | 0.9410 | 0.6017 |
| Cluster of Collagen alpha-3(IV) chain               | COL4A3  | 0.9354   | 0.9917   | 0.3365  | 0.5611 | 0.5128 | 0.8500 |
| Collagen alpha-4(IV) chain                          | COL4A4  | 0.4966   | 1.3963   | 1.0327  | 0.7785 | 0.3288 | 0.5094 |
| Isoform 2 of Collagen alpha-5(IV) chain             | COL4A5  | 0.7552   | 0.2945   | -0.2254 | 0.6608 | 0.8568 | 0.8978 |
| Collagen alpha-1(VI) chain                          | COL6A1  | 0.0070   | -1.2307  | -1.2133 | 0.9980 | 0.3984 | 0.4324 |
| Cluster of Collagen alpha-2(VI) chain               | COL6A2  | -0.2955  | -0.8340  | -0.6176 | 0.8710 | 0.5936 | 0.7143 |
| Isoform 2 of Collagen alpha-3(VI) chain             | COL6A3  | -0.5125  | -1.0697  | -0.7012 | 0.7755 | 0.4739 | 0.6686 |
| Isoform 2 of Collagen alpha-1(VII) chain            | COL7A1  | 1.8894   | 0.8958   | -0.4077 | 0.1902 | 0.5588 | 0.8176 |
| Isoform Soluble of Catechol O-methyltransferase     | COMT    | 0.4080   | -0.9782  | -1.2386 | 0.8208 | 0.5203 | 0.4209 |
| Isoform 2 of Coatomer subunit alpha                 | COPA    | 0.4272   | -3.5240  | -3.7516 | 0.8134 | 0.0125 | 0.0113 |
| Coatomer subunit beta                               | COPB1   | 1.4531   | -0.0886  | -1.0772 | 0.3284 | 0.9509 | 0.4902 |
| Isoform 2 of Coatomer subunit beta'                 | COPB2   | 0.1725   | -2.0116  | -2.0929 | 0.9290 | 0.1453 | 0.1458 |
| Coatomer subunit epsilon                            | COPE    | 1.4058   | -0.4439  | -1.3938 | 0.3450 | 0.7945 | 0.3581 |
| Coatomer subunit gamma-1                            | COPG1   | 0.5031   | -2.4049  | -2.7044 | 0.7769 | 0.0805 | 0.0579 |
| Isoform 2 of COP9 signalosome complex subunit 4     | COPS4   | -0.1490  | -0.7242  | -0.6096 | 0.9398 | 0.6504 | 0.7191 |
| COP9 signalosome complex subunit 7a                 | COPS7A  | -2.7295  | 0.7098   | 2.5568  | 0.0532 | 0.6575 | 0.0719 |
| Coronin-1A                                          | CORO1A  | 7.5307   | 5.4805   | 0.2505  | 0.0000 | 0.0005 | 0.8887 |
| Coronin-1B                                          | CORO1B  | -0.4226  | -1.5804  | -1.2639 | 0.8143 | 0.2609 | 0.4105 |
| Isoform 3 of Coronin-1C                             | CORO1C  | 1.6011   | 2.7674   | 1.6265  | 0.2765 | 0.0452 | 0.2744 |
| Coronin-2B                                          | CORO2B  | -3.7900  | 2.2707   | 4.8122  | 0.0085 | 0.0991 | 0.0019 |
| Coactosin-like protein                              | COTL1   | 1.4752   | 5.5963   | 4.4903  | 0.3212 | 0.0004 | 0.0033 |
| Cytochrome c oxidase subunit 5A, mitochondrial      | COX5A   | 16.4927  | -0.3196  | 11.5517 | 0.0000 | 0.8457 | 0.0000 |
| Cytochrome c oxidase subunit 6B1                    | COX6B1  | -18.5672 | -17.3596 | -4.3954 | 0.0000 | 0.0000 | 0.0038 |
| Ceruloplasmin                                       | CP      | 2.2188   | -0.9872  | -2.4812 | 0.1174 | 0.5144 | 0.0804 |
| Carboxypeptidase M                                  | CPM     | 9.8248   | 5.6875   | -1.1094 | 0.0000 | 0.0004 | 0.4765 |
| Copine-1                                            | CPNE1   | 1.7863   | -0.3434  | -1.5544 | 0.2165 | 0.8356 | 0.2976 |
| Cluster of Copine-3                                 | CPNE3   | -1.6208  | -0.9673  | 0.1545  | 0.2695 | 0.5260 | 0.9252 |

|                                                                                   |        |          |         |         |        |        |        |
|-----------------------------------------------------------------------------------|--------|----------|---------|---------|--------|--------|--------|
| Cluster of Isoform 3 of Carbamoyl-phosphate synthase [ammonia], mitochondrial     | CPS1   | -23.0164 | -1.6832 | 14.0302 | 0.0000 | 0.2285 | 0.0000 |
| Cluster of Isoform 3 of Cleavage and polyadenylation specificity factor subunit 6 | CPSF6  | -3.5533  | -0.4309 | 1.9980  | 0.0129 | 0.7991 | 0.1681 |
| Isoform 2 of Carnitine O-palmitoyltransferase 1, liver isoform                    | CPT1A  | 3.1299   | 2.4481  | 0.2713  | 0.0272 | 0.0752 | 0.8827 |
| Cluster of Complement receptor type 1                                             | CR1    | -1.1547  | -3.2250 | -2.3801 | 0.4545 | 0.0202 | 0.0934 |
| Cluster of Protein crumbs homolog 2                                               | CRB2   | -1.3868  | -3.2507 | -2.2472 | 0.3519 | 0.0195 | 0.1164 |
| Cysteine-rich motor neuron 1 protein                                              | CRIM1  | 2.5655   | 1.1322  | -0.6363 | 0.0685 | 0.4445 | 0.7047 |
| Isoform 2 of Cysteine-rich protein 2                                              | CRIP2  | -1.2575  | -1.7452 | -0.8569 | 0.4057 | 0.2111 | 0.6017 |
| Isoform Crk-I of Adapter molecule crk                                             | CRK    | 0.6679   | 0.3234  | -0.1375 | 0.7032 | 0.8449 | 0.9316 |
| C-reactive protein                                                                | CRP    | -12.2265 | -1.0631 | 7.2870  | 0.0000 | 0.4763 | 0.0000 |
| Alpha-crystallin B chain                                                          | CRYAB  | 2.1542   | 1.7232  | 0.2243  | 0.1284 | 0.2168 | 0.8979 |
| Isoform 2 of Lambda-crystallin homolog                                            | CRYL1  | -0.4780  | -0.7499 | -0.4107 | 0.7866 | 0.6411 | 0.8158 |
| Isoform 3 of Quinone oxidoreductase                                               | CRYZ   | -2.1002  | -1.4482 | 0.0089  | 0.1403 | 0.3103 | 0.9937 |
| Citrate synthase, mitochondrial                                                   | CS     | 0.4989   | -0.8509 | -1.1756 | 0.7785 | 0.5852 | 0.4493 |
| Isoform 3 of Exportin-2                                                           | CSE1L  | 0.7038   | -0.3757 | -0.8485 | 0.6868 | 0.8248 | 0.6052 |
| Chondroitin sulfate proteoglycan 4                                                | CSPG4  | -0.3980  | 1.2805  | 1.5287  | 0.8245 | 0.3789 | 0.3079 |
| Cysteine and glycine-rich protein 1                                               | CSRP1  | -1.6163  | -3.9041 | -2.7325 | 0.2711 | 0.0068 | 0.0560 |
| Cysteine and glycine-rich protein 2                                               | CSRP2  | 9.6445   | 6.2532  | -0.4311 | 0.0000 | 0.0002 | 0.8046 |
| Cystatin-C                                                                        | CST3   | -11.3358 | -2.1749 | 5.5883  | 0.0000 | 0.1147 | 0.0005 |
| Cystatin-A                                                                        | CSTA   | -0.6020  | 5.7793  | 6.0853  | 0.7358 | 0.0003 | 0.0002 |
| Cystatin-B                                                                        | CSTB   | 2.2049   | -2.2146 | -3.6770 | 0.1193 | 0.1083 | 0.0129 |
| Catenin alpha-1                                                                   | CTNNA1 | 1.2144   | -3.3729 | -4.1396 | 0.4269 | 0.0158 | 0.0059 |
| Isoform 2 of Catenin alpha-2                                                      | CTNNA2 | -3.1681  | 0.3175  | 2.4704  | 0.0254 | 0.8460 | 0.0816 |
| Catenin beta-1                                                                    | CTNNB1 | -0.7007  | -0.9358 | -0.4415 | 0.6868 | 0.5409 | 0.7992 |
| Isoform 1AC of Catenin delta-1                                                    | CTNND1 | -0.9402  | 1.9351  | 2.5409  | 0.5592 | 0.1637 | 0.0733 |
| Cathepsin B                                                                       | CTSB   | -0.5312  | 0.3736  | 0.7288  | 0.7673 | 0.8252 | 0.6567 |
| Dipeptidyl peptidase 1                                                            | CTSC   | 8.7091   | 5.7434  | -0.2944 | 0.0000 | 0.0003 | 0.8763 |
| Cathepsin D                                                                       | CTSD   | -1.4501  | -0.3495 | 0.6449  | 0.3291 | 0.8337 | 0.7008 |
| Cathepsin G                                                                       | CTSG   | 11.7588  | 7.7294  | -0.4221 | 0.0000 | 0.0000 | 0.8088 |
| Cathepsin L1                                                                      | CTSL   | 12.4592  | 7.6436  | -0.9837 | 0.0000 | 0.0000 | 0.5283 |
| Cathepsin Z                                                                       | CTSZ   | 0.7236   | 0.8557  | 0.3472  | 0.6765 | 0.5840 | 0.8452 |
| Cluster of Src substrate cortactin                                                | CTTN   | -0.7363  | 0.2724  | 0.7692  | 0.6712 | 0.8663 | 0.6395 |
| Cubilin                                                                           | CUBN   | -1.6560  | -0.0907 | 1.0393  | 0.2597 | 0.9509 | 0.5073 |
| Isoform 2 of Cytochrome b5                                                        | CYB5A  | -20.3286 | -0.0621 | 13.7906 | 0.0000 | 0.9651 | 0.0000 |
| Isoform 2 of NADH-cytochrome b5 reductase 3                                       | CYB5R3 | 1.1999   | 0.9119  | 0.0778  | 0.4349 | 0.5526 | 0.9633 |

|                                                                                          |         |          |          |         |        |        |        |
|------------------------------------------------------------------------------------------|---------|----------|----------|---------|--------|--------|--------|
| Cytochrome c1, heme protein, mitochondrial                                               | CYC1    | -0.6003  | -5.7252  | -5.2130 | 0.7365 | 0.0003 | 0.0010 |
| Cluster of Cytoplasmic FMR1-interacting protein 1                                        | CYFIP1  | -3.8764  | -1.7417  | 0.9310  | 0.0072 | 0.2116 | 0.5553 |
| Dystroglycan                                                                             | DAG1    | -2.6370  | -0.3280  | 1.4747  | 0.0619 | 0.8438 | 0.3261 |
| Aspartate--tRNA ligase, cytoplasmic                                                      | DARS    | -0.7296  | 1.2174   | 1.6926  | 0.6741 | 0.4037 | 0.2532 |
| Isoform 2 of DAZ-associated protein 1                                                    | DAZAP1  | 8.9770   | 5.0616   | -1.1464 | 0.0000 | 0.0010 | 0.4607 |
| Cluster of Isoform 4 of Acyl-CoA-binding protein                                         | DBI     | -0.1681  | -13.8341 | 13.4703 | 0.9306 | 0.0000 | 0.0000 |
| Isoform 2 of Drebrin                                                                     | DBN1    | 3.0250   | 1.8661   | -0.2286 | 0.0326 | 0.1817 | 0.8970 |
| Cluster of Isoform 2 of Drebrin-like protein                                             | DBNL    | -1.5194  | -1.4477  | -0.3863 | 0.3049 | 0.3103 | 0.8275 |
| Dermcidin                                                                                | DCD     | -0.4038  | 3.9625   | 4.1663  | 0.8234 | 0.0061 | 0.0056 |
| Cluster of Isoform 3 of Dynactin subunit 1                                               | DCTN1   | -1.3625  | 0.6509   | 1.5675  | 0.3629 | 0.6880 | 0.2934 |
| Isoform 2 of Dynactin subunit 2                                                          | DCTN2   | -1.5710  | -0.2989  | 0.7769  | 0.2881 | 0.8551 | 0.6381 |
| Isoform 2 of Dynactin subunit 4                                                          | DCTN4   | -0.9963  | -5.4604  | -4.6831 | 0.5326 | 0.0005 | 0.0024 |
| L-xylulose reductase                                                                     | DCXR    | -24.1547 | -2.1224  | 14.3745 | 0.0000 | 0.1230 | 0.0000 |
| N(G),N(G)-dimethylarginine dimethylaminohydrolase 2                                      | DDAH2   | 1.4130   | 0.4604   | -0.5107 | 0.3419 | 0.7859 | 0.7702 |
| Dendrin                                                                                  | DDN     | -7.5455  | -8.8555  | -3.5545 | 0.0000 | 0.0000 | 0.0157 |
| Cluster of Dolichyl-diphosphooligosaccharide--protein glycosyltransferase 48 kDa subunit | DDOST   | 12.0493  | 7.0473   | -1.2899 | 0.0000 | 0.0000 | 0.3984 |
| DDRKG domain-containing protein 1                                                        | DDRKG1  | 8.4711   | 4.8240   | -1.0350 | 0.0000 | 0.0014 | 0.5089 |
| ATP-dependent RNA helicase DDX1                                                          | DDX1    | 0.8232   | -0.6012  | -1.1513 | 0.6229 | 0.7089 | 0.4582 |
| Cluster of Isoform 4 of Probable ATP-dependent RNA helicase DDX17                        | DDX17   | 16.5665  | 9.6136   | -1.8478 | 0.0000 | 0.0000 | 0.2082 |
| Cluster of Isoform 2 of Spliceosome RNA helicase DDX39B                                  | DDX39B  | 0.8337   | -0.7471  | -1.3017 | 0.6182 | 0.6423 | 0.3922 |
| Cluster of Isoform 2 of ATP-dependent RNA helicase DDX3X                                 | DDX3X   | -0.7151  | 2.5158   | 2.9577  | 0.6802 | 0.0670 | 0.0392 |
| Probable ATP-dependent RNA helicase DDX5                                                 | DDX5    | 1.7165   | 8.4887   | 7.1662  | 0.2386 | 0.0000 | 0.0000 |
| Probable ATP-dependent RNA helicase DDX6                                                 | DDX6    | -0.6151  | -1.2996  | -0.8570 | 0.7314 | 0.3714 | 0.6017 |
| Isoform 2 of 2,4-dienoyl-CoA reductase, mitochondrial                                    | DECR1   | -17.0172 | 1.8347   | 13.3970 | 0.0000 | 0.1902 | 0.0000 |
| Protein DEK                                                                              | DEK     | 7.8724   | 4.9046   | -0.5480 | 0.0000 | 0.0013 | 0.7489 |
| Isoform 2 of DENN domain-containing protein 4C                                           | DENND4C | -1.5299  | -1.7841  | -0.7095 | 0.3015 | 0.2021 | 0.6631 |
| Deoxyribose-phosphate aldolase                                                           | DERA    | -8.2658  | -0.4052  | 5.2343  | 0.0000 | 0.8095 | 0.0010 |
| Pre-mRNA-splicing factor ATP-dependent RNA helicase DHX15                                | DHX15   | 4.6351   | 2.9487   | -0.2627 | 0.0018 | 0.0328 | 0.8840 |
| ATP-dependent RNA helicase A                                                             | DHX9    | 1.6821   | 0.5984   | -0.5585 | 0.2490 | 0.7093 | 0.7447 |

|                                                                                                                             |          |          |          |         |        |        |        |
|-----------------------------------------------------------------------------------------------------------------------------|----------|----------|----------|---------|--------|--------|--------|
| Dihydrolipoyllysine-residue acetyltransferase component of pyruvate dehydrogenase complex, mitochondrial                    | DLAT     | -0.9179  | 2.8327   | 3.4072  | 0.5695 | 0.0405 | 0.0194 |
| Isoform 2 of Dihydrolipoyl dehydrogenase, mitochondrial                                                                     | DLD      | -0.8233  | 0.0263   | 0.5869  | 0.6229 | 0.9857 | 0.7295 |
| Cluster of Dihydrolipoyllysine-residue succinyltransferase component of 2-oxoglutarate dehydrogenase complex, mitochondrial | DLST     | -0.0837  | 5.7091   | 5.6632  | 0.9634 | 0.0003 | 0.0005 |
| DnaJ homolog subfamily A member 2                                                                                           | DNAJA2   | -0.4322  | 0.0947   | 0.3874  | 0.8111 | 0.9509 | 0.8275 |
| Isoform 6 of Dynamin-1-like protein                                                                                         | DNM1L    | 1.1992   | -0.7071  | -1.5115 | 0.4349 | 0.6575 | 0.3145 |
| Aspartyl aminopeptidase                                                                                                     | DNPEP    | 1.6527   | 0.1186   | -1.0097 | 0.2600 | 0.9410 | 0.5174 |
| 2'-deoxynucleoside 5'-phosphate N-hydrolase 1                                                                               | DNPH1    | -0.3350  | -10.4708 | 10.0539 | 0.8538 | 0.0000 | 0.0000 |
| Dipeptidase 1                                                                                                               | DPEP1    | -14.7904 | -3.7729  | 6.3730  | 0.0000 | 0.0085 | 0.0002 |
| Isoform 4 of Dipeptidyl peptidase 3                                                                                         | DPP3     | -0.9344  | -0.4382  | 0.2064  | 0.5612 | 0.7972 | 0.9038 |
| Dipeptidyl peptidase 4                                                                                                      | DPP4     | 8.6919   | 5.3026   | -0.7155 | 0.0000 | 0.0006 | 0.6617 |
| Isoform DPPX-S of Dipeptidyl aminopeptidase-like protein 6                                                                  | DPP6     | -0.0953  | -4.0944  | -3.9557 | 0.9589 | 0.0049 | 0.0079 |
| Dihydropyrimidinase                                                                                                         | DPYS     | -8.4139  | -7.2444  | -1.3807 | 0.0000 | 0.0000 | 0.3607 |
| Dihydropyrimidinase-related protein 2                                                                                       | DPYSL2   | -0.6721  | -3.4891  | -2.9682 | 0.7017 | 0.0131 | 0.0386 |
| Isoform LCRMP-4 of Dihydropyrimidinase-related protein 3                                                                    | DPYSL3   | -0.4531  | -2.3732  | -2.0216 | 0.8004 | 0.0848 | 0.1624 |
| Isoform 1B of Desmocollin-1                                                                                                 | DSC1     | -7.5328  | -0.7377  | 4.4084  | 0.0000 | 0.6459 | 0.0038 |
| Desmoglein-1                                                                                                                | DSG1     | -1.6214  | -0.9094  | 0.2118  | 0.2695 | 0.5533 | 0.9035 |
| Desmoplakin                                                                                                                 | DSP      | 0.7952   | -0.7401  | -1.2687 | 0.6378 | 0.6452 | 0.4080 |
| Cluster of Dystonin                                                                                                         | DST      | -0.0292  | -0.8471  | -0.8119 | 0.9849 | 0.5871 | 0.6229 |
| Isoform 2 of Destrin                                                                                                        | DSTN     | 1.0785   | -1.0535  | -1.7694 | 0.4945 | 0.4813 | 0.2294 |
| Dual specificity protein phosphatase 3                                                                                      | DUSP3    | 1.2244   | 6.0024   | 5.0599  | 0.4225 | 0.0002 | 0.0013 |
| Cytoplasmic dynein 1 heavy chain 1                                                                                          | DYNC1H1  | 0.6076   | -0.6100  | -1.0130 | 0.7343 | 0.7076 | 0.5173 |
| Isoform 2B of Cytoplasmic dynein 1 intermediate chain 2                                                                     | DYNC1I2  | -0.3135  | -0.6196  | -0.3949 | 0.8646 | 0.7041 | 0.8251 |
| Isoform 2 of Cytoplasmic dynein 1 light intermediate chain 2                                                                | DYNC1LI2 | -0.3790  | 1.8730   | 2.0975  | 0.8330 | 0.1800 | 0.1448 |
| Dynein light chain 1, cytoplasmic                                                                                           | DYNLL1   | -0.4646  | -11.2538 | 10.7344 | 0.7960 | 0.0000 | 0.0000 |
| Dynein light chain roadblock-type 1                                                                                         | DYNLRB1  | -2.1508  | -0.8526  | 0.6282  | 0.1287 | 0.5846 | 0.7087 |
| Isoform 10 of Dysferlin                                                                                                     | DYSF     | 0.7815   | -0.0694  | -0.6006 | 0.6458 | 0.9607 | 0.7238 |
| Delta(3,5)-Delta(2,4)-dienoyl-CoA isomerase, mitochondrial                                                                  | ECH1     | 0.5733   | 0.4789   | 0.0797  | 0.7463 | 0.7782 | 0.9633 |
| Ethylmalonyl-CoA decarboxylase                                                                                              | ECHDC1   | -2.8905  | -4.6378  | -2.5847 | 0.0410 | 0.0019 | 0.0690 |

|                                                                               |         |          |         |         |        |        |        |
|-------------------------------------------------------------------------------|---------|----------|---------|---------|--------|--------|--------|
| Enoyl-CoA hydratase, mitochondrial                                            | ECHS1   | -2.3108  | -0.0081 | 1.5667  | 0.1020 | 0.9937 | 0.2934 |
| Isoform 2 of Enoyl-CoA delta isomerase 1, mitochondrial                       | ECI1    | 0.0486   | 3.4729  | 3.3772  | 0.9744 | 0.0133 | 0.0201 |
| Isoform 4 of Extracellular matrix protein 1                                   | ECM1    | 7.1760   | 4.4143  | -0.5548 | 0.0000 | 0.0028 | 0.7458 |
| Enhancer of mRNA-decapping protein 4                                          | EDC4    | 7.1172   | 3.6618  | -1.2538 | 0.0000 | 0.0100 | 0.4148 |
| Early endosome antigen 1                                                      | EEA1    | -0.0820  | -3.4839 | -3.3652 | 0.9634 | 0.0131 | 0.0204 |
| Cluster of Elongation factor 1-alpha 1                                        | EEF1A1  | 0.1909   | -0.2216 | -0.3477 | 0.9202 | 0.8905 | 0.8452 |
| Elongation factor 1-beta                                                      | EEF1B2  | 0.2205   | -1.7355 | -1.8545 | 0.9046 | 0.2131 | 0.2068 |
| Cluster of Isoform 2 of Elongation factor 1-delta                             | EEF1D   | 2.3082   | 0.4099  | -1.1702 | 0.1023 | 0.8062 | 0.4506 |
| Isoform 2 of Elongation factor 1-gamma                                        | EEF1G   | 0.4336   | -0.7258 | -1.0081 | 0.8107 | 0.6504 | 0.5180 |
| Elongation factor 2                                                           | EEF2    | 2.2862   | 0.1935  | -1.3678 | 0.1052 | 0.9040 | 0.3657 |
| Isoform 2 of EGF-containing fibulin-like extracellular matrix protein 1       | EFEMP1  | -0.6535  | 5.8722  | 6.2116  | 0.7090 | 0.0003 | 0.0002 |
| Cluster of EF-hand domain-containing protein D1                               | EFHD1   | 0.4619   | 1.3102  | 0.9719  | 0.7977 | 0.3684 | 0.5336 |
| Ephrin-B1                                                                     | EFNB1   | 1.3849   | 10.7678 | 9.6301  | 0.3525 | 0.0000 | 0.0000 |
| Isoform 2 of 116 kDa U5 small nuclear ribonucleoprotein component             | EFTUD2  | 0.9495   | 2.2909  | 1.6026  | 0.5564 | 0.0963 | 0.2814 |
| EH domain-containing protein 2                                                | EHD2    | 0.9392   | 2.2101  | 1.5303  | 0.5593 | 0.1090 | 0.3079 |
| Cluster of EH domain-containing protein 3                                     | EHD3    | -1.6388  | -1.3044 | -0.1642 | 0.2650 | 0.3697 | 0.9236 |
| EH domain-containing protein 4                                                | EHD4    | -2.5846  | -1.7413 | 0.0512  | 0.0672 | 0.2116 | 0.9730 |
| Peroxisomal bifunctional enzyme                                               | EHHADH  | -12.9141 | -2.1185 | 6.7192  | 0.0000 | 0.1236 | 0.0001 |
| Eukaryotic translation initiation factor 1A, Y-chromosomal                    | EIF1AY  | 9.9406   | 7.9048  | 0.9890  | 0.0000 | 0.0000 | 0.5262 |
| Isoform 2 of Interferon-induced, double-stranded RNA-activated protein kinase | EIF2AK2 | -1.4283  | -2.6048 | -1.5847 | 0.3368 | 0.0585 | 0.2875 |
| Eukaryotic translation initiation factor 2 subunit 1                          | EIF2S1  | 8.0877   | 5.7904  | 0.1753  | 0.0000 | 0.0003 | 0.9197 |
| Isoform 2 of Eukaryotic translation initiation factor 3 subunit A             | EIF3A   | 0.0742   | 3.6135  | 3.4978  | 0.9659 | 0.0108 | 0.0171 |
| Eukaryotic translation initiation factor 3 subunit I                          | EIF3I   | 2.8624   | -1.0463 | -2.9778 | 0.0428 | 0.4847 | 0.0381 |
| Cluster of Isoform 2 of Eukaryotic initiation factor 4A-II                    | EIF4A2  | 2.5823   | 0.7846  | -0.9890 | 0.0672 | 0.6214 | 0.5262 |
| Eukaryotic initiation factor 4A-III                                           | EIF4A3  | 1.8228   | 0.0715  | -1.1718 | 0.2076 | 0.9602 | 0.4501 |
| Eukaryotic translation initiation factor 4B                                   | EIF4B   | -0.3918  | 2.1760  | 2.4037  | 0.8256 | 0.1147 | 0.0913 |
| Isoform 7 of Eukaryotic translation initiation factor 4 gamma 1               | EIF4G1  | 1.9968   | 1.9360  | 0.5405  | 0.1633 | 0.1637 | 0.7539 |
| Isoform Short of Eukaryotic translation initiation factor 4H                  | EIF4H   | 0.2960   | -0.1896 | -0.3879 | 0.8710 | 0.9044 | 0.8275 |

|                                                                                      |         |         |         |         |        |        |        |
|--------------------------------------------------------------------------------------|---------|---------|---------|---------|--------|--------|--------|
| Isoform 2 of Eukaryotic translation initiation factor 5A-1                           | EIF5A   | -1.8833 | -1.2517 | 0.0541  | 0.1913 | 0.3905 | 0.9729 |
| Neutrophil elastase                                                                  | ELANE   | 8.3978  | 5.5548  | -0.2674 | 0.0000 | 0.0004 | 0.8827 |
| Isoform 2 of ELAV-like protein 1                                                     | ELAVL1  | 3.3553  | 11.9475 | 9.4460  | 0.0184 | 0.0000 | 0.0000 |
| Engulfment and cell motility protein 2                                               | ELMO2   | -1.1027 | -0.2510 | 0.5049  | 0.4802 | 0.8771 | 0.7716 |
| Emerin                                                                               | EMD     | -1.5522 | 5.3298  | 6.2914  | 0.2939 | 0.0006 | 0.0002 |
| Cluster of EMILIN-1                                                                  | EMILIN1 | 0.2830  | 3.3359  | 3.0830  | 0.8743 | 0.0169 | 0.0318 |
| Isoform 2 of Echinoderm microtubule-associated protein-like 2                        | EML2    | 0.6495  | -2.1421 | -2.5461 | 0.7111 | 0.1199 | 0.0732 |
| Isoform 2 of Echinoderm microtubule-associated protein-like 4                        | EML4    | -0.7031 | -4.6909 | -4.1273 | 0.6868 | 0.0018 | 0.0060 |
| Endonuclease domain-containing 1 protein                                             | ENDOD1  | -0.4477 | -0.1634 | 0.1446  | 0.8022 | 0.9155 | 0.9298 |
| Isoform Short of Endoglin                                                            | ENG     | -1.7541 | -1.6483 | -0.4234 | 0.2256 | 0.2406 | 0.8084 |
| Alpha-enolase                                                                        | ENO1    | 1.4838  | -1.3857 | -2.3718 | 0.3177 | 0.3332 | 0.0947 |
| Glutamyl aminopeptidase                                                              | ENPEP   | -1.6123 | -4.6504 | -3.4680 | 0.2718 | 0.0019 | 0.0179 |
| Band 4.1-like protein 2                                                              | EPB41L2 | 0.7905  | 1.7500  | 1.1798  | 0.6401 | 0.2101 | 0.4488 |
| Cluster of Isoform 3 of Band 4.1-like protein 5                                      | EPB41L5 | 1.2984  | 3.0491  | 2.1094  | 0.3904 | 0.0274 | 0.1424 |
| Epoxide hydrolase 1                                                                  | EPHX1   | -3.2438 | 4.3371  | 6.4692  | 0.0226 | 0.0032 | 0.0001 |
| Bifunctional epoxide hydrolase 2                                                     | EPHX2   | 2.2921  | 1.3931  | -0.1938 | 0.1044 | 0.3296 | 0.9094 |
| Isoform 2 of Epsin-1                                                                 | EPN1    | 0.7256  | -8.7592 | -9.0958 | 0.6759 | 0.0000 | 0.0000 |
| Epiplakin                                                                            | EPPK1   | -0.2739 | 0.3645  | 0.5446  | 0.8794 | 0.8268 | 0.7511 |
| Bifunctional glutamate/proline--tRNA ligase                                          | EPRS    | -0.6848 | -0.3359 | 0.1367  | 0.6935 | 0.8399 | 0.9316 |
| Isoform 2 of Endoplasmic reticulum aminopeptidase 1                                  | ERAP1   | 2.5672  | 2.5290  | 0.7342  | 0.0685 | 0.0657 | 0.6551 |
| Isoform 2 of Endoplasmic reticulum-Golgi intermediate compartment protein 1          | ERGIC1  | 7.3014  | 3.7199  | -1.3223 | 0.0000 | 0.0091 | 0.3849 |
| Endoplasmic reticulum resident protein 29                                            | ERP29   | -0.2013 | 4.2295  | 4.2904  | 0.9164 | 0.0039 | 0.0046 |
| Endoplasmic reticulum resident protein 44                                            | ERP44   | -1.3929 | -1.0928 | -0.1240 | 0.3506 | 0.4656 | 0.9385 |
| Endothelial cell-selective adhesion molecule                                         | ESAM    | -1.4022 | -3.3328 | -2.3173 | 0.3466 | 0.0169 | 0.1035 |
| S-formylglutathione hydrolase                                                        | ESD     | 0.3306  | -2.5519 | -2.7312 | 0.8561 | 0.0633 | 0.0560 |
| Isoform 2 of Extended synaptotagmin-1                                                | ESYT1   | 2.5376  | 0.6059  | -1.1341 | 0.0713 | 0.7083 | 0.4652 |
| Isoform 2 of Electron transfer flavoprotein subunit alpha, mitochondrial             | ETFA    | -7.0807 | -1.2981 | 3.5500  | 0.0000 | 0.3714 | 0.0157 |
| Isoform 2 of Electron transfer flavoprotein subunit beta                             | ETFB    | -7.2630 | 0.2558  | 5.2001  | 0.0000 | 0.8753 | 0.0010 |
| Isoform 2 of Electron transfer flavoprotein-ubiquinone oxidoreductase, mitochondrial | ETFDH   | -0.5053 | -0.9366 | -0.5754 | 0.7769 | 0.5409 | 0.7344 |
| Protein eva-1 homolog B                                                              | EVA1B   | -2.3607 | -4.0688 | -2.3870 | 0.0945 | 0.0051 | 0.0931 |



|                                                                    |         |          |          |         |        |        |        |
|--------------------------------------------------------------------|---------|----------|----------|---------|--------|--------|--------|
| Cluster of Isoform 3 of RNA-binding protein EWS                    | EWSR1   | 0.1275   | -1.4470  | -1.5077 | 0.9469 | 0.3103 | 0.3152 |
| Exocyst complex component 3-like protein 2                         | EXOC3L2 | -0.5902  | -3.7642  | -3.2942 | 0.7395 | 0.0086 | 0.0232 |
| Ezrin                                                              | EZR     | -0.7491  | -3.8423  | -3.2626 | 0.6632 | 0.0075 | 0.0242 |
| Coagulation factor XII                                             | F12     | 7.1800   | 5.0731   | 0.0894  | 0.0000 | 0.0009 | 0.9590 |
| Prothrombin                                                        | F2      | 1.8782   | -0.3378  | -1.6115 | 0.1915 | 0.8390 | 0.2785 |
| Coagulation factor IX                                              | F9      | 2.1709   | 1.1587   | -0.3414 | 0.1251 | 0.4314 | 0.8469 |
| Fatty acid-binding protein, liver                                  | FABP1   | -18.1435 | -13.6510 | -1.0423 | 0.0000 | 0.0000 | 0.5070 |
| Fatty acid-binding protein, adipocyte                              | FABP4   | 1.1219   | 0.0836   | -0.6824 | 0.4705 | 0.9542 | 0.6769 |
| Fatty acid-binding protein 5                                       | FABP5   | 1.9247   | 8.6403   | 7.1732  | 0.1809 | 0.0000 | 0.0000 |
| Fumarylacetoacetase                                                | FAH     | -2.2674  | -1.6503  | -0.0756 | 0.1084 | 0.2401 | 0.9633 |
| Isoform D of Constitutive coactivator of PPAR-gamma-like protein 1 | FAM120A | -0.6607  | -3.7913  | -3.2728 | 0.7050 | 0.0082 | 0.0239 |
| Protein FAM98B                                                     | FAM98B  | 2.2574   | 1.1707   | -0.3886 | 0.1101 | 0.4266 | 0.8275 |
| Cluster of FERM, ARHGEF and pleckstrin domain-containing protein 1 | FARP1   | -4.8561  | -0.6187  | 2.7013  | 0.0012 | 0.7041 | 0.0581 |
| Isoform 2 of Phenylalanine--tRNA ligase alpha subunit              | FARSA   | -3.6449  | 1.1373   | 3.6004  | 0.0111 | 0.4427 | 0.0148 |
| Fatty acid synthase                                                | FASN    | -0.5371  | 0.8106   | 1.1620  | 0.7673 | 0.6058 | 0.4529 |
| Isoform 3 of Filamin-binding LIM protein 1                         | FBLIM1  | 0.2675   | 0.3545   | 0.1659  | 0.8814 | 0.8324 | 0.9236 |
| Cluster of Fibulin-1                                               | FBLN1   | -1.7898  | -0.8645  | 0.3706  | 0.2158 | 0.5785 | 0.8357 |
| Fibulin-5                                                          | FBLN5   | -1.6791  | 2.9810   | 4.0714  | 0.2499 | 0.0311 | 0.0065 |
| Fibrillin-1                                                        | FBN1    | 1.5836   | -0.5692  | -1.6380 | 0.2833 | 0.7245 | 0.2711 |
| Fibrillin-2                                                        | FBN2    | -1.2933  | 4.7971   | 5.5918  | 0.3917 | 0.0015 | 0.0005 |
| Fructose-1,6-bisphosphatase 1                                      | FBP1    | -7.0298  | -8.2100  | -3.2720 | 0.0000 | 0.0000 | 0.0239 |
| Cluster of Isoform 3 of Fermitin family homolog 2                  | FERMT2  | 0.0131   | -3.4162  | -3.3636 | 0.9947 | 0.0147 | 0.0204 |
| Isoform 2 of Fermitin family homolog 3                             | FERMT3  | -0.9153  | 0.7089   | 1.3198  | 0.5704 | 0.6575 | 0.3853 |
| Isoform 2 of Fibrinogen alpha chain                                | FGA     | -0.6078  | -0.7253  | -0.2981 | 0.7343 | 0.6504 | 0.8746 |
| Fibrinogen beta chain                                              | FGB     | -0.8192  | -0.7597  | -0.1878 | 0.6243 | 0.6351 | 0.9128 |
| Fibroblast growth factor 1                                         | FGF1    | 1.5469   | -1.1097  | -2.1437 | 0.2960 | 0.4553 | 0.1354 |
| Isoform Gamma-A of Fibrinogen gamma chain                          | FGG     | -1.0111  | -1.2015  | -0.4909 | 0.5264 | 0.4121 | 0.7763 |
| Fibrinogen-like protein 1                                          | FGL1    | 12.9712  | 9.6351   | 0.6231  | 0.0000 | 0.0000 | 0.7114 |
| Fumarate hydratase, mitochondrial                                  | FH      | -1.2464  | 1.7683   | 2.5857  | 0.4110 | 0.2054 | 0.0690 |
| Cluster of Isoform 5 of Four and a half LIM domains protein 1      | FHL1    | 2.3842   | -1.4981  | -3.0957 | 0.0911 | 0.2918 | 0.0312 |
| Four and a half LIM domains protein 2                              | FHL2    | 0.8743   | -1.4326  | -2.0025 | 0.5961 | 0.3149 | 0.1670 |
| Four and a half LIM domains protein 3                              | FHL3    | 3.8582   | -2.6406  | -5.2219 | 0.0075 | 0.0557 | 0.0010 |
| Mitochondrial fission 1 protein                                    | FIS1    | 0.6346   | -8.7825  | -9.0567 | 0.7183 | 0.0000 | 0.0000 |

|                                                                  |        |         |         |         |        |        |        |
|------------------------------------------------------------------|--------|---------|---------|---------|--------|--------|--------|
| Peptidyl-prolyl cis-trans isomerase FKBP1A                       | FKBP1A | -1.8110 | -1.5500 | -0.2881 | 0.2109 | 0.2709 | 0.8795 |
| Peptidyl-prolyl cis-trans isomerase FKBP2                        | FKBP2  | -0.8972 | -0.8422 | -0.2157 | 0.5819 | 0.5897 | 0.9016 |
| Cluster of Peptidyl-prolyl cis-trans isomerase FKBP3             | FKBP3  | 3.6275  | -1.4520 | -3.8976 | 0.0114 | 0.3098 | 0.0087 |
| Peptidyl-prolyl cis-trans isomerase FKBP5                        | FKBP5  | -1.3916 | 2.3170  | 3.2235  | 0.3506 | 0.0920 | 0.0258 |
| Filaggrin-2                                                      | FLG2   | -3.5117 | -1.3351 | 1.0818  | 0.0138 | 0.3566 | 0.4898 |
| Isoform 2 of Filamin-A                                           | FLNA   | 0.2837  | -0.1906 | -0.3805 | 0.8743 | 0.9043 | 0.8304 |
| Isoform 8 of Filamin-B                                           | FLNB   | 2.2443  | 1.1861  | -0.3645 | 0.1127 | 0.4198 | 0.8384 |
| Isoform 2 of Filamin-C                                           | FLNC   | 2.8793  | -1.1846 | -3.1252 | 0.0418 | 0.4198 | 0.0300 |
| Isoform 2 of Flotillin-1                                         | FLOT1  | -0.5939 | -1.0125 | -0.5895 | 0.7388 | 0.5041 | 0.7284 |
| Flotillin-2                                                      | FLOT2  | -3.7450 | -1.7617 | 0.8219  | 0.0092 | 0.2072 | 0.6188 |
| Cluster of Vascular endothelial growth factor receptor 1         | FLT1   | -2.7641 | -4.1377 | -2.1797 | 0.0502 | 0.0045 | 0.1284 |
| Isoform 17 of Fibronectin                                        | FN1    | -0.2635 | 0.3192  | 0.4929  | 0.8834 | 0.8457 | 0.7755 |
| Fascin                                                           | FSCN1  | -0.1739 | -2.8824 | -2.7120 | 0.9286 | 0.0370 | 0.0575 |
| Isoform C of Formimidoyltransferase-cyclodeaminase               | FTCD   | -6.3733 | -1.7721 | 2.6025  | 0.0001 | 0.2046 | 0.0677 |
| Ferritin light chain                                             | FTL    | -4.4388 | 0.1872  | 3.2084  | 0.0026 | 0.9044 | 0.0263 |
| Alpha-ketoglutarate-dependent dioxygenase FTO                    | FTO    | -1.0204 | -0.4263 | 0.2766  | 0.5238 | 0.7991 | 0.8827 |
| Isoform 2 of Far upstream element-binding protein 1              | FUBP1  | 1.3896  | -1.4339 | -2.3549 | 0.3508 | 0.3149 | 0.0976 |
| Isoform Short of RNA-binding protein FUS                         | FUS    | 0.7990  | -1.8028 | -2.3148 | 0.6356 | 0.1976 | 0.1038 |
| Ras GTPase-activating protein-binding protein 1                  | G3BP1  | 1.6517  | 3.6988  | 2.5067  | 0.2600 | 0.0094 | 0.0775 |
| Lysosomal alpha-glucosidase                                      | GAA    | -0.8986 | 2.3686  | 2.9382  | 0.5814 | 0.0853 | 0.0401 |
| Aldose 1-epimerase                                               | GALM   | -3.1937 | -2.6767 | -0.4523 | 0.0243 | 0.0525 | 0.7914 |
| Neutral alpha-glucosidase AB                                     | GANAB  | -0.0053 | -1.0729 | -1.0500 | 0.9987 | 0.4738 | 0.5043 |
| Cluster of Isoform 2 of Glyceraldehyde-3-phosphate dehydrogenase | GAPDH  | 0.1739  | -2.6354 | -2.7064 | 0.9286 | 0.0559 | 0.0578 |
| Glycine--tRNA ligase                                             | GARS1  | 3.2138  | 0.2784  | -1.9164 | 0.0236 | 0.8640 | 0.1900 |
| Growth arrest-specific protein 2                                 | GAS2   | 1.9357  | -2.7590 | -4.0282 | 0.1779 | 0.0457 | 0.0070 |
| Isoform 2 of Glycine amidinotransferase, mitochondrial           | GATM   | -1.3110 | -1.5125 | -0.5920 | 0.3844 | 0.2861 | 0.7284 |
| 1,4-alpha-glucan-branching enzyme                                | GBE1   | 1.0640  | -0.2107 | -0.9319 | 0.5027 | 0.8954 | 0.5553 |
| Guanylate-binding protein 1                                      | GBP1   | 6.9955  | 3.6677  | -1.1651 | 0.0000 | 0.0100 | 0.4526 |
| Isoform 3 of Vitamin D-binding protein                           | GC     | -0.3030 | -3.5400 | -3.2698 | 0.8704 | 0.0121 | 0.0239 |
| eIF-2-alpha kinase activator GCN1                                | GCN1   | 0.8469  | -0.6181 | -1.1840 | 0.6097 | 0.7041 | 0.4470 |
| Isoform 2 of Guanine deaminase                                   | GDA    | -0.4569 | -0.4200 | -0.1011 | 0.7998 | 0.7997 | 0.9542 |
| Rab GDP dissociation inhibitor alpha                             | GDI1   | -0.7430 | -3.4428 | -2.8744 | 0.6676 | 0.0141 | 0.0438 |

|                                                                                       |         |          |          |         |        |        |        |
|---------------------------------------------------------------------------------------|---------|----------|----------|---------|--------|--------|--------|
| Rab GDP dissociation inhibitor beta                                                   | GDI2    | 0.7781   | -2.0811  | -2.5737 | 0.6478 | 0.1294 | 0.0701 |
| Gamma-glutamylcyclotransferase                                                        | GGCT    | -9.4588  | 0.3892   | 6.8273  | 0.0000 | 0.8182 | 0.0001 |
| GTPase IMAP family member 4                                                           | GIMAP4  | -5.4695  | -0.3036  | 3.4287  | 0.0004 | 0.8527 | 0.0189 |
| GTPase IMAP family member 8                                                           | GIMAP8  | -3.1307  | -1.8410  | 0.3253  | 0.0272 | 0.1883 | 0.8578 |
| Isoform 3 of ARF GTPase-activating protein GIT1                                       | GIT1    | 0.7678   | 1.9391   | 1.3810  | 0.6530 | 0.1630 | 0.3607 |
| Gap junction alpha-5 protein                                                          | GJA5    | 0.0605   | -7.2598  | -7.1702 | 0.9698 | 0.0000 | 0.0000 |
| Isoform 2 of Golgi apparatus protein 1                                                | GLG1    | -1.4719  | -0.9443  | 0.0756  | 0.3220 | 0.5377 | 0.9633 |
| Isoform 2 of Lactoylglutathione lyase                                                 | GLO1    | -1.4228  | -1.0085  | -0.0209 | 0.3384 | 0.5052 | 0.9892 |
| Glutaredoxin-1                                                                        | GLRX    | 0.4240   | -11.9948 | 12.0676 | 0.8141 | 0.0000 | 0.0000 |
| Isoform 3 of Glutaminase kidney isoform, mitochondrial                                | GLS     | -0.8598  | 2.6743   | 3.2120  | 0.6032 | 0.0526 | 0.0262 |
| Cluster of Glutamate dehydrogenase 1, mitochondrial                                   | GLUD1   | -0.3005  | -0.9024  | -0.6814 | 0.8710 | 0.5568 | 0.6769 |
| GDP-mannose 4,6 dehydratase                                                           | GMDS    | -0.5614  | -3.5079  | -3.0621 | 0.7504 | 0.0128 | 0.0328 |
| Glia maturation factor beta                                                           | GMFB    | -14.8455 | -9.5348  | 0.7525  | 0.0000 | 0.0000 | 0.6453 |
| Cluster of Guanine nucleotide-binding protein subunit alpha-11                        | GNA11   | 0.5348   | 0.0107   | -0.3540 | 0.7673 | 0.9923 | 0.8432 |
| Cluster of Guanine nucleotide-binding protein G(i) subunit alpha-2                    | GNAI2   | -1.2963  | -1.6851  | -0.7715 | 0.3909 | 0.2280 | 0.6393 |
| Isoform Alpha-2 of Guanine nucleotide-binding protein G(o) subunit alpha              | GNAO1   | 16.3511  | 9.5377   | -1.7756 | 0.0000 | 0.0000 | 0.2281 |
| Guanine nucleotide-binding protein G(q) subunit alpha                                 | GNAQ    | -3.1054  | -3.4946  | -1.3157 | 0.0285 | 0.0130 | 0.3870 |
| Isoform XLas-2 of Guanine nucleotide-binding protein G(s) subunit alpha isoforms XLas | GNAS    | -0.1908  | -1.3159  | -1.1622 | 0.9202 | 0.3662 | 0.4529 |
| Guanine nucleotide-binding protein G(l)/G(s)/G(t) subunit beta-1                      | GNB1    | 0.6364   | -0.5782  | -1.0014 | 0.7174 | 0.7196 | 0.5203 |
| Cluster of Guanine nucleotide-binding protein G(l)/G(s)/G(t) subunit beta-2           | GNB2    | 0.4095   | -2.0816  | -2.3232 | 0.8205 | 0.1294 | 0.1025 |
| Guanine nucleotide-binding protein G(l)/G(s)/G(o) subunit gamma-12                    | GNG12   | -0.6471  | -10.7874 | 10.1521 | 0.7119 | 0.0000 | 0.0000 |
| Isoform 2 of Guanine nucleotide-binding protein-like 1                                | GNL1    | -1.2649  | 0.2082   | 1.0664  | 0.4036 | 0.8954 | 0.4956 |
| Cluster of Glucosamine-6-phosphate isomerase 1                                        | GNPDA1  | 0.0488   | -8.7364  | -8.6123 | 0.9744 | 0.0000 | 0.0000 |
| Isoform 3 of Golgi reassembly-stacking protein 2                                      | GORASP2 | 1.0541   | -1.9610  | -2.6439 | 0.5074 | 0.1576 | 0.0634 |
| Isoform 2 of Aspartate aminotransferase, cytoplasmic                                  | GOT1    | -2.1745  | -2.2501  | -0.7278 | 0.1245 | 0.1021 | 0.6567 |
| Aspartate aminotransferase, mitochondrial                                             | GOT2    | 0.0000   | 4.3848   | 4.3058  | 1.0000 | 0.0030 | 0.0045 |

|                                                                  |        |          |         |         |        |        |        |
|------------------------------------------------------------------|--------|----------|---------|---------|--------|--------|--------|
| Glycerol-3-phosphate dehydrogenase [NAD(+)], cytoplasmic         | GPD1   | 0.4001   | 1.8092  | 1.5040  | 0.8234 | 0.1960 | 0.3157 |
| Isoform 2 of Gephyrin                                            | GPHN   | -0.3872  | -4.6078 | -4.2609 | 0.8274 | 0.0020 | 0.0048 |
| Glucose-6-phosphate isomerase                                    | GPI    | 1.5188   | -1.6167 | -2.6225 | 0.3049 | 0.2497 | 0.0655 |
| Isoform 2 of Transmembrane glycoprotein NMB                      | GPNMB  | 1.2561   | 1.9048  | 1.0146  | 0.4058 | 0.1711 | 0.5173 |
| Glutathione peroxidase 1                                         | GPX1   | -4.6776  | 2.5783  | 5.7191  | 0.0017 | 0.0609 | 0.0004 |
| Glutathione peroxidase 3                                         | GPX3   | -2.6276  | -3.1507 | -1.3035 | 0.0627 | 0.0230 | 0.3922 |
| Growth factor receptor-bound protein 2                           | GRB2   | -4.9071  | 0.1407  | 3.4818  | 0.0011 | 0.9270 | 0.0176 |
| Glyoxylate reductase/hydroxypyruvate reductase                   | GRHPR  | 1.8516   | -3.1730 | -4.3774 | 0.1988 | 0.0222 | 0.0040 |
| Glycogen synthase kinase-3 beta                                  | GSK3B  | -1.2652  | 0.2513  | 1.1089  | 0.4036 | 0.8771 | 0.4765 |
| Isoform 2 of Gelsolin                                            | GSN    | -0.6655  | -3.6400 | -3.1210 | 0.7032 | 0.0104 | 0.0301 |
| Glutathione reductase, mitochondrial                             | GSR    | -7.4162  | -7.7204 | -2.5280 | 0.0000 | 0.0000 | 0.0748 |
| Glutathione synthetase                                           | GSS    | -1.1737  | -1.5506 | -0.7229 | 0.4456 | 0.2709 | 0.6591 |
| Isoform 4 of Glutathione S-transferase kappa 1                   | GSTK1  | -13.7316 | -1.5762 | 7.8087  | 0.0000 | 0.2624 | 0.0000 |
| Glutathione S-transferase Mu 3                                   | GSTM3  | -3.1266  | -0.7388 | 1.4049  | 0.0274 | 0.6456 | 0.3533 |
| Glutathione S-transferase omega-1                                | GSTO1  | -0.5244  | 5.1046  | 5.3699  | 0.7697 | 0.0009 | 0.0008 |
| Glutathione S-transferase P                                      | GSTP1  | 1.2599   | -2.2847 | -3.1019 | 0.4057 | 0.0970 | 0.0310 |
| Glutathione S-transferase theta-1                                | GSTT1  | -4.6489  | -3.5008 | -0.2700 | 0.0018 | 0.0129 | 0.8827 |
| Isoform 2 of General transcription factor II-I                   | GTF2I  | 0.6097   | -0.3648 | -0.7736 | 0.7343 | 0.8268 | 0.6387 |
| Isoform 2 of Histone H1.0                                        | H1-0   | -0.0678  | 1.0108  | 1.0388  | 0.9677 | 0.5042 | 0.5073 |
| Cluster of Histone H1.4                                          | H1-4   | 0.3935   | -1.6701 | -1.9081 | 0.8252 | 0.2330 | 0.1921 |
| Histone H1.5                                                     | H1-5   | 1.8785   | 1.5957  | 0.2870  | 0.1915 | 0.2566 | 0.8797 |
| Histone H1x                                                      | H1FX   | -0.1955  | -1.8187 | -1.6527 | 0.9192 | 0.1938 | 0.2649 |
| Histone H2A.V                                                    | H2AFV  | 0.5679   | -0.1658 | -0.5498 | 0.7490 | 0.9144 | 0.7487 |
| Isoform 1 of Core histone macro-H2A.1                            | H2AFY  | 0.5174   | -1.0709 | -1.4042 | 0.7734 | 0.4739 | 0.3533 |
| Core histone macro-H2A.2                                         | H2AFY2 | 1.3102   | -0.9376 | -1.8135 | 0.3844 | 0.5409 | 0.2188 |
| Cluster of Histone H2B type 1-M                                  | H2BC14 | 13.0643  | 8.5443  | -0.5114 | 0.0000 | 0.0000 | 0.7702 |
| Cluster of Histone H3.3                                          | H3-3A  | 1.4850   | 1.2625  | 0.2279  | 0.3177 | 0.3862 | 0.8970 |
| Histone H4                                                       | H4C1   | 2.0623   | 0.0709  | -1.3356 | 0.1478 | 0.9602 | 0.3798 |
| Cluster of 3-hydroxyanthranilate 3,4-dioxygenase                 | HAAO   | 2.7650   | 0.4275  | -1.4643 | 0.0502 | 0.7991 | 0.3299 |
| Isoform 2 of Hydroxyacyl-coenzyme A dehydrogenase, mitochondrial | HADH   | -6.0081  | -4.1532 | 0.0154  | 0.0002 | 0.0044 | 0.9917 |
| Trifunctional enzyme subunit alpha, mitochondrial                | HADHA  | 0.6951   | 1.6227  | 1.1198  | 0.6882 | 0.2489 | 0.4728 |
| Trifunctional enzyme subunit beta, mitochondrial                 | HADHB  | 0.2511   | 1.8229  | 1.6190  | 0.8898 | 0.1938 | 0.2771 |

|                                                                               |           |          |         |         |        |        |        |
|-------------------------------------------------------------------------------|-----------|----------|---------|---------|--------|--------|--------|
| Isoform 2 of Hydroxyacylglutathione hydrolase, mitochondrial                  | HAGH      | -0.8017  | -4.7270 | -4.0955 | 0.6345 | 0.0017 | 0.0063 |
| Isoform 2 of Histidine--tRNA ligase, cytoplasmic                              | HARS      | -2.8511  | -0.6953 | 1.2599  | 0.0437 | 0.6632 | 0.4117 |
| Hemoglobin subunit alpha                                                      | HBA1      | -1.7807  | -4.3879 | -3.0955 | 0.2182 | 0.0029 | 0.0312 |
| Hemoglobin subunit beta                                                       | HBB       | -1.4477  | -3.9615 | -2.9037 | 0.3299 | 0.0061 | 0.0421 |
| Hemoglobin subunit delta                                                      | HBD       | -1.7165  | -3.7180 | -2.4813 | 0.2386 | 0.0091 | 0.0804 |
| Hemoglobin subunit gamma-1                                                    | HBG1      | -14.1692 | -6.9054 | 2.8737  | 0.0000 | 0.0001 | 0.0438 |
| Isoform 6 of Histone deacetylase 7                                            | HDAC7     | 0.1170   | 0.5243  | 0.4351  | 0.9493 | 0.7508 | 0.8032 |
| Isoform 2 of Hepatoma-derived growth factor-related protein 2                 | HDGFL2    | 1.5630   | 0.3511  | -0.7203 | 0.2896 | 0.8337 | 0.6600 |
| Vigilin                                                                       | HDLBP     | 2.3447   | 1.2587  | -0.3616 | 0.0969 | 0.3872 | 0.8395 |
| Heme-binding protein 1                                                        | HEBP1     | -0.5641  | -8.1750 | -7.6434 | 0.7504 | 0.0000 | 0.0000 |
| Heme-binding protein 2                                                        | HEBP2     | -13.9018 | -0.7069 | 8.7783  | 0.0000 | 0.6575 | 0.0000 |
| 3-hydroxyisobutyrate dehydrogenase, mitochondrial                             | HIBADH    | -8.5979  | -0.2749 | 5.5886  | 0.0000 | 0.8656 | 0.0005 |
| Histidine triad nucleotide-binding protein 2, mitochondrial                   | HINT2     | -0.1653  | -8.5169 | -8.2508 | 0.9318 | 0.0000 | 0.0000 |
| Cluster of Histone H2A type 1-A                                               | HIST1H2AA | 0.2954   | -0.7084 | -0.8969 | 0.8710 | 0.6575 | 0.5766 |
| Putative histone H2B type 2-C                                                 | HIST2H2BC | 0.4503   | 8.2682  | 7.8124  | 0.8013 | 0.0000 | 0.0000 |
| Isoform 2 of Hexokinase-1                                                     | HK1       | -0.8296  | 1.2679  | 1.8103  | 0.6204 | 0.3841 | 0.2196 |
| Cluster of Isoform 2 of HLA class I histocompatibility antigen, A alpha chain | HLA-A     | -1.8028  | -2.7597 | -1.4816 | 0.2130 | 0.0457 | 0.3243 |
| HLA class I histocompatibility antigen, B alpha chain                         | HLA-B     | -2.4029  | -1.3937 | 0.2688  | 0.0887 | 0.3296 | 0.8827 |
| Cluster of HLA class II histocompatibility antigen, DR alpha chain            | HLA-DRA   | -3.5094  | -4.0651 | -1.6005 | 0.0138 | 0.0051 | 0.2820 |
| Cluster of HLA class II histocompatibility antigen, DRB1-8 beta chain         | HLA-DRB1  | -1.4152  | 16.9294 | 17.5886 | 0.3419 | 0.0000 | 0.0000 |
| Cluster of HLA class II histocompatibility antigen, DRB1-13 beta chain        | HLA-DRB1  | -12.8701 | -0.8099 | 7.9742  | 0.0000 | 0.6058 | 0.0000 |
| HLA class II histocompatibility antigen, DRB1-4 beta chain                    | HLA-DRB1  | -9.9538  | -7.7131 | -0.7917 | 0.0000 | 0.0000 | 0.6305 |
| Cluster of HLA class II histocompatibility antigen, DRB1-7 beta chain         | HLA-DRB1  | -2.4724  | 7.5200  | 9.0692  | 0.0793 | 0.0000 | 0.0000 |
| HLA class I histocompatibility antigen, alpha chain E                         | HLA-E     | 17.7177  | 11.1080 | -1.1647 | 0.0000 | 0.0000 | 0.4526 |
| Cluster of High mobility group protein B1                                     | HMGB1     | 1.1853   | -0.3495 | -1.1509 | 0.4400 | 0.8337 | 0.4582 |
| High mobility group protein B2                                                | HMGB2     | 15.5830  | 10.1090 | -0.6912 | 0.0000 | 0.0000 | 0.6726 |
| Isoform 2 of Hydroxymethylglutaryl-CoA synthase, mitochondrial                | HMGCS2    | -8.0596  | -0.2358 | 5.2601  | 0.0000 | 0.8850 | 0.0009 |
| Histamine N-methyltransferase                                                 | HNMT      | 3.0002   | 1.4893  | -0.5818 | 0.0339 | 0.2953 | 0.7311 |

|                                                                         |           |         |          |         |        |        |        |
|-------------------------------------------------------------------------|-----------|---------|----------|---------|--------|--------|--------|
| Heterogeneous nuclear ribonucleoprotein A0                              | HNRNPA0   | -0.6998 | 4.9394   | 5.3273  | 0.6868 | 0.0012 | 0.0008 |
| Isoform A1-A of Heterogeneous nuclear ribonucleoprotein A1              | HNRNPA1   | 0.6855  | 0.3393   | -0.1339 | 0.6935 | 0.8384 | 0.9325 |
| Heterogeneous nuclear ribonucleoproteins A2/B1                          | HNRNPA2B1 | 1.8869  | 0.0452   | -1.2413 | 0.1904 | 0.9743 | 0.4209 |
| Isoform 2 of Heterogeneous nuclear ribonucleoprotein A3                 | HNRNPA3   | -0.7923 | 1.1815   | 1.7001  | 0.6395 | 0.4208 | 0.2511 |
| Isoform 2 of Heterogeneous nuclear ribonucleoprotein A/B                | HNRNPAB   | -4.0431 | -0.7359  | 2.0323  | 0.0053 | 0.6467 | 0.1598 |
| Cluster of Isoform C1 of Heterogeneous nuclear ribonucleoproteins C1/C2 | HNRNPC    | 0.9766  | 0.3260   | -0.3454 | 0.5426 | 0.8443 | 0.8452 |
| Isoform 2 of Heterogeneous nuclear ribonucleoprotein D0                 | HNRNPD    | 1.7777  | -0.2155  | -1.4229 | 0.2184 | 0.8935 | 0.3471 |
| Heterogeneous nuclear ribonucleoprotein D-like                          | HNRNPDL   | -4.5771 | -3.4907  | -0.3091 | 0.0020 | 0.0131 | 0.8681 |
| Heterogeneous nuclear ribonucleoprotein F                               | HNRNPF    | 1.1213  | 1.0651   | 0.2819  | 0.4705 | 0.4755 | 0.8827 |
| Cluster of Heterogeneous nuclear ribonucleoprotein H                    | HNRNPH1   | 2.2222  | 0.3197   | -1.2003 | 0.1168 | 0.8457 | 0.4377 |
| Isoform 2 of Heterogeneous nuclear ribonucleoprotein H3                 | HNRNPH3   | 0.7120  | -0.3626  | -0.8413 | 0.6821 | 0.8277 | 0.6084 |
| Isoform 2 of Heterogeneous nuclear ribonucleoprotein K                  | HNRNPK    | 1.7355  | -1.2233  | -2.3838 | 0.2323 | 0.4015 | 0.0931 |
| Heterogeneous nuclear ribonucleoprotein L                               | HNRNPL    | 1.5699  | 0.6044   | -0.4761 | 0.2882 | 0.7088 | 0.7812 |
| Isoform 2 of Heterogeneous nuclear ribonucleoprotein M                  | HNRNPM    | 2.0173  | 0.3525   | -1.0284 | 0.1584 | 0.8334 | 0.5114 |
| Cluster of Isoform 2 of Heterogeneous nuclear ribonucleoprotein R       | HNRNPR    | 1.5264  | 8.4997   | 7.3065  | 0.3024 | 0.0000 | 0.0000 |
| Heterogeneous nuclear ribonucleoprotein U                               | HNRNPU    | 1.7978  | -0.5919  | -1.8063 | 0.2140 | 0.7134 | 0.2208 |
| Isoform 2 of Heterogeneous nuclear ribonucleoprotein U-like protein 1   | HNRNPUL1  | -0.4130 | -0.8975  | -0.5999 | 0.8201 | 0.5584 | 0.7238 |
| Heterogeneous nuclear ribonucleoprotein U-like protein 2                | HNRNPUL2  | 1.1606  | -2.4302  | -3.1772 | 0.4516 | 0.0776 | 0.0277 |
| Cluster of Isoform 2 of Haptoglobin                                     | HP        | 1.0176  | -0.0912  | -0.7830 | 0.5246 | 0.9509 | 0.6349 |
| Heterochromatin protein 1-binding protein 3                             | HP1BP3    | 0.5856  | 0.3657   | -0.0399 | 0.7408 | 0.8268 | 0.9789 |
| Cluster of Isoform 5 of 15-hydroxyprostaglandin dehydrogenase [NAD(+)]  | HPGD      | -0.3190 | -10.6764 | 10.2666 | 0.8624 | 0.0000 | 0.0000 |
| Hemopexin                                                               | HPX       | 1.7093  | -1.0366  | -2.1826 | 0.2401 | 0.4901 | 0.1283 |
| Histidine-rich glycoprotein                                             | HRG       | -0.4820 | -1.1464  | -0.7973 | 0.7863 | 0.4383 | 0.6296 |
| Hornerin                                                                | HRNR      | -1.3744 | -1.4767  | -0.5137 | 0.3575 | 0.3003 | 0.7702 |
| HCLS1-binding protein 3                                                 | HS1BP3    | 1.8170  | -0.1871  | -1.4218 | 0.2090 | 0.9044 | 0.3471 |
| 3-hydroxyacyl-CoA dehydrogenase type-2                                  | HSD17B10  | 0.9511  | -0.2912  | -0.9340 | 0.5558 | 0.8588 | 0.5548 |

|                                                                                     |          |         |         |         |        |        |        |
|-------------------------------------------------------------------------------------|----------|---------|---------|---------|--------|--------|--------|
| Very-long-chain 3-oxoacyl-CoA reductase                                             | HSD17B12 | 5.1993  | -0.9706 | -4.4959 | 0.0007 | 0.5241 | 0.0033 |
| Peroxisomal multifunctional enzyme type 2                                           | HSD17B4  | -0.0882 | -0.6628 | -0.5908 | 0.9625 | 0.6814 | 0.7284 |
| Cluster of Isoform 2 of Heat shock protein HSP 90-alpha                             | HSP90AA1 | 1.4626  | -0.6414 | -1.6265 | 0.3256 | 0.6919 | 0.2744 |
| Endoplasmic reticulum chaperone BiP                                                 | HSP90B1  | 2.1793  | -0.4281 | -1.9053 | 0.1236 | 0.7991 | 0.1924 |
| Heat shock 70 kDa protein 12A                                                       | HSPA12A  | -1.5644 | -1.4744 | -0.3819 | 0.2896 | 0.3011 | 0.8299 |
| Heat shock 70 kDa protein 12B                                                       | HSPA12B  | -2.1899 | -2.2948 | -0.7613 | 0.1216 | 0.0958 | 0.6422 |
| Cluster of Heat shock 70 kDa protein 1B                                             | HSPA1B   | -0.8413 | -1.7156 | -1.1114 | 0.6135 | 0.2194 | 0.4758 |
| Heat shock 70 kDa protein 4                                                         | HSPA4    | 0.9119  | 0.4688  | -0.1611 | 0.5723 | 0.7808 | 0.9236 |
| Endoplasmic reticulum chaperone BiP                                                 | HSPA5    | 0.9426  | -1.2392 | -1.8591 | 0.5588 | 0.3957 | 0.2058 |
| Cluster of Heat shock cognate 71 kDa protein                                        | HSPA8    | 0.3683  | -0.3932 | -0.6371 | 0.8387 | 0.8169 | 0.7047 |
| Stress-70 protein, mitochondrial                                                    | HSPA9    | 0.1304  | 1.0070  | 0.8999  | 0.9459 | 0.5054 | 0.5748 |
| Heat shock protein beta-1                                                           | HSPB1    | 0.3591  | 0.4162  | 0.1641  | 0.8444 | 0.8015 | 0.9236 |
| 60 kDa heat shock protein, mitochondrial                                            | HSPD1    | 0.5520  | -1.6975 | -2.0430 | 0.7578 | 0.2248 | 0.1578 |
| 10 kDa heat shock protein, mitochondrial                                            | HSPE1    | 0.9749  | -1.5613 | -2.1974 | 0.5432 | 0.2672 | 0.1258 |
| Basement membrane-specific heparan sulfate proteoglycan core protein                | HSPG2    | 0.6977  | 0.0513  | -0.4250 | 0.6868 | 0.9715 | 0.8077 |
| Serine protease HTRA1                                                               | HTRA1    | -5.9204 | -0.9225 | 3.1283  | 0.0002 | 0.5484 | 0.0299 |
| Isoform 2 of E3 ubiquitin-protein ligase HUWE1                                      | HUWE1    | 0.1150  | -0.4301 | -0.5007 | 0.9493 | 0.7991 | 0.7734 |
| Hypoxia up-regulated protein 1                                                      | HYOU1    | -0.3901 | -2.5547 | -2.2428 | 0.8264 | 0.0632 | 0.1172 |
| Isoamyl acetate-hydrolyzing esterase 1 homolog                                      | IAH1     | -7.2894 | -1.4610 | 3.5322  | 0.0000 | 0.3066 | 0.0162 |
| Isoleucine--tRNA ligase, mitochondrial                                              | IARS2    | -0.5657 | 0.1769  | 0.5592  | 0.7502 | 0.9107 | 0.7447 |
| Intercellular adhesion molecule 1                                                   | ICAM1    | -0.6541 | -1.4514 | -0.9796 | 0.7090 | 0.3098 | 0.5308 |
| Isocitrate dehydrogenase [NADP] cytoplasmic                                         | IDH1     | 3.7773  | 1.0052  | -1.5868 | 0.0087 | 0.5059 | 0.2869 |
| Isocitrate dehydrogenase [NADP], mitochondrial                                      | IDH2     | 2.8415  | 4.1946  | 2.1828  | 0.0444 | 0.0041 | 0.1283 |
| Interferon-induced protein 44-like                                                  | IFI44L   | 8.9438  | 5.7018  | -0.4952 | 0.0000 | 0.0003 | 0.7747 |
| Isoform 2 of Interferon-induced protein with tetratricopeptide repeats 1            | IFIT1    | 6.6155  | 3.8177  | -0.7588 | 0.0001 | 0.0078 | 0.6422 |
| Isoform 2 of Insulin-like growth factor-binding protein complex acid labile subunit | IGFALS   | 1.6891  | -0.0902 | -1.2395 | 0.2471 | 0.9509 | 0.4209 |
| Isoform 2 of Insulin-like growth factor-binding protein 7                           | IGFBP7   | 8.6395  | 5.7731  | -0.2178 | 0.0000 | 0.0003 | 0.9013 |
| Cluster of Immunoglobulin heavy constant alpha 1                                    | IGHA1    | -0.4365 | -1.0109 | -0.6953 | 0.8090 | 0.5042 | 0.6718 |
| Isoform 2 of Immunoglobulin heavy constant delta                                    | IGHD     | 12.8926 | 1.3127  | -7.4957 | 0.0000 | 0.3676 | 0.0000 |

|                                                        |          |          |          |         |        |        |        |
|--------------------------------------------------------|----------|----------|----------|---------|--------|--------|--------|
| Immunoglobulin heavy constant gamma 1                  | IGHG1    | 0.2686   | -1.0124  | -1.1772 | 0.8812 | 0.5041 | 0.4488 |
| Immunoglobulin heavy constant gamma 2                  | IGHG2    | 1.6525   | -0.1537  | -1.2770 | 0.2600 | 0.9199 | 0.4039 |
| Immunoglobulin heavy constant gamma 3                  | IGHG3    | 0.2925   | -0.6783  | -0.8654 | 0.8710 | 0.6724 | 0.5978 |
| Immunoglobulin heavy constant gamma 4                  | IGHG4    | 4.4820   | -0.4248  | -3.4711 | 0.0024 | 0.7997 | 0.0178 |
| Immunoglobulin heavy constant mu                       | IGHM     | 2.9442   | 0.0915   | -1.9163 | 0.0372 | 0.9509 | 0.1900 |
| Cluster of Immunoglobulin heavy variable 1-18          | IGHV1-18 | -0.6649  | -12.8953 | 12.2099 | 0.7032 | 0.0000 | 0.0000 |
| Immunoglobulin heavy variable 3-66                     | IGHV3-66 | 1.9654   | -0.3197  | -1.6531 | 0.1712 | 0.8457 | 0.2649 |
| Immunoglobulin heavy variable 3-72                     | IGHV3-72 | -14.1732 | -1.4329  | 8.2504  | 0.0000 | 0.3149 | 0.0000 |
| Immunoglobulin heavy variable 3-9                      | IGHV3-9  | -9.6273  | -6.5859  | 0.0927  | 0.0000 | 0.0001 | 0.9574 |
| Immunoglobulin kappa constant                          | IGKC     | 0.8204   | -1.0863  | -1.6257 | 0.6243 | 0.4684 | 0.2744 |
| Cluster of Immunoglobulin kappa variable 2-28          | IGKV2-28 | 5.3546   | -2.1755  | -5.7849 | 0.0005 | 0.1147 | 0.0004 |
| Immunoglobulin kappa variable 3-11                     | IGKV3-11 | 2.4635   | 1.3363   | -0.3664 | 0.0802 | 0.3564 | 0.8382 |
| Immunoglobulin kappa variable 3-15                     | IGKV3-15 | 9.2811   | -3.3036  | -9.5681 | 0.0000 | 0.0178 | 0.0000 |
| Cluster of Immunoglobulin kappa variable 3-20          | IGKV3-20 | 1.1274   | -0.0240  | -0.7917 | 0.4693 | 0.9861 | 0.6305 |
| Cluster of Immunoglobulin lambda-like polypeptide 5    | IGLL5    | -0.1082  | -1.2192  | -1.1235 | 0.9526 | 0.4035 | 0.4717 |
| Immunoglobulin lambda variable 1-47                    | IGLV1-47 | 0.0144   | 4.7237   | 4.6288  | 0.9943 | 0.0017 | 0.0026 |
| Immunoglobulin superfamily member 8                    | IGSF8    | -12.4505 | -1.2613  | 7.2451  | 0.0000 | 0.3862 | 0.0000 |
| Interleukin enhancer-binding factor 2                  | ILF2     | 1.3024   | -1.8736  | -2.7272 | 0.3887 | 0.1800 | 0.0563 |
| Isoform 7 of Interleukin enhancer-binding factor 3     | ILF3     | 5.2008   | -0.7165  | -4.2473 | 0.0007 | 0.6542 | 0.0049 |
| Cluster of Isoform 2 of Integrin-linked protein kinase | ILK      | 1.2781   | -0.6030  | -1.4630 | 0.3988 | 0.7088 | 0.3301 |
| Isoform 4 of MIC complex subunit MIC60                 | IMMT     | 0.9859   | 0.0429   | -0.6296 | 0.5387 | 0.9754 | 0.7082 |
| Inverted formin-2                                      | INF2     | -1.5903  | -0.5677  | 0.5262  | 0.2805 | 0.7246 | 0.7627 |
| Inhibin beta E chain                                   | INHBE    | -16.4546 | 0.1491   | 11.3583 | 0.0000 | 0.9223 | 0.0000 |
| Isoform 2 of Importin-5                                | IPO5     | 2.5658   | 1.2740   | -0.4973 | 0.0685 | 0.3819 | 0.7743 |
| Importin-9                                             | IPO9     | -0.7507  | -1.5564  | -1.0168 | 0.6626 | 0.2687 | 0.5163 |
| Ras GTPase-activating-like protein IQGAP1              | IQGAP1   | 2.5915   | 1.0914   | -0.6941 | 0.0665 | 0.4660 | 0.6718 |
| Ras GTPase-activating-like protein IQGAP2              | IQGAP2   | -2.1944  | -3.4163  | -1.8595 | 0.1211 | 0.0147 | 0.2058 |
| Ubiquitin-like protein ISG15                           | ISG15    | 16.7299  | 10.4144  | -1.1728 | 0.0000 | 0.0000 | 0.4501 |
| Isochorismatase domain-containing protein 2            | ISOC2    | -5.0430  | -3.5594  | -0.0591 | 0.0009 | 0.0118 | 0.9696 |
| Isoform 2 of IST1 homolog                              | IST1     | 4.0803   | 2.8564   | 0.0247  | 0.0050 | 0.0389 | 0.9870 |



|                                                                                          |         |         |         |         |        |        |        |
|------------------------------------------------------------------------------------------|---------|---------|---------|---------|--------|--------|--------|
| Inositol-3-phosphate synthase 1                                                          | ISYNA1  | 2.3462  | 2.1163  | 0.4795  | 0.0968 | 0.1236 | 0.7812 |
| E3 ubiquitin-protein ligase Itchy homolog                                                | ITCH    | -0.3530 | -0.8992 | -0.6425 | 0.8482 | 0.5581 | 0.7021 |
| Integrin alpha-1                                                                         | ITGA1   | 1.1813  | -0.8654 | -1.6547 | 0.4410 | 0.5784 | 0.2648 |
| Cluster of Integrin alpha-3                                                              | ITGA3   | -0.7663 | -3.7357 | -3.1463 | 0.6530 | 0.0089 | 0.0289 |
| Isoform Alpha-6X1B of Integrin alpha-6                                                   | ITGA6   | 2.7563  | 1.1219  | -0.7765 | 0.0508 | 0.4493 | 0.6381 |
| Integrin alpha-8                                                                         | ITGA8   | -0.1795 | 0.7404  | 0.8494  | 0.9267 | 0.6452 | 0.6051 |
| Isoform 3 of Integrin alpha-V                                                            | ITGAV   | -0.9487 | -1.7560 | -1.0779 | 0.5564 | 0.2090 | 0.4902 |
| Integrin beta-1                                                                          | ITGB1   | -1.7396 | -4.9173 | -3.6434 | 0.2309 | 0.0012 | 0.0137 |
| Cluster of Integrin beta-3                                                               | ITGB3   | 0.4522  | 0.6826  | 0.3622  | 0.8004 | 0.6709 | 0.8395 |
| Integrin beta-5                                                                          | ITGB5   | 1.2311  | -2.0892 | -2.8904 | 0.4192 | 0.1282 | 0.0427 |
| Inter-alpha-trypsin inhibitor heavy chain H1                                             | ITIH1   | 2.7568  | 1.1851  | -0.7147 | 0.0508 | 0.4198 | 0.6617 |
| Inter-alpha-trypsin inhibitor heavy chain H2                                             | ITIH2   | 0.1183  | 1.6177  | 1.5079  | 0.9493 | 0.2497 | 0.3152 |
| Cluster of Isoform 2 of Inter-alpha-trypsin inhibitor heavy chain H4                     | ITIH4   | -3.5376 | -0.9878 | 1.4405  | 0.0132 | 0.5144 | 0.3391 |
| Cluster of Inter-alpha-trypsin inhibitor heavy chain H5                                  | ITIH5   | 1.0178  | -1.9466 | -2.6051 | 0.5246 | 0.1611 | 0.0677 |
| Integral membrane protein 2B                                                             | ITM2B   | -2.5461 | -4.1552 | -2.3455 | 0.0704 | 0.0044 | 0.0990 |
| Isoform 2 of Inosine triphosphate pyrophosphatase                                        | ITPA    | 7.5581  | 4.2055  | -1.0203 | 0.0000 | 0.0040 | 0.5155 |
| Junctional protein associated with coronary artery disease                               | JCAD    | 0.9106  | -1.1880 | -1.7871 | 0.5727 | 0.4196 | 0.2254 |
| Junction plakoglobin                                                                     | JUP     | 0.5296  | 1.3386  | 0.9536  | 0.7673 | 0.3555 | 0.5431 |
| Cluster of KN motif and ankyrin repeat domain-containing protein 2                       | KANK2   | -2.2695 | -2.6207 | -1.0270 | 0.1082 | 0.0570 | 0.5118 |
| Isoform 2 of KN motif and ankyrin repeat domain-containing protein 3                     | KANK3   | 0.2588  | -2.0722 | -2.2112 | 0.8859 | 0.1311 | 0.1235 |
| Lysine--tRNA ligase                                                                      | KARS1   | -0.6117 | -0.0151 | 0.4020  | 0.7337 | 0.9903 | 0.8208 |
| Kelch repeat and BTB domain-containing protein 11                                        | KBTBD11 | -4.5833 | -1.1881 | 1.9563  | 0.0020 | 0.4196 | 0.1798 |
| BTB/POZ domain-containing protein KCTD12                                                 | KCTD12  | -1.9061 | -2.1967 | -0.8583 | 0.1861 | 0.1116 | 0.6017 |
| Isoform 2 of KH domain-containing, RNA-binding, signal transduction-associated protein 1 | KHDRBS1 | -0.4787 | -3.4827 | -3.0938 | 0.7866 | 0.0131 | 0.0312 |
| Isoform A of Ketohexokinase                                                              | KHK     | -3.4401 | -1.4490 | 0.9211  | 0.0157 | 0.3103 | 0.5616 |
| Far upstream element-binding protein 2                                                   | KHSRP   | 2.0416  | -0.4919 | -1.8742 | 0.1525 | 0.7693 | 0.2018 |
| Kinesin-1 heavy chain                                                                    | KIF5B   | -0.0967 | -1.4817 | -1.3891 | 0.9585 | 0.2987 | 0.3588 |
| Isoform 2 of Kin of IRRE-like protein 1                                                  | KIRREL1 | -1.0525 | -6.7719 | -5.9327 | 0.5079 | 0.0001 | 0.0003 |
| Kininogen-1                                                                              | KNG1    | 3.5564  | 2.3959  | -0.0705 | 0.0129 | 0.0816 | 0.9647 |
| Importin subunit beta-1                                                                  | KPNB1   | 1.9843  | 0.4470  | -0.9132 | 0.1659 | 0.7925 | 0.5671 |
| Keratinocyte proline-rich protein                                                        | KPRP    | -1.8426 | -0.5852 | 0.6809  | 0.2017 | 0.7177 | 0.6769 |
| Keratin, type II cytoskeletal 1                                                          | KRT1    | -0.2491 | 0.3880  | 0.5508  | 0.8898 | 0.8185 | 0.7486 |

|                                                                |           |         |         |         |        |        |        |
|----------------------------------------------------------------|-----------|---------|---------|---------|--------|--------|--------|
| Keratin, type I cytoskeletal 10                                | KRT10     | -0.7216 | 0.0323  | 0.5234  | 0.6767 | 0.9822 | 0.7637 |
| Cluster of Keratin, type I cytoskeletal 14                     | KRT14     | 0.1070  | 0.7107  | 0.6249  | 0.9529 | 0.6575 | 0.7108 |
| Keratin, type I cytoskeletal 18                                | KRT18     | -0.4941 | 3.6309  | 3.9021  | 0.7785 | 0.0105 | 0.0086 |
| Cluster of Keratin, type II cytoskeletal 2 epidermal           | KRT2      | -0.8705 | -0.0892 | 0.5056  | 0.5979 | 0.9509 | 0.7716 |
| Keratin, type I cytoskeletal 27                                | KRT27     | 0.7880  | 4.9941  | 4.3672  | 0.6411 | 0.0011 | 0.0040 |
| Cluster of Keratin, type I cuticular Ha1                       | KRT31     | 14.5973 | 12.0663 | 1.9025  | 0.0000 | 0.0000 | 0.1931 |
| Keratin, type I cuticular Ha4                                  | KRT34     | 15.7543 | 19.7234 | 8.6332  | 0.0000 | 0.0000 | 0.0000 |
| Keratin, type I cuticular Ha6                                  | KRT36     | 23.3934 | 14.5084 | -1.6929 | 0.0000 | 0.0000 | 0.2532 |
| Keratin, type II cytoskeletal 4                                | KRT4      | 0.3050  | 1.5382  | 1.3026  | 0.8694 | 0.2755 | 0.3922 |
| Cluster of Keratin, type II cytoskeletal 71                    | KRT71     | 1.1240  | 4.0614  | 3.2223  | 0.4705 | 0.0051 | 0.0258 |
| Keratin, type II cytoskeletal 1b                               | KRT77     | -1.1207 | 15.5805 | 16.0633 | 0.4705 | 0.0000 | 0.0000 |
| Keratin, type II cytoskeletal 78                               | KRT78     | -0.1111 | -0.5625 | -0.4767 | 0.9517 | 0.7281 | 0.7812 |
| Cluster of Isoform 2 of Keratin, type II cytoskeletal 8        | KRT8      | -0.2275 | 9.7466  | 9.7260  | 0.9009 | 0.0000 | 0.0000 |
| Isoform 2 of Keratin, type II cytoskeletal 80                  | KRT80     | -6.3298 | -0.3828 | 3.9372  | 0.0001 | 0.8208 | 0.0081 |
| Cluster of Keratin, type II cuticular Hb5                      | KRT85     | 12.7272 | 9.8921  | 1.0417  | 0.0000 | 0.0000 | 0.5070 |
| Keratin, type I cytoskeletal 9                                 | KRT9      | 0.0029  | 0.5839  | 0.5713  | 0.9997 | 0.7182 | 0.7372 |
| Keratin-associated protein 13-1                                | KRTAP13-1 | 25.8063 | 16.4066 | -1.4730 | 0.0000 | 0.0000 | 0.3265 |
| Keratin-associated protein 13-2                                | KRTAP13-2 | 23.5866 | 16.5373 | 0.1678  | 0.0000 | 0.0000 | 0.9236 |
| Keratin-associated protein 13-4                                | KRTAP13-4 | 24.9529 | 17.0044 | -0.3046 | 0.0000 | 0.0000 | 0.8712 |
| Keratin-associated protein 3-3                                 | KRTAP3-3  | 30.8954 | 23.1512 | 1.6823  | 0.0000 | 0.0000 | 0.2552 |
| Isoform 2 of Kinectin                                          | KTN1      | 2.0289  | 0.6296  | -0.7642 | 0.1553 | 0.6991 | 0.6422 |
| Laminin subunit alpha-2                                        | LAMA2     | 0.2724  | 1.2101  | 1.0027  | 0.8794 | 0.4077 | 0.5203 |
| Cluster of Laminin subunit alpha-3                             | LAMA3     | 3.6474  | 2.5174  | -0.0133 | 0.0111 | 0.0669 | 0.9917 |
| Isoform 2 of Laminin subunit alpha-4                           | LAMA4     | -1.1593 | -1.2681 | -0.4553 | 0.4519 | 0.3841 | 0.7900 |
| Laminin subunit alpha-5                                        | LAMA5     | 1.4538  | -0.3257 | -1.3104 | 0.3284 | 0.8443 | 0.3889 |
| Laminin subunit beta-1                                         | LAMB1     | 3.4717  | 2.7359  | 0.3211  | 0.0148 | 0.0473 | 0.8602 |
| Laminin subunit beta-2                                         | LAMB2     | 2.0334  | 0.3035  | -1.0875 | 0.1545 | 0.8527 | 0.4869 |
| Laminin subunit gamma-1                                        | LAMC1     | 2.3973  | 0.2642  | -1.3740 | 0.0891 | 0.8703 | 0.3630 |
| Cluster of Lysosome-associated membrane glycoprotein 1         | LAMP1     | 1.3683  | -0.1656 | -1.0950 | 0.3601 | 0.9144 | 0.4839 |
| Isoform LAMP-2B of Lysosome-associated membrane glycoprotein 2 | LAMP2     | 4.7113  | 1.5824  | -1.6563 | 0.0016 | 0.2603 | 0.2645 |
| Ragulator complex protein LAMTOR1                              | LAMTOR1   | 6.4316  | 3.5947  | -0.8525 | 0.0001 | 0.0112 | 0.6033 |
| Glutathione S-transferase LANCL1                               | LANCL1    | 0.4529  | -7.4603 | -7.6344 | 0.8004 | 0.0000 | 0.0000 |
| Cytosol aminopeptidase                                         | LAP3      | 2.1271  | -1.1699 | -2.5982 | 0.1336 | 0.4266 | 0.0681 |
| Isoform 2 of Leucine--tRNA ligase, cytoplasmic                 | LARS      | -0.5142 | -1.0798 | -0.7099 | 0.7750 | 0.4710 | 0.6631 |
| LIM and SH3 domain protein 1                                   | LASP1     | -0.6169 | -1.8116 | -1.3586 | 0.7309 | 0.1958 | 0.3702 |

|                                                                    |          |          |          |         |        |        |        |
|--------------------------------------------------------------------|----------|----------|----------|---------|--------|--------|--------|
| Lipopolysaccharide-binding protein                                 | LBP      | -14.0589 | -2.2192  | 7.4003  | 0.0000 | 0.1077 | 0.0000 |
| Neutrophil gelatinase-associated lipocalin                         | LCN2     | 12.9695  | 7.2246   | -1.7428 | 0.0000 | 0.0000 | 0.2362 |
| Plastin-2                                                          | LCP1     | -0.4712  | -0.4760  | -0.1463 | 0.7910 | 0.7782 | 0.9298 |
| Cluster of Isoform 3 of L-lactate dehydrogenase A chain            | LDHA     | 0.1541   | -0.9874  | -1.0746 | 0.9378 | 0.5144 | 0.4914 |
| L-lactate dehydrogenase B chain                                    | LDHB     | 1.6289   | -2.9290  | -3.9862 | 0.2684 | 0.0339 | 0.0075 |
| Cluster of LEM domain-containing protein 2                         | LEMD2    | 1.7687   | 3.8672   | 2.5924  | 0.2212 | 0.0072 | 0.0687 |
| Galectin-1                                                         | LGALS1   | 0.4214   | 0.3325   | 0.0394  | 0.8143 | 0.8414 | 0.9789 |
| Galectin-3                                                         | LGALS3   | 6.7819   | 4.4861   | -0.2158 | 0.0000 | 0.0025 | 0.9016 |
| Galectin-3-binding protein                                         | LGALS3BP | 0.1701   | -2.4512  | -2.5229 | 0.9303 | 0.0749 | 0.0754 |
| Galectin-7                                                         | LGALS7   | 9.8737   | 5.8830   | -0.9508 | 0.0000 | 0.0003 | 0.5439 |
| Phospholysine phosphohistidine inorganic pyrophosphate phosphatase | LHPP     | 0.2992   | -9.4512  | -9.4848 | 0.8710 | 0.0000 | 0.0000 |
| Protein lin-7 homolog C                                            | LIN7C    | -19.5131 | -10.0691 | 3.4083  | 0.0000 | 0.0000 | 0.0194 |
| Protein ERGIC-53                                                   | LMAN1    | 6.3090   | 2.7213   | -1.6267 | 0.0001 | 0.0485 | 0.2744 |
| Cluster of Prelamin-A/C                                            | LMNA     | 1.9512   | 0.3704   | -0.9658 | 0.1736 | 0.8259 | 0.5363 |
| Lamin-B1                                                           | LMNB1    | 3.2880   | 5.9419   | 3.5945  | 0.0208 | 0.0002 | 0.0149 |
| Lamin-B2                                                           | LMNB2    | 2.6161   | 1.1413   | -0.6618 | 0.0638 | 0.4411 | 0.6894 |
| Cluster of Isoform 5 of LIM domain only protein 7                  | LMO7     | -0.0272  | -0.3820  | -0.3566 | 0.9851 | 0.8208 | 0.8423 |
| Apolipoprotein(a)                                                  | LPA      | -1.6157  | 3.9730   | 5.0024  | 0.2711 | 0.0060 | 0.0014 |
| Lipoma-preferred partner                                           | LPP      | -0.0899  | -2.0419  | -1.9438 | 0.9618 | 0.1380 | 0.1830 |
| Leucine-rich alpha-2-glycoprotein                                  | LRG1     | -0.6880  | 6.0730   | 6.4324  | 0.6922 | 0.0002 | 0.0001 |
| Pro-low-density lipoprotein receptor-related protein 1             | LRP1     | -1.0807  | -0.1177  | 0.6208  | 0.4935 | 0.9410 | 0.7123 |
| Low-density lipoprotein receptor-related protein 2                 | LRP2     | 0.6401   | -0.6815  | -1.1053 | 0.7156 | 0.6709 | 0.4784 |
| Leucine-rich PPR motif-containing protein, mitochondrial           | LRPPRC   | -1.4437  | -0.8033  | 0.1949  | 0.3307 | 0.6085 | 0.9094 |
| Isoform 2 of Leucine-rich repeat-containing protein 15             | LRRC15   | 20.6156  | 12.8949  | -1.3846 | 0.0000 | 0.0000 | 0.3604 |
| Leucine-rich repeat-containing protein 47                          | LRRC47   | 0.6662   | 5.6774   | 5.1211  | 0.7032 | 0.0004 | 0.0011 |
| Isoform 2 of Leucine-rich repeat flightless-interacting protein 1  | LRRFIP1  | -1.0509  | -0.2370  | 0.4833  | 0.5085 | 0.8846 | 0.7807 |
| U6 snRNA-associated Sm-like protein LSM8                           | LSM8     | 9.5714   | 6.0697   | -0.5615 | 0.0000 | 0.0002 | 0.7436 |
| Cluster of Leukotriene A-4 hydrolase                               | LTA4H    | 6.8081   | 3.7313   | -0.9748 | 0.0000 | 0.0090 | 0.5320 |
| Lactotransferrin                                                   | LTF      | 2.9840   | 1.0045   | -1.0469 | 0.0349 | 0.5059 | 0.5056 |
| Lumican                                                            | LUM      | 0.2552   | -0.4992  | -0.6641 | 0.8882 | 0.7672 | 0.6881 |
| Isoform 2 of Acyl-protein thioesterase 1                           | LYPLA1   | 3.2022   | 0.9358   | -1.2630 | 0.0240 | 0.5409 | 0.4106 |
| Lysozyme C                                                         | LYZ      | 1.2684   | -0.7326  | -1.5837 | 0.4030 | 0.6487 | 0.2875 |
| Microtubule-actin cross-linking factor 1, isoforms 1/2/3/5         | MACF1    | -2.8233  | -0.9111  | 1.0291  | 0.0455 | 0.5526 | 0.5114 |

|                                                                              |        |         |         |         |        |        |        |
|------------------------------------------------------------------------------|--------|---------|---------|---------|--------|--------|--------|
| Membrane-associated guanylate kinase, WW and PDZ domain-containing protein 2 | MAGI2  | -1.6893 | -5.9274 | -4.6696 | 0.2471 | 0.0003 | 0.0024 |
| Mesencephalic astrocyte-derived neurotrophic factor                          | MANF   | 12.8001 | 8.1338  | -0.7346 | 0.0000 | 0.0000 | 0.6551 |
| Cluster of Amine oxidase [flavin-containing] B                               | MAOB   | -0.5120 | 2.2696  | 2.5776  | 0.7755 | 0.0991 | 0.0698 |
| Isoform 2 of Microtubule-associated protein 1A                               | MAP1A  | -0.5321 | 1.2982  | 1.6374  | 0.7673 | 0.3714 | 0.2711 |
| Microtubule-associated protein 1B                                            | MAP1B  | -1.1349 | -0.1383 | 0.6375  | 0.4663 | 0.9283 | 0.7047 |
| Microtubule-associated protein 1S                                            | MAP1S  | -0.1424 | -4.1345 | -3.9629 | 0.9417 | 0.0045 | 0.0078 |
| Isoform 3 of Microtubule-associated protein 2                                | MAP2   | -0.3426 | 3.5373  | 3.7070  | 0.8507 | 0.0122 | 0.0122 |
| Cluster of Isoform 4 of Microtubule-associated protein 4                     | MAP4   | 1.5524  | -2.5544 | -3.5661 | 0.2939 | 0.0632 | 0.0155 |
| Microtubule-associated protein 6                                             | MAP6   | -4.1974 | 0.7073  | 3.5546  | 0.0041 | 0.6575 | 0.0157 |
| Microtubule-associated protein RP/EB family member 1                         | MAPRE1 | -0.1007 | -3.5075 | -3.3757 | 0.9559 | 0.0128 | 0.0201 |
| Cluster of Microtubule-associated protein tau                                | MAPT   | 0.2449  | -3.9441 | -4.0399 | 0.8913 | 0.0063 | 0.0069 |
| Mitochondrial amidoxime reducing component 2                                 | MARC2  | -5.8633 | 0.9130  | 4.8917  | 0.0002 | 0.5526 | 0.0017 |
| Microtubule-associated serine/threonine-protein kinase 4                     | MAST4  | -3.4999 | -0.3065 | 2.0838  | 0.0140 | 0.8524 | 0.1477 |
| Matrin-3                                                                     | MATR3  | -0.3945 | -1.8082 | -1.5068 | 0.8252 | 0.1960 | 0.3152 |
| Cluster of Cell surface glycoprotein MUC18                                   | MCAM   | -0.1379 | 2.3320  | 2.3839  | 0.9426 | 0.0903 | 0.0931 |
| Isoform 3 of Malate dehydrogenase, cytoplasmic                               | MDH1   | 0.2983  | -4.3578 | -4.4826 | 0.8710 | 0.0031 | 0.0034 |
| Malate dehydrogenase, mitochondrial                                          | MDH2   | 0.8148  | -0.8765 | -1.4158 | 0.6271 | 0.5706 | 0.3495 |
| Cluster of Isoform 3 of Methionine aminopeptidase 2                          | METAP2 | 0.6636  | 3.1499  | 2.6409  | 0.7032 | 0.0230 | 0.0635 |
| Lactadherin                                                                  | MFGE8  | 0.4277  | 5.1396  | 4.7556  | 0.8134 | 0.0008 | 0.0021 |
| Macrophage migration inhibitory factor                                       | MIF    | -0.9803 | -3.0249 | -2.3024 | 0.5403 | 0.0287 | 0.1056 |
| Neprilysin                                                                   | MME    | -4.1673 | -5.0311 | -2.1009 | 0.0043 | 0.0010 | 0.1442 |
| Matrix metalloproteinase-9                                                   | MMP9   | 1.7666  | 1.6347  | 0.4015  | 0.2216 | 0.2445 | 0.8208 |
| Multimerin-2                                                                 | MMRN2  | 0.3466  | -1.5398 | -1.7483 | 0.8495 | 0.2752 | 0.2354 |
| Mannosyl-oligosaccharide glucosidase                                         | MOGS   | -0.8675 | -2.2219 | -1.5908 | 0.5997 | 0.1074 | 0.2858 |
| Isoform H7 of Myeloperoxidase                                                | MPO    | 3.0059  | 0.5514  | -1.5068 | 0.0336 | 0.7348 | 0.3152 |
| Isoform 3 of 55 kDa erythrocyte membrane protein                             | MPP1   | 0.5409  | -0.2254 | -0.5899 | 0.7660 | 0.8894 | 0.7284 |
| MAGUK p55 subfamily member 5                                                 | MPP5   | -1.0424 | -5.7269 | -4.9134 | 0.5122 | 0.0003 | 0.0016 |
| Isoform 2 of Myosin phosphatase Rho-interacting protein                      | MPRIIP | 3.1908  | 1.4081  | -0.7914 | 0.0243 | 0.3242 | 0.6305 |
| Isoform 2 of 3-mercaptopyruvate sulfurtransferase                            | MPST   | -6.5251 | -0.5313 | 3.9243  | 0.0001 | 0.7482 | 0.0083 |
| C-type mannose receptor 2                                                    | MRC2   | 1.8085  | -0.4969 | -1.7202 | 0.2116 | 0.7678 | 0.2436 |

|                                                                            |        |         |         |         |        |        |        |
|----------------------------------------------------------------------------|--------|---------|---------|---------|--------|--------|--------|
| Mas-related G-protein coupled receptor member F                            | MRGPRF | -1.8975 | -0.7772 | 0.5297  | 0.1884 | 0.6256 | 0.7603 |
| DNA mismatch repair protein Msh2                                           | MSH2   | -1.1989 | 0.5866  | 1.3929  | 0.4349 | 0.7172 | 0.3581 |
| Isoform 2 of RNA-binding protein Musashi homolog 2                         | MSI2   | 11.2396 | 5.4063  | -2.3496 | 0.0000 | 0.0005 | 0.0984 |
| Moesin                                                                     | MSN    | -0.9677 | -3.0995 | -2.3843 | 0.5469 | 0.0251 | 0.0931 |
| Cytochrome c oxidase subunit 2                                             | MT-CO2 | -3.2387 | -0.3480 | 1.8651  | 0.0227 | 0.8338 | 0.2044 |
| Protein LYRIC                                                              | MTDH   | -0.7747 | 1.2805  | 1.7853  | 0.6487 | 0.3789 | 0.2255 |
| C-1-tetrahydrofolate synthase, cytoplasmic                                 | MTHFD1 | -0.1233 | -3.6316 | -3.4822 | 0.9483 | 0.0105 | 0.0176 |
| Myotubularin                                                               | MTM1   | -0.4369 | -0.4169 | -0.1117 | 0.8090 | 0.8015 | 0.9477 |
| Myotrophin                                                                 | MTPN   | 11.8925 | 6.9262  | -1.3020 | 0.0000 | 0.0001 | 0.3922 |
| Major vault protein                                                        | MVP    | 2.3051  | 1.5326  | -0.0657 | 0.1027 | 0.2778 | 0.9671 |
| Interferon-induced GTP-binding protein Mx2                                 | MX2    | 1.2766  | 3.8722  | 2.9325  | 0.3989 | 0.0071 | 0.0403 |
| Myeloid-associated differentiation marker                                  | MYADM  | 7.6443  | 5.4026  | 0.0966  | 0.0000 | 0.0006 | 0.9557 |
| Isoform 4 of Myosin-10                                                     | MYH10  | -0.5745 | -0.6211 | -0.2185 | 0.7463 | 0.7035 | 0.9013 |
| Isoform 2 of Myosin-11                                                     | MYH11  | 2.2956  | 15.6269 | 13.7811 | 0.1042 | 0.0000 | 0.0000 |
| Myosin-13                                                                  | MYH13  | -3.6642 | -2.1626 | 0.3731  | 0.0107 | 0.1168 | 0.8353 |
| Myosin-9                                                                   | MYH9   | -1.6839 | -3.2415 | -2.0357 | 0.2489 | 0.0198 | 0.1591 |
| Cluster of Myosin regulatory light chain 12B                               | MYL12B | -0.6741 | -0.9498 | -0.4734 | 0.7012 | 0.5348 | 0.7816 |
| Cluster of Myosin light polypeptide 6                                      | MYL6   | -0.6894 | -1.6171 | -1.1182 | 0.6916 | 0.2497 | 0.4734 |
| Isoform 2 of Myosin light chain kinase, smooth muscle                      | MYLK   | -2.5245 | -2.0356 | -0.2787 | 0.0727 | 0.1394 | 0.8827 |
| Isoform 2 of Unconventional myosin-Ib                                      | MYO1B  | 0.9441  | -1.1662 | -1.7884 | 0.5587 | 0.4280 | 0.2253 |
| Isoform 3 of Unconventional myosin-Ic                                      | MYO1C  | -1.3600 | -2.7517 | -1.7754 | 0.3639 | 0.0463 | 0.2281 |
| Unconventional myosin-I d                                                  | MYO1D  | -1.5224 | 0.1008  | 1.1363  | 0.3039 | 0.9502 | 0.4642 |
| Unconventional myosin-I e                                                  | MYO1E  | 1.1968  | -0.6872 | -1.4903 | 0.4357 | 0.6691 | 0.3225 |
| Unconventional myosin-I f                                                  | MYO1F  | -3.1993 | -0.2888 | 1.8963  | 0.0241 | 0.8588 | 0.1949 |
| Cluster of Isoform 6 of Myoferlin                                          | MYOF   | -0.7010 | 3.7241  | 4.1347  | 0.6868 | 0.0090 | 0.0059 |
| Nascent polypeptide-associated complex subunit alpha, muscle-specific form | NACA   | 1.8781  | 1.0544  | -0.2443 | 0.1915 | 0.4812 | 0.8897 |
| Isoform 2 of NEDD8-activating enzyme E1 regulatory subunit                 | NAE1   | -0.5060 | -1.8200 | -1.4425 | 0.7769 | 0.1938 | 0.3384 |
| Isoform 2 of N-acetyl-D-glucosamine kinase                                 | NAGK   | 0.9842  | -0.7569 | -1.4138 | 0.5387 | 0.6367 | 0.3501 |
| Sialic acid synthase                                                       | NANS   | -0.4014 | 0.2288  | 0.4982  | 0.8234 | 0.8880 | 0.7743 |
| Isoform 2 of Nucleosome assembly protein 1-like 1                          | NAP1L1 | -2.1303 | 8.2887  | 9.5910  | 0.1330 | 0.0000 | 0.0000 |
| Alpha-soluble NSF attachment protein                                       | NAPA   | 3.5920  | 1.9958  | -0.4877 | 0.0121 | 0.1491 | 0.7783 |
| Isoform 3 of Nicotinate phosphoribosyltransferase                          | NAPRT  | 3.9468  | 1.7763  | -0.9450 | 0.0063 | 0.2037 | 0.5471 |
| NAD(P)H-hydrate epimerase                                                  | NAXE   | -3.5402 | -0.6493 | 1.7746  | 0.0132 | 0.6886 | 0.2281 |

|                                                                                           |           |         |         |         |        |        |        |
|-------------------------------------------------------------------------------------------|-----------|---------|---------|---------|--------|--------|--------|
| Isoform 2 of Nck-associated protein 1                                                     | NCKAP1    | -0.3625 | -0.0894 | 0.1592  | 0.8423 | 0.9509 | 0.9243 |
| Nucleolin                                                                                 | NCL       | 2.4457  | -1.7961 | -3.4302 | 0.0823 | 0.1993 | 0.0189 |
| Protein NDRG1                                                                             | NDRG1     | -0.4589 | -4.5992 | -4.2037 | 0.7996 | 0.0020 | 0.0053 |
| Isoform 2 of Protein NDRG2                                                                | NDRG2     | 0.1192  | -4.7036 | -4.7001 | 0.9493 | 0.0017 | 0.0023 |
| Isoform 2 of NADH dehydrogenase [ubiquinone] 1 alpha subcomplex subunit 10, mitochondrial | NDUFA10   | -6.9077 | -1.5850 | 3.1504  | 0.0000 | 0.2596 | 0.0288 |
| NADH dehydrogenase [ubiquinone] 1 alpha subcomplex subunit 2                              | NDUFA2    | 13.0288 | 9.7725  | 0.7188  | 0.0000 | 0.0000 | 0.6606 |
| NADH dehydrogenase [ubiquinone] 1 alpha subcomplex subunit 9, mitochondrial               | NDUFA9    | 1.4997  | 0.1999  | -0.8256 | 0.3129 | 0.9001 | 0.6171 |
| Isoform 2 of NADH-ubiquinone oxidoreductase 75 kDa subunit, mitochondrial                 | NDUFS1    | -1.2457 | 2.4394  | 3.2442  | 0.4110 | 0.0763 | 0.0248 |
| Isoform 2 of NADH dehydrogenase [ubiquinone] iron-sulfur protein 2, mitochondrial         | NDUFS2    | -0.3714 | -1.2436 | -0.9681 | 0.8367 | 0.3939 | 0.5352 |
| NADH dehydrogenase [ubiquinone] iron-sulfur protein 3, mitochondrial                      | NDUFS3    | 2.4766  | 10.6524 | 8.7730  | 0.0788 | 0.0000 | 0.0000 |
| Isoform 2 of NADH dehydrogenase [ubiquinone] flavoprotein 1, mitochondrial                | NDUFV1    | -5.9006 | 0.2494  | 4.2655  | 0.0002 | 0.8771 | 0.0048 |
| Isoform 2 of Nebulette                                                                    | NEBL      | -4.1455 | -4.8806 | -1.9680 | 0.0045 | 0.0013 | 0.1770 |
| Cluster of Neurofilament heavy polypeptide                                                | NEFH      | 17.5472 | 11.6564 | -0.5101 | 0.0000 | 0.0000 | 0.7702 |
| Nestin                                                                                    | NES       | -2.1950 | -1.6018 | -0.0773 | 0.1211 | 0.2551 | 0.9633 |
| Isoform 11 of Neurofascin                                                                 | NFASC     | 1.7975  | 0.4759  | -0.7575 | 0.2140 | 0.7782 | 0.6425 |
| Isoform 2 of NHL repeat-containing protein 2                                              | NHLRC2    | 0.0417  | -4.8345 | -4.7758 | 0.9771 | 0.0014 | 0.0020 |
| Isoform 2 of Protein Niban 2                                                              | NIBAN2    | 1.5668  | 3.9387  | 2.8001  | 0.2893 | 0.0063 | 0.0499 |
| Nidogen-1                                                                                 | NID1      | 2.0869  | -0.2896 | -1.7064 | 0.1430 | 0.8588 | 0.2488 |
| Nidogen-2                                                                                 | NID2      | 1.4348  | -0.3582 | -1.3294 | 0.3342 | 0.8307 | 0.3815 |
| Protein NipSnap homolog 3A                                                                | NIPSNAP3A | -1.0630 | -7.8021 | -6.9372 | 0.5027 | 0.0000 | 0.0001 |
| Isoform 1 of Deaminated glutathione amidase                                               | NIT1      | -0.3566 | -0.1470 | 0.0986  | 0.8459 | 0.9226 | 0.9548 |
| Omega-amidase NIT2                                                                        | NIT2      | -7.0028 | -7.1106 | -2.2108 | 0.0000 | 0.0000 | 0.1235 |
| Neurolysin, mitochondrial                                                                 | NLN       | 2.6635  | 0.6701  | -1.1569 | 0.0595 | 0.6765 | 0.4556 |
| Isoform 3 of Nucleoside diphosphate kinase B                                              | NME2      | 0.7698  | 1.3072  | 0.7591  | 0.6521 | 0.3689 | 0.6422 |
| NAD(P) transhydrogenase, mitochondrial                                                    | NNT       | 2.2113  | 1.3213  | -0.2093 | 0.1188 | 0.3636 | 0.9038 |
| Nodal modulator 3                                                                         | NOMO3     | 0.5229  | -0.6811 | -1.0251 | 0.7703 | 0.6709 | 0.5126 |
| Non-POU domain-containing octamer-binding protein                                         | NONO      | 0.2644  | -0.0151 | -0.1950 | 0.8833 | 0.9903 | 0.9094 |
| Neurogenic locus notch homolog protein 4                                                  | NOTCH4    | 0.4484  | -0.7214 | -1.0139 | 0.8022 | 0.6515 | 0.5173 |

|                                                                        |          |         |         |         |        |        |        |
|------------------------------------------------------------------------|----------|---------|---------|---------|--------|--------|--------|
| Puromycin-sensitive aminopeptidase                                     | NPEPPS   | -0.2073 | -1.8579 | -1.6831 | 0.9128 | 0.1842 | 0.2552 |
| Isoform 2 of Nephhrin                                                  | NPHS1    | 0.3107  | -1.7504 | -1.9306 | 0.8652 | 0.2101 | 0.1868 |
| Podocin                                                                | NPHS2    | -1.2556 | -3.6292 | -2.7083 | 0.4058 | 0.0105 | 0.0577 |
| Isoform 2 of Nucleophosmin                                             | NPM1     | 18.8567 | -0.8130 | 13.6470 | 0.0000 | 0.6054 | 0.0000 |
| Cluster of Isoform 6 of Nephronectin                                   | NPNT     | -1.3459 | 0.5785  | 1.4851  | 0.3696 | 0.7196 | 0.3234 |
| Ribosyldihyronicotinamide dehydrogenase [quinone]                      | NQO2     | -0.0660 | -8.3478 | -8.1524 | 0.9677 | 0.0000 | 0.0000 |
| Isoform 2 of Nuclear receptor-interacting protein 2                    | NRIP2    | -1.8310 | -1.0362 | 0.2301  | 0.2049 | 0.4901 | 0.8970 |
| Isoform 2 of Neuropilin-1                                              | NRP1     | -4.0827 | 0.0316  | 2.8129  | 0.0050 | 0.9822 | 0.0489 |
| Isoform 3 of NSFL1 cofactor p47                                        | NSFL1C   | 1.0633  | -0.3490 | -1.0672 | 0.5027 | 0.8337 | 0.4956 |
| 5'(3')-deoxyribonucleotidase, cytosolic type                           | NT5C     | -0.9320 | 0.1702  | 0.8022  | 0.5618 | 0.9131 | 0.6276 |
| Cytosolic purine 5'-nucleotidase                                       | NT5C2    | 0.2915  | 0.7771  | 0.5644  | 0.8710 | 0.6256 | 0.7424 |
| Isoform 3 of Netrin-4                                                  | NTN4     | -1.0614 | 2.7772  | 3.4504  | 0.5029 | 0.0447 | 0.0183 |
| Nucleobindin-1                                                         | NUCB1    | 1.3371  | 0.4368  | -0.4821 | 0.3733 | 0.7977 | 0.7808 |
| U8 snoRNA-decapping enzyme                                             | NUDT16   | 1.8019  | -1.2984 | -2.5028 | 0.2130 | 0.3714 | 0.0779 |
| Nucleoredoxin                                                          | NXN      | 2.2416  | 1.3986  | -0.1540 | 0.1130 | 0.3284 | 0.9252 |
| Isoform p41 of 2'-5'-oligoadenylate synthase 1                         | OAS1     | -4.8176 | -0.6554 | 2.6390  | 0.0013 | 0.6868 | 0.0636 |
| 2'-5'-oligoadenylate synthase 2                                        | OAS2     | 1.9902  | 3.1768  | 1.7635  | 0.1644 | 0.0221 | 0.2307 |
| Isoform B of Inositol polyphosphate 5-phosphatase OCRL                 | OCRL     | -0.2369 | 1.1819  | 1.3220  | 0.8958 | 0.4208 | 0.3849 |
| Isoform 2 of 2-oxoglutarate dehydrogenase, mitochondrial               | OGDH     | 0.5035  | 0.8773  | 0.5184  | 0.7769 | 0.5705 | 0.7672 |
| Obg-like ATPase 1                                                      | OLA1     | 0.8632  | -0.1887 | -0.7735 | 0.6018 | 0.9044 | 0.6387 |
| Isoform 2 of Optineurin                                                | OPTN     | -0.9721 | -2.0822 | -1.3823 | 0.5441 | 0.1294 | 0.3607 |
| Alpha-1-acid glycoprotein 1                                            | ORM1     | 0.2492  | 4.6008  | 4.3480  | 0.8898 | 0.0020 | 0.0042 |
| Alpha-1-acid glycoprotein 2                                            | ORM2     | 1.5774  | 7.6639  | 6.4510  | 0.2854 | 0.0000 | 0.0001 |
| Osteoclast-stimulating factor 1                                        | OSTF1    | -2.0582 | -3.2641 | -1.8028 | 0.1487 | 0.0191 | 0.2218 |
| Ubiquitin thioesterase OTUB1                                           | OTUB1    | -1.2979 | 3.7608  | 4.5774  | 0.3904 | 0.0086 | 0.0029 |
| Succinyl-CoA:3-ketoacid coenzyme A transferase 1, mitochondrial        | OXCT1    | 6.7689  | 2.7375  | -1.9241 | 0.0000 | 0.0473 | 0.1883 |
| Protein disulfide-isomerase                                            | P4HB     | 2.7302  | 1.1647  | -0.7166 | 0.0532 | 0.4285 | 0.6617 |
| Isoform 2 of Proliferation-associated protein 2G4                      | PA2G4    | -2.9167 | 2.1304  | 4.0794  | 0.0390 | 0.1214 | 0.0064 |
| Cluster of Polyadenylate-binding protein 3                             | PABPC3   | 13.6214 | 8.9751  | -0.4681 | 0.0000 | 0.0000 | 0.7848 |
| Cluster of Platelet-activating factor acetylhydrolase IB subunit alpha | PAFAH1B1 | 2.7356  | 4.4649  | 2.5205  | 0.0528 | 0.0026 | 0.0756 |
| Cluster of Platelet-activating factor acetylhydrolase IB subunit beta  | PAFAH1B2 | 0.1463  | -1.5869 | -1.6580 | 0.9399 | 0.2591 | 0.2641 |
| Isoform 2 of Serine/threonine-protein kinase PAK 1                     | PAK1     | 4.0378  | 2.3383  | -0.4552 | 0.0054 | 0.0898 | 0.7900 |

|                                                                                             |         |          |          |         |        |        |        |
|---------------------------------------------------------------------------------------------|---------|----------|----------|---------|--------|--------|--------|
| Palladin                                                                                    | PALLD   | -0.3864  | -0.8548  | -0.5760 | 0.8274 | 0.5840 | 0.7344 |
| Cluster of Papilin                                                                          | PAPLN   | 0.6166   | -0.9353  | -1.3386 | 0.7309 | 0.5409 | 0.3790 |
| Bifunctional 3'-phosphoadenosine 5'-phosphosulfate synthase 1                               | PAPSS1  | 0.3474   | -0.1523  | -0.3863 | 0.8495 | 0.9204 | 0.8275 |
| Isoform 2 of Partitioning defective 3 homolog B                                             | PARD3B  | -1.9711  | -4.3909  | -2.9687 | 0.1697 | 0.0029 | 0.0386 |
| Protein/nucleic acid deglycase DJ-1                                                         | PARK7   | -0.2093  | -2.8388  | -2.6451 | 0.9119 | 0.0401 | 0.0634 |
| Poly [ADP-ribose] polymerase 1                                                              | PARP1   | 4.1385   | 1.8512   | -1.0021 | 0.0045 | 0.1858 | 0.5203 |
| Alpha-parvin                                                                                | PARVA   | -0.9902  | -3.6007  | -2.8611 | 0.5366 | 0.0111 | 0.0448 |
| InaD-like protein                                                                           | PATJ    | 0.8268   | 1.4799   | 0.8898  | 0.6220 | 0.2992 | 0.5808 |
| PRKC apoptosis WT1 regulator protein                                                        | PAWR    | -0.9423  | 6.8431   | 7.3619  | 0.5588 | 0.0001 | 0.0000 |
| Phenazine biosynthesis-like domain-containing protein                                       | PBLD    | 0.2316   | -9.7399  | -9.7222 | 0.8991 | 0.0000 | 0.0000 |
| Pyruvate carboxylase, mitochondrial                                                         | PC      | -0.3122  | -0.7235  | -0.4977 | 0.8647 | 0.6504 | 0.7743 |
| Pterin-4-alpha-carbinolamine dehydratase                                                    | PCBD1   | -1.6004  | 0.4398   | 1.5224  | 0.2765 | 0.7972 | 0.3107 |
| Poly(rC)-binding protein 1                                                                  | PCBP1   | -0.3131  | -1.7927  | -1.5471 | 0.8646 | 0.2000 | 0.3008 |
| Isoform 2 of Poly(rC)-binding protein 2                                                     | PCBP2   | 1.0344   | -0.3001  | -0.9995 | 0.5158 | 0.8549 | 0.5208 |
| Isoform 2 of Propionyl-CoA carboxylase beta chain, mitochondrial                            | PCCB    | 1.6938   | -0.6531  | -1.7954 | 0.2459 | 0.6880 | 0.2240 |
| Phosphoenolpyruvate carboxykinase [GTP], mitochondrial                                      | PCK2    | -22.5599 | -10.8067 | 4.7600  | 0.0000 | 0.0000 | 0.0021 |
| Isoform 2 of Protein-L-isoaspartate(D-aspartate) O-methyltransferase                        | PCMT1   | -18.3185 | -14.1704 | -1.4331 | 0.0000 | 0.0000 | 0.3427 |
| Prenylcysteine oxidase 1                                                                    | PCYOX1  | 0.5072   | -0.4216  | -0.7597 | 0.7769 | 0.7997 | 0.6422 |
| Programmed cell death protein 10                                                            | PDCD10  | -7.2889  | -0.2537  | 4.7174  | 0.0000 | 0.8763 | 0.0023 |
| Isoform 2 of Programmed cell death protein 6                                                | PDCD6   | -0.0695  | -2.8163  | -2.7182 | 0.9677 | 0.0416 | 0.0572 |
| Isoform 2 of Programmed cell death 6-interacting protein                                    | PDCD6IP | -1.2792  | -2.5782  | -1.6601 | 0.3988 | 0.0609 | 0.2636 |
| Platelet-derived growth factor receptor beta                                                | PDGFRB  | -0.4376  | 1.7412   | 2.0080  | 0.8090 | 0.2116 | 0.1659 |
| Isoform 2 of Pyruvate dehydrogenase E1 component subunit alpha, somatic form, mitochondrial | PDHA1   | -5.2044  | -0.6120  | 2.9453  | 0.0007 | 0.7072 | 0.0401 |
| Isoform 3 of Pyruvate dehydrogenase E1 component subunit beta, mitochondrial                | PDHB    | 1.0238   | 4.3201   | 3.5447  | 0.5219 | 0.0033 | 0.0159 |
| Protein disulfide-isomerase A3                                                              | PDIA3   | 1.6213   | -1.3089  | -2.3900 | 0.2695 | 0.3684 | 0.0931 |
| Protein disulfide-isomerase A4                                                              | PDIA4   | 1.1694   | -2.5730  | -3.3234 | 0.4468 | 0.0614 | 0.0220 |
| Isoform 2 of Protein disulfide-isomerase A6                                                 | PDIA6   | 4.0557   | -0.4479  | -3.2033 | 0.0052 | 0.7924 | 0.0265 |
| PDZ and LIM domain protein 1                                                                | PDLIM1  | -0.4008  | -0.6287  | -0.3442 | 0.8234 | 0.6992 | 0.8452 |
| Cluster of Isoform 5 of PDZ and LIM domain protein 2                                        | PDLIM2  | -3.0443  | -2.3248  | -0.2086 | 0.0315 | 0.0913 | 0.9038 |



|                                                                           |         |         |         |         |        |        |        |
|---------------------------------------------------------------------------|---------|---------|---------|---------|--------|--------|--------|
| Cluster of PDZ and LIM domain protein 5                                   | PDLIM5  | -3.4905 | -3.4863 | -1.0451 | 0.0143 | 0.0131 | 0.5063 |
| Cluster of Isoform 2 of PDZ and LIM domain protein 7                      | PDLIM7  | -1.4464 | -1.7994 | -0.7814 | 0.3302 | 0.1985 | 0.6354 |
| Pyridoxal kinase                                                          | PDXK    | 1.4563  | -1.1392 | -2.1110 | 0.3279 | 0.4420 | 0.1423 |
| Phosphatidylethanolamine-binding protein 1                                | PEBP1   | -2.2864 | -5.2361 | -3.5838 | 0.1052 | 0.0007 | 0.0151 |
| Cluster of Isoform Delta13 of Platelet endothelial cell adhesion molecule | PECAM1  | 4.9754  | 0.9132  | -2.4934 | 0.0010 | 0.5526 | 0.0790 |
| Peflin                                                                    | PEF1    | -1.3189 | -0.0772 | 0.8229  | 0.3812 | 0.9575 | 0.6186 |
| Isoform 2 of Xaa-Pro dipeptidase                                          | PEPD    | -2.9814 | -2.1555 | -0.0852 | 0.0350 | 0.1180 | 0.9607 |
| Isoform 2 of ATP-dependent 6-phosphofructokinase, liver type              | PFKL    | 1.5357  | -0.4737 | -1.5116 | 0.3002 | 0.7794 | 0.3145 |
| ATP-dependent 6-phosphofructokinase, platelet type                        | PFKP    | 3.5945  | 2.2577  | -0.2322 | 0.0121 | 0.1008 | 0.8968 |
| Profilin-1                                                                | PFN1    | 2.6301  | 0.0504  | -1.7426 | 0.0626 | 0.9716 | 0.2362 |
| Isoform IIb of Profilin-2                                                 | PFN2    | -0.0794 | -3.5794 | -3.4608 | 0.9646 | 0.0114 | 0.0180 |
| Phosphoglycerate mutase 1                                                 | PGAM1   | 1.4912  | -2.1816 | -3.1584 | 0.3158 | 0.1139 | 0.0285 |
| Isoform 2 of 6-phosphogluconate dehydrogenase, decarboxylating            | PGD     | -0.2248 | -3.1185 | -2.9091 | 0.9017 | 0.0243 | 0.0417 |
| Phosphoglycerate kinase 1                                                 | PGK1    | -0.4429 | -3.7496 | -3.3802 | 0.8056 | 0.0087 | 0.0200 |
| 6-phosphogluconolactonase                                                 | PGLS    | 0.5885  | -2.2891 | -2.6489 | 0.7395 | 0.0965 | 0.0631 |
| Isoform 2 of N-acetylmuramoyl-L-alanine amidase                           | PGLYRP2 | 0.1192  | 0.6038  | 0.5117  | 0.9493 | 0.7088 | 0.7702 |
| Isoform 2 of Phosphoglucomutase-1                                         | PGM1    | -5.1139 | -4.6467 | -1.0785 | 0.0008 | 0.0019 | 0.4902 |
| Phosphoglucomutase-2                                                      | PGM2    | 5.6560  | -0.8127 | -4.6520 | 0.0003 | 0.6054 | 0.0025 |
| Phosphoglucomutase-like protein 5                                         | PGM5    | 1.3551  | -0.7035 | -1.6141 | 0.3653 | 0.6580 | 0.2782 |
| Membrane-associated progesterone receptor component 1                     | PGRMC1  | 3.9072  | 0.9257  | -1.7533 | 0.0068 | 0.5475 | 0.2345 |
| Isoform 2 of Membrane-associated progesterone receptor component 2        | PGRMC2  | -2.4781 | 3.3911  | 5.0185  | 0.0788 | 0.0153 | 0.0014 |
| Isoform 3 of Phosphatase and actin regulator 4                            | PHACTR4 | -0.5169 | -0.6395 | -0.2757 | 0.7734 | 0.6929 | 0.8827 |
| Prohibitin                                                                | PHB     | -0.5491 | -0.5424 | -0.1585 | 0.7596 | 0.7409 | 0.9243 |
| Isoform 2 of Prohibitin-2                                                 | PHB2    | -0.4954 | -1.2715 | -0.9110 | 0.7785 | 0.3829 | 0.5675 |
| D-3-phosphoglycerate dehydrogenase                                        | PHGDH   | -0.2882 | -1.9173 | -1.6864 | 0.8727 | 0.1680 | 0.2543 |
| Isoform 2 of Pleckstrin homology-like domain family B member 1            | PHLDB1  | -0.0022 | -1.6248 | -1.5940 | 0.9997 | 0.2484 | 0.2847 |
| Cluster of Phosphatidylinositol 4-kinase alpha                            | PI4KA   | 1.4311  | -0.5114 | -1.4773 | 0.3357 | 0.7589 | 0.3252 |
| Isoform 2 of Phosphatidylinositol-binding clathrin assembly protein       | PICALM  | 0.9843  | -2.7731 | -3.3938 | 0.5387 | 0.0449 | 0.0196 |
| Polymeric immunoglobulin receptor                                         | PIGR    | 10.9965 | 7.4327  | -0.1941 | 0.0000 | 0.0000 | 0.9094 |

|                                                                            |          |         |         |         |        |        |        |
|----------------------------------------------------------------------------|----------|---------|---------|---------|--------|--------|--------|
| Prolactin-inducible protein                                                | PIP      | -9.8637 | -0.2264 | 6.4987  | 0.0000 | 0.8893 | 0.0001 |
| Isoform 2 of Phosphatidylinositol 5-phosphate 4-kinase type-2 gamma        | PIP4K2C  | -0.3519 | -2.0245 | -1.7482 | 0.8482 | 0.1421 | 0.2354 |
| Phosphatidylinositol transfer protein alpha isoform                        | PITPNA   | -6.8195 | -0.8543 | 3.8078  | 0.0000 | 0.5840 | 0.0102 |
| Pyruvate kinase PKM                                                        | PKM      | 3.2399  | 0.4718  | -1.7444 | 0.0227 | 0.7796 | 0.2362 |
| Isoform 1 of Plakophilin-1                                                 | PKP1     | -2.8660 | -1.7496 | 0.2348  | 0.0427 | 0.2101 | 0.8955 |
| Isoform 2 of Plakophilin-4                                                 | PKP4     | 0.4262  | -1.4254 | -1.6901 | 0.8134 | 0.3175 | 0.2535 |
| Secretory phospholipase A2 receptor                                        | PLA2R1   | 4.0208  | 4.0980  | 1.2844  | 0.0056 | 0.0049 | 0.4008 |
| 1-phosphatidylinositol 4,5-bisphosphate phosphodiesterase gamma-2          | PLCG2    | -6.1081 | -2.4149 | 1.7905  | 0.0001 | 0.0796 | 0.2253 |
| Cluster of Plectin                                                         | PLEC     | 0.9405  | 0.3707  | -0.2768 | 0.5592 | 0.8259 | 0.8827 |
| Pleckstrin homology domain-containing family O member 2                    | PLEKHO2  | -0.3477 | -0.6817 | -0.4325 | 0.8495 | 0.6709 | 0.8041 |
| Plasminogen                                                                | PLG      | 2.3528  | 0.4956  | -1.1165 | 0.0958 | 0.7683 | 0.4740 |
| Cluster of Isoform 4 of Perilipin-3                                        | PLIN3    | 3.7827  | 3.0731  | 0.4402  | 0.0086 | 0.0262 | 0.7996 |
| Multifunctional procollagen lysine hydroxylase and glycosyltransferase LH3 | PLOD3    | 2.5640  | 0.9213  | -0.8424 | 0.0685 | 0.5484 | 0.6081 |
| Cluster of Plastin-3                                                       | PLS3     | 0.6211  | -0.1959 | -0.6156 | 0.7284 | 0.9027 | 0.7150 |
| Cluster of Isoform PML-11 of Protein PML                                   | PML      | 3.9209  | 2.7401  | 0.0191  | 0.0067 | 0.0472 | 0.9900 |
| Purine nucleoside phosphorylase                                            | PNP      | -0.0271 | -4.0073 | -3.9166 | 0.9851 | 0.0057 | 0.0084 |
| Pyridoxine-5'-phosphate oxidase                                            | PNPO     | -3.2730 | -0.4001 | 1.8372  | 0.0214 | 0.8124 | 0.2119 |
| Isoform 2 of Podocalyxin                                                   | PODXL    | -2.4075 | -4.2798 | -2.5623 | 0.0881 | 0.0035 | 0.0714 |
| Protein O-glycosyltransferase 3                                            | POGLUT3  | 2.2993  | 1.3478  | -0.2432 | 0.1036 | 0.3508 | 0.8899 |
| Serum paraoxonase/arylesterase 1                                           | PON1     | 2.7648  | 1.7541  | -0.1614 | 0.0502 | 0.2093 | 0.9236 |
| Isoform 1 of Serum paraoxonase/arylesterase 2                              | PON2     | -0.1471 | -3.2765 | -3.1173 | 0.9399 | 0.0187 | 0.0301 |
| NADPH--cytochrome P450 reductase                                           | POR      | -5.1114 | -0.1910 | 3.2953  | 0.0008 | 0.9043 | 0.0232 |
| Periostin                                                                  | POSTN    | 2.3408  | 2.4784  | 0.8387  | 0.0974 | 0.0714 | 0.6086 |
| Inorganic pyrophosphatase                                                  | PPA1     | 8.5398  | 4.6615  | -1.2414 | 0.0000 | 0.0019 | 0.4209 |
| Cluster of Peptidyl-prolyl cis-trans isomerase A                           | PPIA     | -0.1055 | -2.1395 | -2.0291 | 0.9533 | 0.1201 | 0.1605 |
| Peptidyl-prolyl cis-trans isomerase B                                      | PPIB     | 3.8323  | 0.4513  | -2.1680 | 0.0078 | 0.7908 | 0.1306 |
| Protein phosphatase 1F                                                     | PPM1F    | -1.7890 | -1.6183 | -0.3701 | 0.2158 | 0.2497 | 0.8357 |
| Cluster of Serine/threonine-protein phosphatase PP1-beta catalytic subunit | PPP1CB   | 1.2172  | 0.2789  | -0.5555 | 0.4256 | 0.8640 | 0.7458 |
| Protein phosphatase 1 regulatory subunit 12A                               | PPP1R12A | 0.3748  | 3.1246  | 2.8129  | 0.8353 | 0.0241 | 0.0489 |
| Protein phosphatase 1 regulatory subunit 26                                | PPP1R26  | -1.1075 | -1.4957 | -0.7141 | 0.4784 | 0.2926 | 0.6617 |

|                                                                                               |         |         |         |         |        |        |        |
|-----------------------------------------------------------------------------------------------|---------|---------|---------|---------|--------|--------|--------|
| Serine/threonine-protein phosphatase 2A catalytic subunit beta isoform                        | PPP2CB  | 0.8503  | 3.5746  | 2.9308  | 0.6094 | 0.0115 | 0.0404 |
| Serine/threonine-protein phosphatase 2A 65 kDa regulatory subunit A alpha isoform             | PPP2R1A | 1.7912  | -1.3759 | -2.5717 | 0.2158 | 0.3371 | 0.0703 |
| Isoform 2 of Serine/threonine-protein phosphatase 2A 65 kDa regulatory subunit A beta isoform | PPP2R1B | -0.8840 | -5.5780 | -4.8751 | 0.5897 | 0.0004 | 0.0017 |
| PRA1 family protein 2                                                                         | PRAF2   | -0.4987 | 4.1746  | 4.4392  | 0.7785 | 0.0042 | 0.0036 |
| Peroxiredoxin-1                                                                               | PRDX1   | -1.7539 | -3.3423 | -2.0870 | 0.2256 | 0.0167 | 0.1471 |
| Cluster of Peroxiredoxin-2                                                                    | PRDX2   | -1.2936 | -3.8954 | -2.9438 | 0.3917 | 0.0068 | 0.0401 |
| Isoform 2 of Thioredoxin-dependent peroxide reductase, mitochondrial                          | PRDX3   | -0.0519 | -0.8435 | -0.7930 | 0.9732 | 0.5893 | 0.6305 |
| Peroxiredoxin-4                                                                               | PRDX4   | -2.3299 | 11.0749 | 12.4629 | 0.0989 | 0.0000 | 0.0000 |
| Cluster of Isoform Cytoplasmic+peroxisomal of Peroxiredoxin-5, mitochondrial                  | PRDX5   | 0.5040  | -2.1036 | -2.4091 | 0.7769 | 0.1261 | 0.0910 |
| Peroxiredoxin-6                                                                               | PRDX6   | -1.4653 | -5.3031 | -4.2091 | 0.3247 | 0.0006 | 0.0053 |
| Prolyl endopeptidase                                                                          | PREP    | 2.0664  | 0.6712  | -0.7490 | 0.1470 | 0.6765 | 0.6470 |
| Bone marrow proteoglycan                                                                      | PRG2    | 2.0729  | 12.5644 | 10.9256 | 0.1457 | 0.0000 | 0.0000 |
| Proteoglycan 3                                                                                | PRG3    | 9.5456  | 6.4648  | -0.1559 | 0.0000 | 0.0001 | 0.9252 |
| Isoform 3 of 5'-AMP-activated protein kinase subunit gamma-1                                  | PRKAG1  | -0.5187 | 1.7457  | 2.0677  | 0.7732 | 0.2111 | 0.1516 |
| cAMP-dependent protein kinase type I-alpha regulatory subunit                                 | PRKAR1A | -0.0691 | 0.4969  | 0.5351  | 0.9677 | 0.7678 | 0.7571 |
| Isoform 2 of cAMP-dependent protein kinase type II-alpha regulatory subunit                   | PRKAR2A | -0.0676 | -0.5486 | -0.4927 | 0.9677 | 0.7364 | 0.7755 |
| cAMP-dependent protein kinase type II-beta regulatory subunit                                 | PRKAR2B | -0.5732 | -9.0608 | -8.5069 | 0.7463 | 0.0000 | 0.0000 |
| Cluster of Protein kinase C alpha type                                                        | PRKCA   | -0.9810 | 1.2264  | 1.8727  | 0.5403 | 0.4006 | 0.2019 |
| Protein kinase C iota type                                                                    | PRKCI   | 0.9980  | -1.1175 | -1.7774 | 0.5324 | 0.4516 | 0.2281 |
| Isoform 2 of Glucosidase 2 subunit beta                                                       | PRKCSH  | -3.9532 | -3.5735 | -0.8155 | 0.0063 | 0.0115 | 0.6209 |
| Isoform 2 of DNA-dependent protein kinase catalytic subunit                                   | PRKDC   | 1.5779  | 1.3061  | 0.2074  | 0.2854 | 0.3691 | 0.9038 |
| Vitamin K-dependent protein S                                                                 | PROS1   | 4.1937  | 2.6210  | -0.2837 | 0.0041 | 0.0570 | 0.8818 |
| Pre-mRNA-processing-splicing factor 8                                                         | PRPF8   | -1.9216 | -1.6380 | -0.2992 | 0.1816 | 0.2438 | 0.8743 |
| Serine protease 23                                                                            | PRSS23  | 8.7998  | 4.8519  | -1.2316 | 0.0000 | 0.0014 | 0.4244 |
| Periaxin                                                                                      | PRX     | 1.4515  | -0.2021 | -1.1875 | 0.3288 | 0.8990 | 0.4457 |
| Phosphoserine aminotransferase                                                                | PSAT1   | 0.1954  | -3.7240 | -3.7901 | 0.9192 | 0.0090 | 0.0105 |
| Isoform Long of Proteasome subunit alpha type-1                                               | PSMA1   | 0.4808  | -2.3693 | -2.6542 | 0.7863 | 0.0853 | 0.0627 |
| Proteasome subunit alpha type-2                                                               | PSMA2   | 1.8949  | -2.1335 | -3.3862 | 0.1889 | 0.1211 | 0.0199 |
| Proteasome subunit alpha type-4                                                               | PSMA4   | -0.3882 | -8.1263 | -7.7154 | 0.8273 | 0.0000 | 0.0000 |
| Proteasome subunit alpha type-5                                                               | PSMA5   | 2.3149  | -1.8815 | -3.4249 | 0.1016 | 0.1782 | 0.0190 |

|                                                                |        |         |         |         |        |        |        |
|----------------------------------------------------------------|--------|---------|---------|---------|--------|--------|--------|
| Proteasome subunit alpha type-6                                | PSMA6  | -0.7251 | 0.0967  | 0.5890  | 0.6759 | 0.9509 | 0.7284 |
| Cluster of Proteasome subunit alpha type-7                     | PSMA7  | 5.1945  | 0.8232  | -2.7311 | 0.0007 | 0.6009 | 0.0560 |
| Proteasome subunit beta type-1                                 | PSMB1  | -1.9027 | -1.6024 | -0.2771 | 0.1869 | 0.2551 | 0.8827 |
| Proteasome subunit beta type-2                                 | PSMB2  | -0.2516 | -8.4868 | -8.1625 | 0.8898 | 0.0000 | 0.0000 |
| Proteasome subunit beta type-3                                 | PSMB3  | 2.4577  | 6.9469  | 5.1471  | 0.0808 | 0.0001 | 0.0011 |
| Proteasome subunit beta type-4                                 | PSMB4  | 2.8406  | 0.7179  | -1.2306 | 0.0444 | 0.6537 | 0.4244 |
| Proteasome subunit beta type-6                                 | PSMB6  | 0.8498  | -1.0475 | -1.6076 | 0.6094 | 0.4844 | 0.2799 |
| Proteasome subunit beta type-7                                 | PSMB7  | -0.1395 | -2.9629 | -2.8144 | 0.9420 | 0.0320 | 0.0489 |
| Proteasome subunit beta type-8                                 | PSMB8  | -1.8412 | 2.6575  | 3.8642  | 0.2019 | 0.0541 | 0.0092 |
| Proteasome subunit beta type-9                                 | PSMB9  | 13.1044 | 7.6021  | -1.4641 | 0.0000 | 0.0000 | 0.3299 |
| 26S proteasome regulatory subunit 4                            | PSMC1  | 4.0590  | 2.5208  | -0.2904 | 0.0052 | 0.0666 | 0.8783 |
| 26S proteasome regulatory subunit 7                            | PSMC2  | -2.6760 | -1.0266 | 0.8152  | 0.0583 | 0.4957 | 0.6209 |
| 26S proteasome regulatory subunit 6A                           | PSMC3  | -2.6652 | -1.8543 | -0.0048 | 0.0595 | 0.1850 | 0.9962 |
| Isoform 2 of 26S proteasome regulatory subunit 6B              | PSMC4  | -5.1158 | -6.2637 | -2.6651 | 0.0008 | 0.0002 | 0.0615 |
| 26S proteasome regulatory subunit 10B                          | PSMC6  | 0.4576  | 2.1821  | 1.8309  | 0.7998 | 0.1139 | 0.2139 |
| Isoform 2 of 26S proteasome non-ATPase regulatory subunit 11   | PSMD11 | -1.3383 | -2.2874 | -1.3343 | 0.3731 | 0.0966 | 0.3798 |
| 26S proteasome non-ATPase regulatory subunit 12                | PSMD12 | 2.9287  | 2.1736  | 0.1388  | 0.0381 | 0.1148 | 0.9316 |
| 26S proteasome non-ATPase regulatory subunit 14                | PSMD14 | 5.8390  | 3.3054  | -0.7327 | 0.0002 | 0.0178 | 0.6556 |
| Cluster of 26S proteasome non-ATPase regulatory subunit 2      | PSMD2  | 3.2953  | -0.4766 | -2.7134 | 0.0206 | 0.7782 | 0.0575 |
| 26S proteasome non-ATPase regulatory subunit 3                 | PSMD3  | 2.6483  | 1.6685  | -0.1661 | 0.0611 | 0.2333 | 0.9236 |
| 26S proteasome non-ATPase regulatory subunit 8                 | PSMD8  | -0.1618 | -3.7598 | -3.5818 | 0.9329 | 0.0086 | 0.0151 |
| Proteasome activator complex subunit 1                         | PSME1  | -1.1873 | -1.5639 | -0.7267 | 0.4398 | 0.2664 | 0.6567 |
| Proteasome activator complex subunit 2                         | PSME2  | -0.8251 | -1.7385 | -1.1450 | 0.6227 | 0.2123 | 0.4611 |
| Paraspeckle component 1                                        | PSPC1  | 2.3946  | 1.2618  | -0.3926 | 0.0894 | 0.3862 | 0.8256 |
| Cluster of Isoform 2 of Polypyrimidine tract-binding protein 1 | PTBP1  | -0.1395 | -1.5271 | -1.4046 | 0.9420 | 0.2800 | 0.3533 |
| Isoform 3 of Prostaglandin E synthase 3                        | PTGES3 | 12.1134 | 0.4923  | -7.7705 | 0.0000 | 0.7693 | 0.0000 |
| Isoform 2 of Prostaglandin reductase 1                         | PTGR1  | 1.3704  | 7.1341  | 6.0718  | 0.3593 | 0.0000 | 0.0003 |
| Isoform 1 of Serine/threonine-protein phosphatase 2A activator | PTPA   | 2.2036  | 2.5001  | 0.9535  | 0.1194 | 0.0688 | 0.5431 |
| Isoform 2 of Receptor-type tyrosine-protein phosphatase O      | PTPRO  | -0.1249 | -0.0972 | -0.0103 | 0.9482 | 0.9509 | 0.9933 |
| Isoform 2 of Poly(U)-binding-splicing factor PUF60             | PUF60  | -1.5326 | -0.6419 | 0.4140  | 0.3005 | 0.6919 | 0.8142 |

|                                                         |        |         |         |         |        |        |        |
|---------------------------------------------------------|--------|---------|---------|---------|--------|--------|--------|
| Transcriptional activator protein Pur-alpha             | PURA   | -0.6069 | -2.2698 | -1.8154 | 0.7343 | 0.0991 | 0.2184 |
| Transcriptional activator protein Pur-beta              | PURB   | 0.7167  | 0.3573  | -0.1375 | 0.6796 | 0.8308 | 0.9316 |
| Peroxidasin homolog                                     | PXDN   | -3.2371 | -2.1166 | 0.1273  | 0.0227 | 0.1236 | 0.9365 |
| Glycogen phosphorylase, brain form                      | PYGB   | 7.6361  | 3.9000  | -1.3734 | 0.0000 | 0.0068 | 0.3630 |
| Isoform 2 of Glycogen phosphorylase, liver form         | PYGL   | 2.6901  | 3.5927  | 1.6949  | 0.0570 | 0.0112 | 0.2530 |
| Sulfhydryl oxidase 2                                    | QSOX2  | -0.2122 | -0.6103 | -0.4547 | 0.9101 | 0.7076 | 0.7900 |
| Isoform 2 of Ras-related protein Rab-11B                | RAB11B | -0.5920 | 1.4514  | 1.8286  | 0.7388 | 0.3098 | 0.2144 |
| Cluster of Ras-related protein Rab-14                   | RAB14  | 0.1048  | -1.1728 | -1.2231 | 0.9533 | 0.4258 | 0.4271 |
| Isoform 2 of Ras-related protein Rab-5A                 | RAB5A  | -7.4334 | -6.7036 | -1.5179 | 0.0000 | 0.0001 | 0.3122 |
| Ras-related protein Rab-5B                              | RAB5B  | -7.2298 | -4.8667 | 0.1473  | 0.0000 | 0.0013 | 0.9298 |
| Ras-related protein Rab-5C                              | RAB5C  | 0.4784  | -1.8665 | -2.1588 | 0.7866 | 0.1817 | 0.1326 |
| Isoform 2 of Ras-related protein Rab-6A                 | RAB6A  | -2.7270 | -1.5205 | 0.3650  | 0.0533 | 0.2827 | 0.8384 |
| Ras-related protein Rab-7a                              | RAB7A  | -0.4946 | -1.3095 | -0.9489 | 0.7785 | 0.3684 | 0.5448 |
| Cluster of Ras-related C3 botulinum toxin substrate 3   | RAC3   | 13.7778 | 8.9638  | -0.5857 | 0.0000 | 0.0000 | 0.7298 |
| Receptor of activated protein C kinase 1                | RACK1  | 0.7223  | 0.0108  | -0.4816 | 0.6767 | 0.9923 | 0.7808 |
| Isoform 3 of UV excision repair protein RAD23 homolog A | RAD23A | 0.5893  | 2.9166  | 2.4625  | 0.7395 | 0.0347 | 0.0827 |
| Isoform 2 of UV excision repair protein RAD23 homolog B | RAD23B | -1.1451 | -0.5249 | 0.2648  | 0.4604 | 0.7508 | 0.8833 |
| Isoform 3 of Ankyrin                                    | RAI14  | 3.4993  | 1.7116  | -0.7036 | 0.0140 | 0.2206 | 0.6672 |
| Ras-related protein Ral-A                               | RALA   | 6.0233  | 4.6941  | 0.5053  | 0.0002 | 0.0018 | 0.7716 |
| GTP-binding nuclear protein Ran                         | RAN    | 2.4508  | 0.9399  | -0.7469 | 0.0817 | 0.5404 | 0.6473 |
| Cluster of Ras-related protein Rap-1b                   | RAP1B  | -2.1905 | -3.6330 | -2.0749 | 0.1216 | 0.0105 | 0.1499 |
| Arginine--tRNA ligase, cytoplasmic                      | RARS   | 3.0045  | 2.3565  | 0.2668  | 0.0337 | 0.0871 | 0.8827 |
| Ras-interacting protein 1                               | RASIP1 | -2.8308 | -4.7958 | -2.7805 | 0.0452 | 0.0015 | 0.0518 |
| RNA-binding protein 14                                  | RBM14  | 3.6908  | 2.0881  | -0.4644 | 0.0102 | 0.1283 | 0.7873 |
| RNA-binding protein 3                                   | RBM3   | 0.8853  | 0.4496  | -0.1617 | 0.5894 | 0.7916 | 0.9236 |
| Isoform 2 of RNA-binding protein 39                     | RBM39  | 1.9143  | 3.9645  | 2.5887  | 0.1837 | 0.0061 | 0.0689 |
| Isoform 2 of RNA-binding motif protein, X chromosome    | RBMX   | 2.4006  | -1.0257 | -2.6429 | 0.0888 | 0.4958 | 0.0634 |
| Retinol-binding protein 4                               | RBP4   | 2.4712  | 0.7054  | -0.9912 | 0.0793 | 0.6580 | 0.5257 |
| Reticulocalbin-1                                        | RCN1   | 8.8461  | 5.6721  | -0.4577 | 0.0000 | 0.0004 | 0.7900 |
| Isoform 2 of Reticulocalbin-2                           | RCN2   | 7.8523  | 4.3305  | -1.0980 | 0.0000 | 0.0032 | 0.4830 |
| Isoform 5 of Radixin                                    | RDX    | -0.9606 | -3.4285 | -2.7122 | 0.5498 | 0.0144 | 0.0575 |
| Isoform 2 of Renin                                      | REN    | -7.8431 | -0.9447 | 4.4165  | 0.0000 | 0.5377 | 0.0038 |
| Raftlin                                                 | RFTN1  | 0.5927  | 1.9203  | 1.4818  | 0.7388 | 0.1677 | 0.3243 |
| Cluster of Rho-related GTP-binding protein RhoC         | RHOC   | 0.0001  | -1.6443 | -1.6147 | 1.0000 | 0.2417 | 0.2782 |

|                                                                          |        |          |          |         |        |        |        |
|--------------------------------------------------------------------------|--------|----------|----------|---------|--------|--------|--------|
| 2-iminobutanoate/2-iminopropanoate deaminase                             | RIDA   | -29.8464 | -24.1730 | -3.4005 | 0.0000 | 0.0000 | 0.0194 |
| Isoform 3 of Rho family-interacting cell polarization regulator 1        | RIPOR1 | 3.5819   | 3.1860   | 0.6879  | 0.0123 | 0.0218 | 0.6737 |
| Eosinophil cationic protein                                              | RNASE3 | 18.7327  | 11.4503  | -1.5201 | 0.0000 | 0.0000 | 0.3114 |
| Ribonuclease inhibitor                                                   | RNH1   | -0.4257  | -1.6955  | -1.3749 | 0.8134 | 0.2252 | 0.3630 |
| Aminopeptidase B                                                         | RNPEP  | -1.4760  | 0.5770   | 1.5723  | 0.3212 | 0.7200 | 0.2922 |
| Isoform 3 of 60 kDa SS-A/Ro ribonucleoprotein                            | RO60   | -0.6976  | -2.4139  | -1.8951 | 0.6868 | 0.0796 | 0.1950 |
| Rho-associated protein kinase 2                                          | ROCK2  | 0.5968   | -1.2839  | -1.6674 | 0.7381 | 0.3779 | 0.2611 |
| 60S ribosomal protein L10                                                | RPL10  | 8.9347   | 5.9386   | -0.2564 | 0.0000 | 0.0002 | 0.8859 |
| 60S ribosomal protein L10a                                               | RPL10A | 2.0468   | 0.1697   | -1.2280 | 0.1513 | 0.9131 | 0.4245 |
| Isoform 2 of 60S ribosomal protein L11                                   | RPL11  | 1.8817   | 1.3694   | 0.0626  | 0.1915 | 0.3402 | 0.9675 |
| 60S ribosomal protein L12                                                | RPL12  | 2.6064   | 0.3658   | -1.4167 | 0.0647 | 0.8268 | 0.3494 |
| 60S ribosomal protein L13                                                | RPL13  | 0.5615   | -0.3856  | -0.7613 | 0.7504 | 0.8198 | 0.6422 |
| 60S ribosomal protein L14                                                | RPL14  | 0.8077   | -0.1662  | -0.7136 | 0.6322 | 0.9144 | 0.6617 |
| 60S ribosomal protein L15                                                | RPL15  | 0.0543   | 0.1109   | 0.0719  | 0.9727 | 0.9441 | 0.9647 |
| Isoform 3 of 60S ribosomal protein L17                                   | RPL17  | 0.7418   | 2.7224   | 2.1679  | 0.6680 | 0.0485 | 0.1306 |
| Isoform 2 of 60S ribosomal protein L18                                   | RPL18  | 1.4727   | 2.4993   | 1.4508  | 0.3220 | 0.0688 | 0.3347 |
| 60S ribosomal protein L18a                                               | RPL18A | -1.4989  | 4.6777   | 5.6148  | 0.3129 | 0.0018 | 0.0005 |
| 60S ribosomal protein L19                                                | RPL19  | 12.5844  | 8.4746   | -0.2529 | 0.0000 | 0.0000 | 0.8880 |
| 60S ribosomal protein L21                                                | RPL21  | 7.8667   | 4.3001   | -1.1376 | 0.0000 | 0.0034 | 0.4639 |
| 60S ribosomal protein L22                                                | RPL22  | 2.0830   | 1.7063   | 0.2563  | 0.1438 | 0.2220 | 0.8859 |
| 60S ribosomal protein L23                                                | RPL23  | 2.7925   | -0.1565  | -2.0564 | 0.0479 | 0.9184 | 0.1546 |
| 60S ribosomal protein L23a                                               | RPL23A | -0.2424  | 1.2797   | 1.4218  | 0.8926 | 0.3790 | 0.3471 |
| 60S ribosomal protein L24                                                | RPL24  | -0.1231  | 12.8040  | 12.6572 | 0.9483 | 0.0000 | 0.0000 |
| 60S ribosomal protein L27a                                               | RPL27A | 5.8282   | 3.7444   | -0.2943 | 0.0002 | 0.0088 | 0.8763 |
| Cluster of 60S ribosomal protein L3                                      | RPL3   | 1.8876   | -0.0946  | -1.3790 | 0.1904 | 0.9509 | 0.3612 |
| 60S ribosomal protein L4                                                 | RPL4   | 1.3433   | 0.9968   | 0.0635  | 0.3707 | 0.5097 | 0.9674 |
| 60S ribosomal protein L5                                                 | RPL5   | -0.6019  | 5.1678   | 5.4848  | 0.7358 | 0.0008 | 0.0006 |
| 60S ribosomal protein L6                                                 | RPL6   | 2.8248   | 2.7665   | 0.7919  | 0.0455 | 0.0452 | 0.6305 |
| 60S ribosomal protein L7                                                 | RPL7   | 0.4719   | 0.8117   | 0.4756  | 0.7910 | 0.6056 | 0.7812 |
| 60S ribosomal protein L7a                                                | RPL7A  | 2.1525   | 2.6575   | 1.1429  | 0.1286 | 0.0541 | 0.4620 |
| 60S ribosomal protein L8                                                 | RPL8   | -1.0012  | 0.2751   | 0.9524  | 0.5307 | 0.8656 | 0.5433 |
| 60S ribosomal protein L9                                                 | RPL9   | 1.4839   | 3.5546   | 2.4794  | 0.3177 | 0.0119 | 0.0805 |
| Cluster of 60S acidic ribosomal protein P0                               | RPLP0  | 1.7227   | 3.0479   | 1.8192  | 0.2368 | 0.0274 | 0.2173 |
| 60S acidic ribosomal protein P2                                          | RPLP2  | 1.7779   | 0.6384   | -0.5845 | 0.2184 | 0.6932 | 0.7301 |
| Dolichyl-diphosphooligosaccharide--protein glycosyltransferase subunit 1 | RPN1   | 0.8496   | 0.4924   | -0.0954 | 0.6094 | 0.7693 | 0.9559 |

|                                                                          |        |          |         |         |        |        |        |
|--------------------------------------------------------------------------|--------|----------|---------|---------|--------|--------|--------|
| Dolichyl-diphosphooligosaccharide--protein glycosyltransferase subunit 2 | RPN2   | 0.0331   | -2.2146 | -2.1972 | 0.9825 | 0.1083 | 0.1258 |
| Cluster of 40S ribosomal protein S10                                     | RPS10  | 1.1061   | 1.9551  | 1.1661  | 0.4784 | 0.1591 | 0.4526 |
| 40S ribosomal protein S13                                                | RPS13  | 1.1220   | 8.5603  | 7.6416  | 0.4705 | 0.0000 | 0.0000 |
| 40S ribosomal protein S14                                                | RPS14  | -23.7466 | -0.4004 | 15.7874 | 0.0000 | 0.8124 | 0.0000 |
| 40S ribosomal protein S15                                                | RPS15  | -4.6955  | -0.0760 | 3.1249  | 0.0016 | 0.9575 | 0.0300 |
| 40S ribosomal protein S15a                                               | RPS15A | 0.3316   | -0.8308 | -1.0419 | 0.8559 | 0.5955 | 0.5070 |
| 40S ribosomal protein S16                                                | RPS16  | 1.7231   | 1.0067  | -0.1855 | 0.2368 | 0.5054 | 0.9140 |
| 40S ribosomal protein S17                                                | RPS17  | 1.6250   | -0.4383 | -1.5377 | 0.2695 | 0.7972 | 0.3051 |
| 40S ribosomal protein S18                                                | RPS18  | 0.0847   | -0.5146 | -0.5631 | 0.9634 | 0.7576 | 0.7429 |
| 40S ribosomal protein S19                                                | RPS19  | -0.4951  | 3.8831  | 4.1505  | 0.7785 | 0.0070 | 0.0058 |
| 40S ribosomal protein S2                                                 | RPS2   | -0.0824  | 0.6075  | 0.6527  | 0.9634 | 0.7083 | 0.6949 |
| 40S ribosomal protein S20                                                | RPS20  | 0.9155   | 0.5590  | -0.0749 | 0.5704 | 0.7291 | 0.9633 |
| 40S ribosomal protein S21                                                | RPS21  | 14.8093  | 12.0969 | 1.7881  | 0.0000 | 0.0000 | 0.2253 |
| 40S ribosomal protein S23                                                | RPS23  | 1.9306   | 12.1601 | 10.6255 | 0.1792 | 0.0000 | 0.0000 |
| Isoform 3 of 40S ribosomal protein S24                                   | RPS24  | 3.0303   | 1.7703  | -0.3264 | 0.0324 | 0.2049 | 0.8575 |
| 40S ribosomal protein S26                                                | RPS26  | 1.8692   | 1.7003  | 0.3960  | 0.1936 | 0.2240 | 0.8248 |
| Ubiquitin-40S ribosomal protein S27a                                     | RPS27A | 0.2878   | -1.6854 | -1.8512 | 0.8727 | 0.2280 | 0.2073 |
| 40S ribosomal protein S28                                                | RPS28  | 1.4657   | 8.8261  | 7.6684  | 0.3247 | 0.0000 | 0.0000 |
| Cluster of 40S ribosomal protein S3                                      | RPS3   | 1.5347   | 1.3342  | 0.2644  | 0.3002 | 0.3567 | 0.8833 |
| 40S ribosomal protein S3a                                                | RPS3A  | 1.9500   | 1.2625  | -0.0890 | 0.1736 | 0.3862 | 0.9590 |
| 40S ribosomal protein S4, X isoform                                      | RPS4X  | 2.8026   | -0.2238 | -2.1294 | 0.0472 | 0.8897 | 0.1385 |
| 40S ribosomal protein S5                                                 | RPS5   | 3.0760   | -0.2905 | -2.3812 | 0.0298 | 0.8588 | 0.0934 |
| 40S ribosomal protein S6                                                 | RPS6   | 0.7004   | 0.3849  | -0.0993 | 0.6868 | 0.8198 | 0.9548 |
| 40S ribosomal protein S7                                                 | RPS7   | 2.4971   | -0.4541 | -2.1475 | 0.0764 | 0.7895 | 0.1347 |
| 40S ribosomal protein S8                                                 | RPS8   | 2.7995   | 2.6494  | 0.6942  | 0.0474 | 0.0548 | 0.6718 |
| 40S ribosomal protein S9                                                 | RPS9   | 1.7642   | 11.1421 | 9.7393  | 0.2222 | 0.0000 | 0.0000 |
| 40S ribosomal protein SA                                                 | RPSA   | 1.9977   | 0.6742  | -0.6991 | 0.1633 | 0.6746 | 0.6696 |
| Cluster of Ras-related protein R-Ras                                     | RRAS   | -2.3105  | -2.8019 | -1.1771 | 0.1020 | 0.0427 | 0.4488 |
| Ribosome-binding protein 1                                               | RRBP1  | 1.4557   | 3.1557  | 2.1069  | 0.3279 | 0.0229 | 0.1428 |
| Isoform 2 of Remodeling and spacing factor 1                             | RSF1   | -1.1838  | -1.9990 | -1.1564 | 0.4402 | 0.1484 | 0.4556 |
| Ribosomal L1 domain-containing protein 1                                 | RSL1D1 | 3.2858   | 2.7506  | 0.4622  | 0.0209 | 0.0463 | 0.7877 |
| Ras suppressor protein 1                                                 | RSU1   | -1.0409  | -2.5041 | -1.7497 | 0.5122 | 0.0684 | 0.2354 |
| tRNA-splicing ligase RtcB homolog                                        | RTCB   | -2.9787  | 3.3296  | 5.2993  | 0.0351 | 0.0170 | 0.0009 |
| Cluster of Reticulon-4                                                   | RTN4   | -0.0768  | 6.2540  | 6.1937  | 0.9648 | 0.0002 | 0.0002 |
| RNA transcription, translation and transport factor protein              | RTRAF  | 1.6223   | 0.6423  | -0.4747 | 0.2695 | 0.6919 | 0.7812 |
| RuvB-like 1                                                              | RUVBL1 | -0.7326  | 3.9734  | 4.4010  | 0.6728 | 0.0060 | 0.0038 |

|                                                                                                  |          |          |          |         |        |        |        |
|--------------------------------------------------------------------------------------------------|----------|----------|----------|---------|--------|--------|--------|
| Protein S100-A11                                                                                 | S100A11  | 0.9266   | -0.3448  | -0.9699 | 0.5654 | 0.8352 | 0.5344 |
| Protein S100-A16                                                                                 | S100A16  | -0.7774  | 1.0547   | 1.5653  | 0.6478 | 0.4812 | 0.2935 |
| Protein S100-A8                                                                                  | S100A8   | 1.3202   | 5.0198   | 4.0298  | 0.3809 | 0.0010 | 0.0070 |
| Protein S100-A9                                                                                  | S100A9   | 3.5617   | 3.0883   | 0.6058  | 0.0128 | 0.0256 | 0.7208 |
| Serum amyloid A-1 protein                                                                        | SAA1     | -7.6594  | 0.4712   | 5.6818  | 0.0000 | 0.7796 | 0.0005 |
| Serum amyloid A-2 protein                                                                        | SAA2     | -9.1017  | -0.6418  | 5.5715  | 0.0000 | 0.6919 | 0.0005 |
| SUMO-activating enzyme subunit 1                                                                 | SAE1     | -0.8476  | -1.6568  | -1.0494 | 0.6097 | 0.2378 | 0.5043 |
| Isoform 3 of Deoxynucleoside triphosphate triphosphohydrolase SAMHD1                             | SAMHD1   | -2.2815  | 1.1145   | 2.6490  | 0.1060 | 0.4526 | 0.0631 |
| Isoform 2 of GTP-binding protein SAR1a                                                           | SAR1A    | -10.9643 | -0.3053  | 7.1711  | 0.0000 | 0.8526 | 0.0000 |
| SAP domain-containing ribonucleoprotein                                                          | SARNP    | 2.5313   | 5.5566   | 3.7317  | 0.0720 | 0.0004 | 0.0117 |
| Suprabasin                                                                                       | SBSN     | -4.1001  | -0.5831  | 2.2212  | 0.0049 | 0.7182 | 0.1219 |
| Somatomedin-B and thrombospondin type-1 domain-containing protein                                | SBSPON   | 0.9723   | -3.2242  | -3.8286 | 0.5441 | 0.0202 | 0.0099 |
| Secretory carrier-associated membrane protein 3                                                  | SCAMP3   | 2.0661   | 4.5080   | 3.0190  | 0.1470 | 0.0024 | 0.0354 |
| Lysosome membrane protein 2                                                                      | SCARB2   | -0.6675  | 1.7341   | 2.1576  | 0.7032 | 0.2133 | 0.1326 |
| Isoform 2 of Sec1 family domain-containing protein 1                                             | SCFD1    | 2.2928   | 1.4250   | -0.1630 | 0.1044 | 0.3175 | 0.9236 |
| Isoform 2 of Secernin-1                                                                          | SCRN1    | -1.4407  | -1.2320  | -0.2281 | 0.3318 | 0.3982 | 0.8970 |
| Isoform 2 of Secernin-2                                                                          | SCRN2    | 7.3231   | 5.2183   | 0.1344  | 0.0000 | 0.0007 | 0.9325 |
| Isoform 2 of Syntenin-1                                                                          | SDCBP    | -8.7283  | -2.3369  | 3.6525  | 0.0000 | 0.0898 | 0.0135 |
| Cluster of Isoform 2 of Succinate dehydrogenase [ubiquinone] flavoprotein subunit, mitochondrial | SDHA     | -1.3306  | 6.2299   | 7.0243  | 0.3762 | 0.0002 | 0.0001 |
| Succinate dehydrogenase [ubiquinone] iron-sulfur subunit, mitochondrial                          | SDHB     | -4.6993  | -0.3308  | 2.8771  | 0.0016 | 0.8421 | 0.0438 |
| Vesicle-trafficking protein SEC22b                                                               | SEC22B   | -3.3246  | 5.3262   | 7.4956  | 0.0195 | 0.0006 | 0.0000 |
| Cluster of Protein transport protein Sec23A                                                      | SEC23A   | -3.7755  | -1.8180  | 0.7873  | 0.0087 | 0.1938 | 0.6332 |
| Protein transport protein Sec24C                                                                 | SEC24C   | -0.5300  | -0.4217  | -0.0529 | 0.7673 | 0.7997 | 0.9730 |
| Protein transport protein Sec61 subunit alpha isoform 1                                          | SEC61A1  | 2.3734   | 0.8042   | -0.8275 | 0.0924 | 0.6085 | 0.6162 |
| Methanethiol oxidase                                                                             | SELENBP1 | 0.2468   | -4.4245  | -4.5129 | 0.8904 | 0.0028 | 0.0032 |
| Semenogelin-1                                                                                    | SEMG1    | -8.9927  | 0.1844   | 6.3086  | 0.0000 | 0.9060 | 0.0002 |
| Semenogelin-2                                                                                    | SEMG2    | -11.1420 | -0.8382  | 6.7689  | 0.0000 | 0.5916 | 0.0001 |
| Cluster of Isoform 2 of Septin-11                                                                | SEPTIN11 | 0.2733   | -2.2636  | -2.4090 | 0.8794 | 0.1000 | 0.0910 |
| Cluster of Isoform 2 of Septin-2                                                                 | SEPTIN2  | -18.7971 | -12.4535 | 0.5789  | 0.0000 | 0.0000 | 0.7328 |
| Isoform 2 of Septin-7                                                                            | SEPTIN7  | -1.0121  | -2.5885  | -1.8522 | 0.5264 | 0.0601 | 0.2073 |
| Cluster of Isoform 2 of Septin-9                                                                 | SEPTIN9  | 0.1167   | 6.4006   | 6.2058  | 0.9493 | 0.0001 | 0.0002 |
| Isoform 2 of Plasminogen activator inhibitor 1 RNA-binding protein                               | SERBP1   | 0.3514   | -0.6085  | -0.8370 | 0.8482 | 0.7081 | 0.6092 |



|                                                                               |           |          |          |         |        |        |        |
|-------------------------------------------------------------------------------|-----------|----------|----------|---------|--------|--------|--------|
| Alpha-1-antitrypsin                                                           | SERPINA1  | 1.1834   | -1.1261  | -1.9121 | 0.4402 | 0.4475 | 0.1911 |
| Alpha-1-antichymotrypsin                                                      | SERPINA3  | 1.4907   | -0.0253  | -1.0406 | 0.3158 | 0.9858 | 0.5072 |
| Cluster of Leukocyte elastase inhibitor                                       | SERPINB1  | -0.2412  | -2.1679  | -1.9645 | 0.8929 | 0.1158 | 0.1775 |
| Isoform 2 of Serpin B12                                                       | SERPINB12 | -3.9858  | -2.5665  | 0.1956  | 0.0059 | 0.0620 | 0.9094 |
| Serpin B6                                                                     | SERPINB6  | -0.8897  | -1.8429  | -1.2035 | 0.5872 | 0.1880 | 0.4365 |
| Antithrombin-III                                                              | SERPINC1  | 1.9617   | 0.3665   | -0.9769 | 0.1720 | 0.8268 | 0.5316 |
| Heparin cofactor 2                                                            | SERPIND1  | 8.5443   | 5.8759   | -0.0520 | 0.0000 | 0.0003 | 0.9730 |
| Pigment epithelium-derived factor                                             | SERPINF1  | 0.0637   | 1.1601   | 1.0957  | 0.9687 | 0.4309 | 0.4839 |
| Isoform 2 of Alpha-2-antiplasmin                                              | SERPINF2  | 8.9638   | 0.6811   | -5.4390 | 0.0000 | 0.6709 | 0.0007 |
| Isoform 2 of Plasma protease C1 inhibitor                                     | SERPING1  | -0.0765  | 8.2846   | 8.1874  | 0.9648 | 0.0000 | 0.0000 |
| Serpin H1                                                                     | SERPINH1  | 0.6425   | -0.8582  | -1.2805 | 0.7149 | 0.5828 | 0.4022 |
| Splicing factor 3A subunit 1                                                  | SF3A1     | -0.1349  | -0.6153  | -0.5123 | 0.9436 | 0.7052 | 0.7702 |
| Splicing factor 3B subunit 1                                                  | SF3B1     | 0.7900   | -0.4232  | -0.9538 | 0.6401 | 0.7997 | 0.5431 |
| Splicing factor 3B subunit 2                                                  | SF3B2     | -3.6296  | -0.7517  | 1.7349  | 0.0114 | 0.6402 | 0.2386 |
| Splicing factor 3B subunit 3                                                  | SF3B3     | 0.0817   | 0.4776   | 0.4133  | 0.9634 | 0.7782 | 0.8142 |
| Splicing factor 3B subunit 4                                                  | SF3B4     | 1.5287   | -2.2492  | -3.2503 | 0.3016 | 0.1021 | 0.0247 |
| Splicing factor, proline- and glutamine-rich                                  | SFPQ      | -0.2826  | -1.5103  | -1.2905 | 0.8743 | 0.2864 | 0.3984 |
| Sideroflexin-3                                                                | SFXN3     | -10.6047 | -0.9709  | 6.2725  | 0.0000 | 0.5241 | 0.0002 |
| SH3 domain-binding glutamic acid-rich-like protein                            | SH3BGRL   | 1.2038   | -0.7608  | -1.5674 | 0.4332 | 0.6348 | 0.2934 |
| SH3 domain-binding glutamic acid-rich-like protein 2                          | SH3BGRL2  | -1.1902  | -3.4120  | -2.5395 | 0.4384 | 0.0147 | 0.0733 |
| Isoform 2 of Endophilin-B1                                                    | SH3GLB1   | 1.8728   | -2.1356  | -3.3732 | 0.1926 | 0.1208 | 0.0201 |
| SH3 and multiple ankyrin repeat domains protein 3                             | SHANK3    | -1.6327  | -1.5738  | -0.4329 | 0.2674 | 0.2631 | 0.8041 |
| Isoform 4 of Serine hydroxymethyltransferase, cytosolic                       | SHMT1     | -12.2012 | -9.6016  | -1.1149 | 0.0000 | 0.0000 | 0.4746 |
| Isoform 3 of Serine hydroxymethyltransferase, cytosolic                       | SHMT1     | -10.9470 | -6.0898  | 1.4790  | 0.0000 | 0.0002 | 0.3247 |
| Isoform 2 of Serine hydroxymethyltransferase, mitochondrial                   | SHMT2     | -7.2390  | 0.7726   | 5.6912  | 0.0000 | 0.6286 | 0.0005 |
| Isoform 2 of S-phase kinase-associated protein 1                              | SKP1      | -0.7348  | -11.4265 | 10.7199 | 0.6718 | 0.0000 | 0.0000 |
| Cluster of Isoform 2 of Calcium-binding mitochondrial carrier protein Aralar2 | SLC25A13  | -1.6128  | -0.2651  | 0.8386  | 0.2718 | 0.8703 | 0.6086 |
| Isoform B of Phosphate carrier protein, mitochondrial                         | SLC25A3   | 13.3341  | 0.2342   | -8.8557 | 0.0000 | 0.8856 | 0.0000 |
| Cluster of ADP/ATP translocase 2                                              | SLC25A5   | -0.1754  | -3.0768  | -2.9018 | 0.9286 | 0.0261 | 0.0421 |
| Cluster of Isoform 3 of Solute carrier family 27 member 3                     | SLC27A3   | 0.9358   | -0.0764  | -0.7127 | 0.5611 | 0.9575 | 0.6617 |
| Bile acyl-CoA synthetase                                                      | SLC27A5   | -0.9451  | -0.3778  | 0.2730  | 0.5585 | 0.8237 | 0.8827 |
| Isoform 2 of Choline transporter-like protein 2                               | SLC44A2   | -0.2732  | 0.4201   | 0.5986  | 0.8794 | 0.7997 | 0.7243 |

|                                                                           |          |         |         |         |        |        |        |
|---------------------------------------------------------------------------|----------|---------|---------|---------|--------|--------|--------|
| Band 3 anion transport protein                                            | SLC4A1   | -2.0314 | -3.6491 | -2.1992 | 0.1548 | 0.0102 | 0.1258 |
| Na(+)/H(+) exchange regulatory cofactor NHE-RF1                           | SLC9A3R1 | -1.5426 | -5.1093 | -3.9661 | 0.2977 | 0.0009 | 0.0078 |
| Cluster of Isoform 2 of Na(+)/H(+) exchange regulatory cofactor NHE-RF2   | SLC9A3R2 | -3.9523 | -3.3350 | -0.5818 | 0.0063 | 0.0169 | 0.7311 |
| Isoform 2 of STE20-like serine/threonine-protein kinase                   | SLK      | -0.4091 | -1.9184 | -1.6050 | 0.8205 | 0.1679 | 0.2807 |
| Structural maintenance of chromosomes protein 1A                          | SMC1A    | 0.3503  | -0.5012 | -0.7308 | 0.8485 | 0.7669 | 0.6559 |
| Staphylococcal nuclease domain-containing protein 1                       | SND1     | 1.4130  | 0.4223  | -0.5481 | 0.3419 | 0.7997 | 0.7489 |
| U5 small nuclear ribonucleoprotein 200 kDa helicase                       | SNRNP200 | -2.1622 | -0.1343 | 1.3415  | 0.1267 | 0.9302 | 0.3778 |
| Small nuclear ribonucleoprotein Sm D1                                     | SNRPD1   | -0.5041 | -1.5117 | -1.1410 | 0.7769 | 0.2861 | 0.4627 |
| Small nuclear ribonucleoprotein Sm D3                                     | SNRPD3   | -1.6966 | -0.4269 | 0.7368  | 0.2451 | 0.7991 | 0.6549 |
| Cluster of Beta-1-syntrophin                                              | SNTB1    | 2.4585  | 1.3518  | -0.3477 | 0.0808 | 0.3491 | 0.8452 |
| Beta-2-syntrophin                                                         | SNTB2    | 3.2072  | -1.1222 | -3.2873 | 0.0238 | 0.4493 | 0.0234 |
| Cluster of Isoform 1A of Sorting nexin-1                                  | SNX1     | -6.7735 | -0.2177 | 4.4016  | 0.0000 | 0.8923 | 0.0038 |
| Sorting nexin-5                                                           | SNX5     | 7.2570  | 4.0073  | -1.0097 | 0.0000 | 0.0057 | 0.5174 |
| Isoform 4 of Superoxide dismutase [Mn], mitochondrial                     | SOD2     | 1.3899  | 5.2557  | 4.2139  | 0.3508 | 0.0007 | 0.0052 |
| Cluster of Isoform 11 of Sorbin and SH3 domain-containing protein 2       | SORBS2   | -1.7731 | 2.5503  | 3.7125  | 0.2198 | 0.0634 | 0.0121 |
| Vinexin                                                                   | SORBS3   | 0.0911  | 0.8038  | 0.7273  | 0.9615 | 0.6085 | 0.6567 |
| Sortilin                                                                  | SORT1    | 4.8974  | 2.8502  | -0.5382 | 0.0011 | 0.0393 | 0.7552 |
| Cluster of Isoform 2 of C-Jun-amino-terminal kinase-interacting protein 4 | SPAG9    | 0.5336  | -1.7955 | -2.1267 | 0.7673 | 0.1993 | 0.1389 |
| Isoform 3 of SPATS2-like protein                                          | SPATS2L  | -0.4940 | -1.6790 | -1.3122 | 0.7785 | 0.2298 | 0.3883 |
| Sepiapterin reductase                                                     | SPR      | 2.2072  | 2.6373  | 1.0858  | 0.1191 | 0.0558 | 0.4875 |
| Isoform 2 of Spectrin alpha chain, erythrocytic 1                         | SPTA1    | -3.0591 | -1.9123 | 0.2066  | 0.0308 | 0.1693 | 0.9038 |
| Cluster of Isoform 3 of Spectrin alpha chain, non-erythrocytic 1          | SPTAN1   | -0.2800 | -3.1604 | -2.9127 | 0.8758 | 0.0227 | 0.0415 |
| Cluster of Isoform 2 of Spectrin beta chain, erythrocytic                 | SPTB     | -5.1109 | -1.7901 | 1.7247  | 0.0008 | 0.2003 | 0.2421 |
| Cluster of Spectrin beta chain, non-erythrocytic 1                        | SPTBN1   | -0.9336 | -3.5027 | -2.8034 | 0.5612 | 0.0128 | 0.0497 |
| Sulfide:quinone oxidoreductase, mitochondrial                             | SQOR     | 1.1694  | 0.2687  | -0.5330 | 0.4468 | 0.8680 | 0.7582 |
| Sequestosome-1                                                            | SQSTM1   | 6.1260  | 3.4180  | -0.8177 | 0.0001 | 0.0147 | 0.6202 |
| Isoform 2 of Sorcin                                                       | SRI      | -0.2931 | -4.7328 | -4.4477 | 0.8710 | 0.0017 | 0.0036 |
| Signal recognition particle 14 kDa protein                                | SRP14    | 2.6606  | 7.8589  | 5.9044  | 0.0597 | 0.0000 | 0.0003 |
| Signal recognition particle 9 kDa protein                                 | SRP9     | 0.4535  | 5.9973  | 5.5802  | 0.8004 | 0.0002 | 0.0005 |

|                                                                       |         |         |          |         |        |        |        |
|-----------------------------------------------------------------------|---------|---------|----------|---------|--------|--------|--------|
| Isoform 2 of Serrate RNA effector molecule homolog                    | SRRT    | -0.4827 | -2.1572  | -1.7894 | 0.7863 | 0.1178 | 0.2253 |
| Serine/arginine-rich splicing factor 1                                | SRSF1   | 0.3419  | 0.1926   | -0.0438 | 0.8507 | 0.9040 | 0.9771 |
| Isoform 2 of Serine/arginine-rich splicing factor 10                  | SRSF10  | 1.2890  | 5.8022   | 4.8193  | 0.3933 | 0.0003 | 0.0019 |
| Cluster of Serine/arginine-rich splicing factor 2                     | SRSF2   | 11.5821 | 0.1753   | -7.7197 | 0.0000 | 0.9109 | 0.0000 |
| Serine/arginine-rich splicing factor 3                                | SRSF3   | 1.2596  | 6.1527   | 5.1836  | 0.4057 | 0.0002 | 0.0010 |
| Serine/arginine-rich splicing factor 7                                | SRSF7   | 2.3798  | 0.7404   | -0.8945 | 0.0915 | 0.6452 | 0.5778 |
| Lupus La protein                                                      | SSB     | 3.0111  | -0.7272  | -2.7657 | 0.0334 | 0.6504 | 0.0532 |
| Single-stranded DNA-binding protein, mitochondrial                    | SSBP1   | 11.1479 | 7.4744   | -0.2563 | 0.0000 | 0.0000 | 0.8859 |
| Translocon-associated protein subunit alpha                           | SSR1    | 9.9302  | -1.6038  | -8.3412 | 0.0000 | 0.2549 | 0.0000 |
| Translocon-associated protein subunit delta                           | SSR4    | 0.8481  | 9.8425   | 9.0873  | 0.6097 | 0.0000 | 0.0000 |
| Hsc70-interacting protein                                             | ST13    | -0.1183 | -3.5475  | -3.4030 | 0.9493 | 0.0120 | 0.0194 |
| Signal transducer and activator of transcription 1-alpha/beta         | STAT1   | 2.5277  | 0.3973   | -1.3322 | 0.0724 | 0.8141 | 0.3803 |
| Isoform Del-701 of Signal transducer and activator of transcription 3 | STAT3   | 3.5540  | 2.5314   | 0.0642  | 0.0129 | 0.0655 | 0.9674 |
| Statherin                                                             | STATH   | 15.0103 | 9.5560   | -0.8440 | 0.0000 | 0.0000 | 0.6075 |
| Stromal interaction molecule 1                                        | STIM1   | 2.2268  | 1.2185   | -0.3208 | 0.1160 | 0.4035 | 0.8602 |
| Isoform 2 of Stress-induced-phosphoprotein 1                          | STIP1   | -0.6034 | -1.7787  | -1.3355 | 0.7358 | 0.2032 | 0.3798 |
| Serine/threonine-protein kinase 10                                    | STK10   | -0.2249 | 2.5786   | 2.6854  | 0.9017 | 0.0609 | 0.0595 |
| Serine/threonine-protein kinase 24                                    | STK24   | 2.7913  | 1.0755   | -0.8458 | 0.0479 | 0.4726 | 0.6067 |
| Isoform 2 of Serine/threonine-protein kinase 25                       | STK25   | 0.1337  | 0.2498   | 0.1543  | 0.9439 | 0.8771 | 0.9252 |
| Erythrocyte band 7 integral membrane protein                          | STOM    | 0.4217  | -0.8048  | -1.0776 | 0.8143 | 0.6085 | 0.4902 |
| Stomatin-like protein 2, mitochondrial                                | STOML2  | -0.1154 | 0.7040   | 0.7699  | 0.9493 | 0.6580 | 0.6395 |
| Isoform 2 of Serine-threonine kinase receptor-associated protein      | STRAP   | 1.8630  | 1.5989   | 0.3007  | 0.1951 | 0.2556 | 0.8738 |
| Steryl-sulfatase                                                      | STS     | 5.1647  | 3.2311   | -0.3462 | 0.0007 | 0.0200 | 0.8452 |
| Isoform 2 of Syntaxin-7                                               | STX7    | -0.7267 | -10.5895 | -9.9035 | 0.6759 | 0.0000 | 0.0000 |
| Isoform 2 of Syntaxin-binding protein 1                               | STXBP1  | -1.3150 | 1.4378   | 2.3080  | 0.3825 | 0.3134 | 0.1048 |
| Activated RNA polymerase II transcriptional coactivator p15           | SUB1    | 0.9975  | -2.4204  | -3.0565 | 0.5324 | 0.0789 | 0.0331 |
| Succinate--CoA ligase [GDP-forming] subunit beta, mitochondrial       | SUCLG2  | -1.0331 | -3.1649  | -2.4040 | 0.5162 | 0.0225 | 0.0913 |
| Cluster of Sulfotransferase 1A1                                       | SULT1A1 | -0.4097 | -6.2911  | -5.8985 | 0.8205 | 0.0001 | 0.0003 |

|                                                                             |         |         |         |         |        |        |        |
|-----------------------------------------------------------------------------|---------|---------|---------|---------|--------|--------|--------|
| Cluster of Isoform 5 of SUN domain-containing protein 1                     | SUN1    | 1.8731  | 0.8154  | -0.4755 | 0.1926 | 0.6051 | 0.7812 |
| Isoform 2 of SUN domain-containing protein 2                                | SUN2    | -0.0698 | -1.4652 | -1.3913 | 0.9677 | 0.3048 | 0.3586 |
| Isoform 2 of Heterogeneous nuclear ribonucleoprotein Q                      | SYNCRIP | 0.5250  | 3.0157  | 2.6036  | 0.7697 | 0.0291 | 0.0677 |
| Nesprin-1                                                                   | SYNE1   | -0.7545 | -0.2728 | 0.2462  | 0.6608 | 0.8663 | 0.8888 |
| Isoform 2 of Nesprin-2                                                      | SYNE2   | -1.6544 | -1.2247 | -0.0753 | 0.2600 | 0.4012 | 0.9633 |
| Cluster of Isoform 2 of Synaptopodin                                        | SYNPO   | -2.9756 | -3.2646 | -1.1782 | 0.0352 | 0.0191 | 0.4488 |
| Cluster of Synaptopodin-2                                                   | SYNPO2  | 0.0090  | 0.0199  | 0.0134  | 0.9972 | 0.9880 | 0.9917 |
| Isoform Short of TATA-binding protein-associated factor 2N                  | TAF15   | 8.3824  | -0.1069 | -5.8166 | 0.0000 | 0.9467 | 0.0004 |
| Transgelin                                                                  | TAGLN   | -1.2263 | 0.9213  | 1.7403  | 0.4218 | 0.5484 | 0.2367 |
| Isoform 2 of Transgelin-2                                                   | TAGLN2  | -1.0022 | -0.2143 | 0.4725  | 0.5306 | 0.8938 | 0.7818 |
| Transaldolase                                                               | TALDO1  | 0.1512  | -2.1942 | -2.2577 | 0.9388 | 0.1118 | 0.1146 |
| Antigen peptide transporter 1                                               | TAP1    | 4.7973  | 8.1919  | 4.7755  | 0.0014 | 0.0000 | 0.0020 |
| Cluster of TAR DNA-binding protein 43                                       | TARDBP  | 2.9694  | 0.7021  | -1.3338 | 0.0356 | 0.6583 | 0.3798 |
| Isoform 2 of Threonine--tRNA ligase 1, cytoplasmic                          | TARS1   | 1.4240  | 0.3172  | -0.6588 | 0.3382 | 0.8460 | 0.6912 |
| Tax1-binding protein 3                                                      | TAX1BP3 | 11.7836 | 6.5926  | -1.5554 | 0.0000 | 0.0001 | 0.2975 |
| Isoform 2 of TBC1 domain family member 9B                                   | TBC1D9B | -0.3189 | 0.5406  | 0.7481  | 0.8624 | 0.7418 | 0.6470 |
| Tubulin-specific chaperone A                                                | TBCA    | 15.1820 | 9.0223  | -1.4851 | 0.0000 | 0.0000 | 0.3234 |
| T-complex protein 1 subunit alpha                                           | TCP1    | 0.8036  | -2.4761 | -2.9790 | 0.6339 | 0.0716 | 0.0381 |
| Isoform 2 of Angiopoietin-1 receptor                                        | TEK     | 5.5414  | 3.7576  | -0.0859 | 0.0004 | 0.0086 | 0.9607 |
| Methylcytosine dioxygenase TET1                                             | TET1    | 2.5840  | 1.7108  | -0.0808 | 0.0672 | 0.2206 | 0.9633 |
| Serotransferrin                                                             | TF      | 1.7799  | -2.3493 | -3.5198 | 0.2182 | 0.0882 | 0.0166 |
| Isoform 2 of Transforming growth factor beta-1-induced transcript 1 protein | TGFB111 | -1.9532 | -1.1326 | 0.2186  | 0.1735 | 0.4445 | 0.9013 |
| Transforming growth factor-beta-induced protein ig-h3                       | TGFBI   | 0.6641  | -0.7246 | -1.1641 | 0.7032 | 0.6504 | 0.4526 |
| Protein-glutamine gamma-glutamyltransferase 2                               | TGM2    | 2.4190  | 2.3812  | 0.6900  | 0.0866 | 0.0837 | 0.6726 |
| Protein-glutamine gamma-glutamyltransferase E                               | TGM3    | 2.4639  | 3.0771  | 1.3428  | 0.0802 | 0.0261 | 0.3775 |
| Thrombospondin-1                                                            | THBS1   | 1.0717  | -0.5957 | -1.3153 | 0.4988 | 0.7109 | 0.3870 |
| Thrombospondin type-1 domain-containing protein 7A                          | THSD7A  | -3.8943 | -1.4686 | 1.2113  | 0.0070 | 0.3035 | 0.4332 |
| Tubulointerstitial nephritis antigen                                        | TINAG   | -0.5970 | -5.3601 | -4.8568 | 0.7381 | 0.0006 | 0.0018 |
| Cluster of Tubulointerstitial nephritis antigen-like                        | TINAGL1 | 0.3177  | 0.9971  | 0.7627  | 0.8624 | 0.5097 | 0.6422 |
| Cluster of Tight junction protein ZO-1                                      | TJP1    | -3.2181 | -4.2185 | -1.9497 | 0.0234 | 0.0039 | 0.1817 |
| Triokinase/FMN cyclase                                                      | TKFC    | -4.9617 | -1.9655 | 1.4508  | 0.0010 | 0.1569 | 0.3347 |
| Isoform 2 of Transketolase                                                  | TKT     | 1.0478  | -1.0703 | -1.7650 | 0.5102 | 0.4739 | 0.2305 |

|                                                                 |          |          |          |         |        |        |        |
|-----------------------------------------------------------------|----------|----------|----------|---------|--------|--------|--------|
| Cluster of Talin-1                                              | TLN1     | -0.7321  | -1.7787  | -1.2478 | 0.6728 | 0.2032 | 0.4181 |
| Transmembrane emp24 domain-containing protein 2                 | TMED2    | 9.8907   | 6.1835   | -0.6673 | 0.0000 | 0.0002 | 0.6868 |
| Stimulator of interferon genes protein                          | TMEM173  | 4.5409   | 2.7734   | -0.3707 | 0.0021 | 0.0449 | 0.8357 |
| Transmembrane protein 43                                        | TMEM43   | 10.9681  | 6.9765   | -0.6228 | 0.0000 | 0.0001 | 0.7114 |
| Tropomodulin-1                                                  | TMOD1    | 0.2501   | 4.3571   | 4.1082  | 0.8898 | 0.0031 | 0.0062 |
| Tropomodulin-3                                                  | TMOD3    | -1.3153  | -3.4557  | -2.4972 | 0.3825 | 0.0137 | 0.0786 |
| Cluster of Lamina-associated polypeptide 2, isoforms beta/gamma | TMPO     | 8.0226   | 5.2087   | -0.3516 | 0.0000 | 0.0007 | 0.8445 |
| Thymosin beta-4                                                 | TMSB4X   | 0.2604   | -1.8208  | -1.9654 | 0.8852 | 0.1938 | 0.1775 |
| Cluster of Isoform 4 of Tenascin                                | TNC      | 1.9606   | 0.9601   | -0.3931 | 0.1721 | 0.5291 | 0.8256 |
| 182 kDa tankyrase-1-binding protein                             | TNKS1BP1 | -1.2581  | -1.7288  | -0.8404 | 0.4057 | 0.2150 | 0.6085 |
| Tensin-1                                                        | TNS1     | -0.0865  | -1.0650  | -0.9869 | 0.9632 | 0.4755 | 0.5268 |
| Isoform 4 of Tensin-2                                           | TNS2     | -1.0641  | -4.3669  | -3.5631 | 0.5027 | 0.0031 | 0.0156 |
| Tensin-3                                                        | TNS3     | -0.6989  | -2.7039  | -2.1790 | 0.6868 | 0.0500 | 0.1284 |
| Toll-interacting protein                                        | TOLLIP   | 7.0962   | 4.2473   | -0.6645 | 0.0000 | 0.0037 | 0.6881 |
| Isoform 5 of TOM1-like protein 2                                | TOM1L2   | -3.3703  | -3.2195  | -0.8650 | 0.0179 | 0.0204 | 0.5978 |
| Isoform 3 of Torsin-1A-interacting protein 1                    | TOR1AIP1 | 1.7905   | 2.7193   | 1.4502  | 0.2158 | 0.0486 | 0.3347 |
| Isoform 3 of Tumor protein D52                                  | TPD52    | -2.3309  | 5.9951   | 7.4754  | 0.0989 | 0.0002 | 0.0000 |
| Isoform 2 of Triosephosphate isomerase                          | TPI1     | 1.5625   | -2.1943  | -3.2195 | 0.2896 | 0.1118 | 0.0259 |
| Isoform 5 of Tropomyosin alpha-1 chain                          | TPM1     | 0.1365   | -1.0031  | -1.0781 | 0.9430 | 0.5063 | 0.4902 |
| Cluster of Isoform 2 of Tropomyosin alpha-3 chain               | TPM3     | -0.0457  | -0.6514  | -0.6085 | 0.9751 | 0.6880 | 0.7193 |
| Tripeptidyl-peptidase 1                                         | TPP1     | 0.1937   | -0.7612  | -0.8794 | 0.9192 | 0.6348 | 0.5883 |
| Tubulin polymerization-promoting protein family member 3        | TPPP3    | -17.4048 | -12.8974 | -0.8056 | 0.0000 | 0.0000 | 0.6255 |
| Nucleoprotein TPR                                               | TPR      | -1.4924  | 1.0441   | 2.0422  | 0.3158 | 0.4857 | 0.1578 |
| Transformer-2 protein homolog alpha                             | TRA2A    | 10.2794  | 6.0201   | -1.0926 | 0.0000 | 0.0002 | 0.4839 |
| Isoform 3 of Transformer-2 protein homolog beta                 | TRA2B    | 0.5805   | -0.6018  | -0.9865 | 0.7438 | 0.7089 | 0.5268 |
| Isoform Beta of E3 ubiquitin-protein ligase TRIM23              | TRIM23   | 7.2391   | 3.3658   | -1.6274 | 0.0000 | 0.0160 | 0.2744 |
| E3 ubiquitin/ISG15 ligase TRIM25                                | TRIM25   | 3.0948   | 1.6368   | -0.5014 | 0.0289 | 0.2440 | 0.7734 |
| Transcription intermediary factor 1-beta                        | TRIM28   | 0.6719   | -1.1352  | -1.5726 | 0.7017 | 0.4435 | 0.2922 |
| TSC22 domain family protein 1                                   | TSC22D1  | 9.1469   | -0.5675  | -6.7898 | 0.0000 | 0.7246 | 0.0001 |
| Thiosulfate sulfurtransferase                                   | TST      | 12.7779  | 8.7206   | -0.1433 | 0.0000 | 0.0000 | 0.9298 |
| Transthyretin                                                   | TTR      | 4.8502   | 0.3711   | -2.9404 | 0.0012 | 0.8259 | 0.0401 |
| Cluster of Tubulin alpha-1B chain                               | TUBA1B   | 0.5730   | -2.0419  | -2.3956 | 0.7463 | 0.1380 | 0.0926 |
| Cluster of Tubulin beta chain                                   | TUBB     | 0.0784   | -1.7633  | -1.7849 | 0.9647 | 0.2069 | 0.2255 |
| Elongation factor Tu, mitochondrial                             | TUFM     | -0.4158  | 2.1495   | 2.3941  | 0.8183 | 0.1189 | 0.0926 |

|                                                                             |         |          |          |         |        |        |        |
|-----------------------------------------------------------------------------|---------|----------|----------|---------|--------|--------|--------|
| Isoform 4 of Twinfilin-1                                                    | TWF1    | -2.9682  | 3.7117   | 5.6673  | 0.0356 | 0.0092 | 0.0005 |
| Twinfilin-2                                                                 | TWF2    | 2.5664   | 1.5994   | -0.1781 | 0.0685 | 0.2556 | 0.9180 |
| Thioredoxin                                                                 | TXN     | 0.3017   | -3.8309  | -3.9674 | 0.8708 | 0.0076 | 0.0078 |
| Thioredoxin domain-containing protein 17                                    | TXNDC17 | 0.5311   | -0.1370  | -0.4965 | 0.7673 | 0.9286 | 0.7743 |
| Isoform 2 of Thioredoxin domain-containing protein 5                        | TXNDC5  | -7.9683  | -0.4313  | 5.0060  | 0.0000 | 0.7991 | 0.0014 |
| Thioredoxin-like protein 1                                                  | TXNL1   | 6.3709   | 0.3240   | -4.0229 | 0.0001 | 0.8449 | 0.0071 |
| Cluster of Thioredoxin reductase 1, cytoplasmic                             | TXNRD1  | -5.8755  | -0.2709  | 3.7375  | 0.0002 | 0.8669 | 0.0116 |
| Isoform 2 of Thymidine phosphorylase                                        | TYMP    | 1.8199   | 1.2493   | -0.0133 | 0.2083 | 0.3914 | 0.9917 |
| Tyrosine-protein kinase receptor TYRO3                                      | TYRO3   | -3.7344  | -0.2617  | 2.2876  | 0.0093 | 0.8711 | 0.1084 |
| Isoform 2 of Splicing factor U2AF 65 kDa subunit                            | U2AF2   | -2.6268  | 4.0295   | 5.7468  | 0.0627 | 0.0054 | 0.0004 |
| Isoform 2 of Uveal autoantigen with coiled-coil domains and ankyrin repeats | UACA    | 1.1954   | -0.4326  | -1.2393 | 0.4361 | 0.7991 | 0.4209 |
| Ubiquitin-like modifier-activating enzyme 1                                 | UBA1    | 1.8033   | -2.4075  | -3.5929 | 0.2130 | 0.0804 | 0.0149 |
| Isoform 2 of Ubiquitin-associated protein 2-like                            | UBAP2L  | 3.2235   | 1.7826   | -0.4459 | 0.0232 | 0.2023 | 0.7961 |
| Isoform 2 of Ubiquitin-conjugating enzyme E2 K                              | UBE2K   | 4.2460   | 2.3198   | -0.6152 | 0.0037 | 0.0920 | 0.7150 |
| Cluster of Isoform 3 of Ubiquitin-conjugating enzyme E2 L3                  | UBE2L3  | -8.9207  | -8.2456  | -2.0186 | 0.0000 | 0.0000 | 0.1630 |
| Ubiquitin-conjugating enzyme E2 N                                           | UBE2N   | -1.0065  | -3.5037  | -2.7548 | 0.5280 | 0.0128 | 0.0542 |
| Cluster of Ubiquilin-4                                                      | UBQLN4  | -11.5393 | -2.4615  | 5.4455  | 0.0000 | 0.0735 | 0.0007 |
| Isoform 2 of UBX domain-containing protein 1                                | UBXN1   | 6.7558   | 3.4572   | -1.2084 | 0.0000 | 0.0137 | 0.4346 |
| Ubiquitin carboxyl-terminal hydrolase isozyme L1                            | UCHL1   | 10.1611  | 6.5563   | -0.4855 | 0.0000 | 0.0001 | 0.7795 |
| Isoform 2 of E3 UFM1-protein ligase 1                                       | UFL1    | -2.5639  | -0.2470  | 1.5045  | 0.0685 | 0.8785 | 0.3157 |
| Ubiquitin-fold modifier 1                                                   | UFM1    | -1.6475  | -11.7516 | 10.4173 | 0.2614 | 0.0000 | 0.0000 |
| UDP-glucose 6-dehydrogenase                                                 | UGDH    | 6.4837   | 3.2360   | -1.2402 | 0.0001 | 0.0199 | 0.4209 |
| Isoform 2 of UDP-glucose:glycoprotein glucosyltransferase 1                 | UGGT1   | 0.7535   | 1.5604   | 1.0189  | 0.6609 | 0.2673 | 0.5159 |
| Isoform 2 of UTP--glucose-1-phosphate uridylyltransferase                   | UGP2    | -6.7496  | -0.0774  | 4.5231  | 0.0000 | 0.9575 | 0.0032 |
| Cluster of UDP-glucuronosyltransferase 2B7                                  | UGT2B7  | -11.9495 | 0.2320   | 8.3700  | 0.0000 | 0.8861 | 0.0000 |
| Isoform 4 of Uromodulin                                                     | UMOD    | 14.5006  | 9.4147   | -0.6354 | 0.0000 | 0.0000 | 0.7047 |
| Protein unc-45 homolog A                                                    | UNC45A  | 0.1479   | -1.2874  | -1.3650 | 0.9399 | 0.3772 | 0.3669 |
| Cytochrome b-c1 complex subunit 1, mitochondrial                            | UQCRC1  | 0.3174   | 0.4994   | 0.2741  | 0.8624 | 0.7672 | 0.8827 |
| Cytochrome b-c1 complex subunit 2, mitochondrial                            | UQCRC2  | -0.3931  | -0.2451  | 0.0272  | 0.8252 | 0.8794 | 0.9864 |

|                                                                     |         |          |         |         |        |        |        |
|---------------------------------------------------------------------|---------|----------|---------|---------|--------|--------|--------|
| Isoform 2 of General vesicular transport factor p115                | USO1    | 1.9509   | -0.2087 | -1.5342 | 0.1736 | 0.8954 | 0.3064 |
| Ubiquitin carboxyl-terminal hydrolase 14                            | USP14   | -1.2200  | 0.2055  | 1.0330  | 0.4248 | 0.8969 | 0.5094 |
| Isoform Short of Ubiquitin carboxyl-terminal hydrolase 5            | USP5    | -1.0444  | -0.8991 | -0.1712 | 0.5121 | 0.5581 | 0.9223 |
| Isoform 2 of Probable ubiquitin carboxyl-terminal hydrolase FAF-X   | USP9X   | 0.0386   | 0.1325  | 0.1038  | 0.9788 | 0.9309 | 0.9527 |
| Isoform 2 of Utrophin                                               | UTRN    | -0.8331  | -3.6814 | -3.0475 | 0.6182 | 0.0097 | 0.0335 |
| Cluster of Vesicle-associated membrane protein 3                    | VAMP3   | -2.7228  | 17.4890 | 19.0291 | 0.0536 | 0.0000 | 0.0000 |
| Valine--tRNA ligase                                                 | VARS    | 1.4077   | -0.6151 | -1.5632 | 0.3444 | 0.7052 | 0.2941 |
| Vasorin                                                             | VASN    | 0.1679   | -2.6270 | -2.6941 | 0.9306 | 0.0566 | 0.0586 |
| Vasodilator-stimulated phosphoprotein                               | VASP    | 9.2910   | 5.1940  | -1.2303 | 0.0000 | 0.0008 | 0.4244 |
| Synaptic vesicle membrane protein VAT-1 homolog                     | VAT1    | 2.0787   | 0.3102  | -1.1117 | 0.1447 | 0.8505 | 0.4758 |
| Cluster of Isoform 1 of Vinculin                                    | VCL     | -1.2180  | -2.0967 | -1.2289 | 0.4256 | 0.1273 | 0.4244 |
| Transitional endoplasmic reticulum ATPase                           | VCP     | -0.0472  | -2.1896 | -2.1180 | 0.9748 | 0.1126 | 0.1407 |
| Voltage-dependent anion-selective channel protein 1                 | VDAC1   | 2.4081   | -0.5597 | -2.1905 | 0.0881 | 0.7291 | 0.1271 |
| Isoform 1 of Voltage-dependent anion-selective channel protein 2    | VDAC2   | 0.6694   | -3.1003 | -3.5006 | 0.7031 | 0.0251 | 0.0171 |
| Cluster of Vimentin                                                 | VIM     | -0.7016  | -1.9199 | -1.4073 | 0.6868 | 0.1677 | 0.3533 |
| Vacuolar protein sorting-associated protein 26B                     | VPS26B  | 3.6097   | 2.1423  | -0.3559 | 0.0118 | 0.1199 | 0.8423 |
| Vacuolar protein sorting-associated protein 35                      | VPS35   | -0.3956  | 0.4286  | 0.6905  | 0.8251 | 0.7991 | 0.6726 |
| Isoform 2 of Vacuolar protein sorting-associated protein 52 homolog | VPS52   | 0.6212   | -1.0513 | -1.4556 | 0.7284 | 0.4823 | 0.3336 |
| Vitronectin                                                         | VTN     | 1.0914   | 0.9748  | 0.2136  | 0.4868 | 0.5222 | 0.9027 |
| von Willebrand factor A domain-containing protein 1                 | VWA1    | 1.1862   | -2.0900 | -2.8606 | 0.4400 | 0.1282 | 0.0448 |
| von Willebrand factor                                               | VWF     | -2.9410  | 0.2189  | 2.2189  | 0.0374 | 0.8920 | 0.1221 |
| Tryptophan--tRNA ligase, cytoplasmic                                | WARS    | 0.8191   | -1.9624 | -2.4851 | 0.6243 | 0.1575 | 0.0802 |
| Wiskott-Aldrich syndrome protein family member 2                    | WASF2   | -0.6570  | 0.9592  | 1.3895  | 0.7075 | 0.5291 | 0.3588 |
| WD repeat-containing protein 1                                      | WDR1    | 0.1087   | -1.1662 | -1.2193 | 0.9526 | 0.4280 | 0.4291 |
| Skin-specific protein 32                                            | XP32    | -20.8516 | -0.2834 | 13.9296 | 0.0000 | 0.8619 | 0.0000 |
| Isoform 3 of Xaa-Pro aminopeptidase 1                               | XPNPEP1 | -0.7765  | -4.7186 | -4.1044 | 0.6479 | 0.0017 | 0.0062 |
| Exportin-7                                                          | XPO7    | 0.6469   | 1.2841  | 0.8201  | 0.7119 | 0.3779 | 0.6196 |
| X-ray repair cross-complementing protein 5                          | XRCC5   | 1.7141   | 0.3922  | -0.7828 | 0.2388 | 0.8170 | 0.6349 |
| X-ray repair cross-complementing protein 6                          | XRCC6   | 2.4830   | -0.6267 | -2.3072 | 0.0782 | 0.7002 | 0.1048 |
| Y-box-binding protein 1                                             | YBX1    | 0.4901   | 0.7032  | 0.3566  | 0.7811 | 0.6580 | 0.8423 |
| Y-box-binding protein 2                                             | YBX2    | -13.0370 | -9.0817 | -0.0348 | 0.0000 | 0.0000 | 0.9811 |

|                                                 |        |         |         |         |        |        |        |
|-------------------------------------------------|--------|---------|---------|---------|--------|--------|--------|
| Isoform 2 of Y-box-binding protein 3            | YBX3   | -1.0402 | 8.5390  | 9.0938  | 0.5122 | 0.0000 | 0.0000 |
| Isoform 1 of YLP motif-containing protein 1     | YLPM1  | -0.5958 | -1.2847 | -0.8556 | 0.7383 | 0.3779 | 0.6021 |
| Isoform Short of 14-3-3 protein beta/alpha      | YWHAB  | 2.2573  | -1.9701 | -3.4727 | 0.1101 | 0.1560 | 0.0178 |
| 14-3-3 protein epsilon                          | YWHAE  | 1.5628  | -2.4868 | -3.5068 | 0.2896 | 0.0704 | 0.0169 |
| 14-3-3 protein gamma                            | YWHAG  | 0.8059  | -2.5900 | -3.0925 | 0.6330 | 0.0600 | 0.0312 |
| 14-3-3 protein eta                              | YWHAH  | 2.6409  | -0.6005 | -2.3892 | 0.0615 | 0.7089 | 0.0931 |
| 14-3-3 protein theta                            | YWHAQ  | 1.8926  | -0.0927 | -1.3806 | 0.1894 | 0.9509 | 0.3607 |
| 14-3-3 protein zeta/delta                       | YWHAZ  | 1.6287  | -2.0463 | -3.1192 | 0.2684 | 0.1373 | 0.0301 |
| Zymogen granule protein 16 homolog B            | ZG16B  | 12.8997 | 9.1917  | 0.2365  | 0.0000 | 0.0000 | 0.8948 |
| Cluster of Isoform 6 of Zinc finger protein 185 | ZNF185 | -3.3623 | -1.4401 | 0.8768  | 0.0182 | 0.3130 | 0.5897 |
| Zyxin                                           | ZYX    | -0.1939 | -0.7790 | -0.6329 | 0.9192 | 0.6253 | 0.7062 |



| <b>Supplemental Table 2. Gene Names of Glomerular ECM Proteins Identified in NC, FSGS-NOS, and cFSGS</b> |         |          |
|----------------------------------------------------------------------------------------------------------|---------|----------|
| Normal                                                                                                   | cFSGS   | FSGS-NOS |
| A2M                                                                                                      | A2M     | A2M      |
| AGRN                                                                                                     | AGRN    | AGRN     |
| AGT                                                                                                      | AGT     | AGT      |
| ALB                                                                                                      | ALB     | ALB      |
| AMBP                                                                                                     | AMBP    | AMBP     |
| ANGPTL6                                                                                                  | ANGPTL6 | ANGPTL6  |
| ANXA1                                                                                                    | ANXA1   | ANXA1    |
| ANXA11                                                                                                   | ANXA11  | ANXA11   |
| ANXA2                                                                                                    | ANXA2   | ANXA2    |
| ANXA4                                                                                                    | ANXA3   | ANXA4    |
| ANXA5                                                                                                    | ANXA4   | ANXA5    |
| ANXA6                                                                                                    | ANXA5   | ANXA6    |
| APCS                                                                                                     | ANXA6   | ANXA7    |
| APOA1                                                                                                    | ANXA7   | APCS     |
| APOA4                                                                                                    | APCS    | APOA1    |
| APOE                                                                                                     | APOA1   | APOA4    |
| C1QA                                                                                                     | APOA4   | APOE     |
| C1QB                                                                                                     | APOC3   | BGN      |
| C1QC                                                                                                     | APOE    | C1QA     |
| C3                                                                                                       | AZU1    | C1QB     |
| C5                                                                                                       | C1QA    | C1QC     |
| C6                                                                                                       | C1QB    | C3       |
| C7                                                                                                       | C1QC    | C5       |
| C8A                                                                                                      | C3      | C6       |
| C8G                                                                                                      | C5      | C7       |
| C9                                                                                                       | C6      | C8A      |
| CFHR5                                                                                                    | C7      | C8B      |
| CLU                                                                                                      | C8A     | C8G      |
| COL18A1                                                                                                  | C8B     | C9       |
| COL1A1                                                                                                   | C8G     | CFHR5    |
| COL1A2                                                                                                   | C9      | CLU      |
| COL3A1                                                                                                   | CFHR5   | COL12A1  |
| COL4A1                                                                                                   | CLU     | COL15A1  |
| COL4A2                                                                                                   | COL12A1 | COL18A1  |
| COL4A3                                                                                                   | COL15A1 | COL1A1   |
| COL4A4                                                                                                   | COL18A1 | COL1A2   |
| COL4A5                                                                                                   | COL1A1  | COL2A1   |
| COL6A1                                                                                                   | COL1A2  | COL3A1   |

|          |         |          |
|----------|---------|----------|
| COL6A2   | COL2A1  | COL4A1   |
| COL6A3   | COL3A1  | COL4A2   |
| COPA     | COL4A1  | COL4A3   |
| CSTB     | COL4A2  | COL4A4   |
| CTSD     | COL4A3  | COL4A5   |
| CTSZ     | COL4A4  | COL6A1   |
| EMILIN1  | COL4A5  | COL6A2   |
| F2       | COL6A1  | COL6A3   |
| F9       | COL6A2  | COL7A1   |
| FBLN1    | COL6A3  | COPA     |
| FBN1     | COL7A1  | CSTA     |
| FGA      | COPA    | CSTB     |
| FGB      | CRIM1   | CTSD     |
| FGF1     | CSPG4   | CTSZ     |
| FGG      | CSTA    | DCD      |
| FN1      | CSTB    | DST      |
| GNAS     | CTSC    | EFEMP1   |
| GPI      | CTSD    | EMILIN1  |
| GPX3     | CTSG    | F2       |
| GSN      | CTSZ    | F9       |
| HP       | DCD     | FBLN1    |
| HPX      | ECM1    | FBLN5    |
| HRG      | EFEMP1  | FBN1     |
| HRNR     | ELANE   | FGA      |
| HSD17B12 | EMILIN1 | FGB      |
| HSPG2    | F12     | FGF1     |
| IGHG4    | F2      | FGG      |
| ITIH1    | F9      | FLG2     |
| ITIH2    | FBLN1   | FN1      |
| ITIH4    | FBLN5   | GNAS     |
| LAMA2    | FBN1    | GPI      |
| LAMA5    | FBN2    | GPX3     |
| LAMB1    | FGA     | GSN      |
| LAMB2    | FGB     | HP       |
| LAMC1    | FGF1    | HPX      |
| LGALS1   | FGG     | HRG      |
| LGALS3BP | FLG2    | HRNR     |
| LUM      | FN1     | HSD17B12 |
| LYZ      | GNAS    | HSPG2    |
| MMRN2    | GPI     | HTRA1    |
| MPO      | GPX3    | IGHG4    |
| NID1     | GSN     | ITIH1    |
| NID2     | HP      | ITIH2    |

|           |          |           |
|-----------|----------|-----------|
| NPNT      | HPX      | ITIH4     |
| PAPLN     | HRG      | LAMA2     |
| PEBP1     | HRNR     | LAMA5     |
| PLG       | HSD17B12 | LAMB1     |
| POSTN     | HSPG2    | LAMB2     |
| PPIA      | IGFALS   | LAMC1     |
| RBP4      | IGFBP7   | LGALS1    |
| S100A11   | IGHG4    | LGALS3BP  |
| SBSPON    | ITIH1    | LPA       |
| SERPINA1  | ITIH2    | LRG1      |
| SERPINA3  | ITIH4    | LRP2      |
| SERPINB1  | ITIH5    | LUM       |
| SERPINB12 | KNG1     | LYZ       |
| SERPINB6  | LAMA2    | MFGE8     |
| SERPINC1  | LAMA4    | MMRN2     |
| SERPINF1  | LAMA5    | MPO       |
| SERPINF2  | LAMB1    | NID1      |
| SERPINH1  | LAMB2    | NID2      |
| TGFBI     | LAMC1    | NPNT      |
| TGM2      | LGALS1   | NTN4      |
| THBS1     | LGALS3   | PAPLN     |
| TINAG     | LGALS3BP | PEBP1     |
| TINAGL1   | LGALS7   | PLG       |
| TNC       | LMAN1    | POSTN     |
| TTR       | LPA      | PPIA      |
| VTN       | LRG1     | PRG2      |
| VWA1      | LUM      | PXDN      |
| VWF       | LYZ      | RBP4      |
|           | MFGE8    | S100A11   |
|           | MMRN2    | S100A16   |
|           | MPO      | S100A8    |
|           | NID1     | SAA1      |
|           | NID2     | SBSPON    |
|           | NPNT     | SERPINA1  |
|           | PAPLN    | SERPINA3  |
|           | PEBP1    | SERPINB1  |
|           | PLG      | SERPINB12 |
|           | PLOD3    | SERPINB6  |
|           | POSTN    | SERPINC1  |
|           | PPIA     | SERPINF1  |
|           | PRG2     | SERPINF2  |
|           | PRG3     | SERPING1  |
|           | PRSS23   | SERPINH1  |

|  |           |         |
|--|-----------|---------|
|  | PXDN      | TGFBI   |
|  | RBP4      | TGM2    |
|  | S100A11   | TGM3    |
|  | S100A16   | THBS1   |
|  | S100A8    | TINAG   |
|  | S100A9    | TINAGL1 |
|  | SBSPON    | TNC     |
|  | SERPINA1  | TTR     |
|  | SERPINA3  | VTN     |
|  | SERPINB1  | VWA1    |
|  | SERPINB12 | VWF     |
|  | SERPINB6  |         |
|  | SERPINC1  |         |
|  | SERPIND1  |         |
|  | SERPINF1  |         |
|  | SERPINF2  |         |
|  | SERPING1  |         |
|  | SERPINH1  |         |
|  | TGFBI     |         |
|  | TGM2      |         |
|  | TGM3      |         |
|  | THBS1     |         |
|  | TINAG     |         |
|  | TINAGL1   |         |
|  | TNC       |         |
|  | TTR       |         |
|  | VTN       |         |
|  | UMOD      |         |
|  | VWA1      |         |
|  | VWF       |         |

| <b>Supplemental Table 3. Relative Abundance of Glomerular ECM Proteins</b> |         |                    |                       |        |                     |        |
|----------------------------------------------------------------------------|---------|--------------------|-----------------------|--------|---------------------|--------|
| <b>Core Basement Membrane Matrisome</b>                                    |         |                    |                       |        |                     |        |
| Protein                                                                    | Gene    | Matrisome Category | Fold change cFSGS: NC | log2FC | Fold change NOS: NC | Log2FC |
| Collagen alpha-1(XV)                                                       | COL15A1 | Collagens          | >10                   | >4.0   | >10                 | >4.0   |
| Collagen alpha-1(XVIII)                                                    | COL18A1 | Collagens          | 1.8                   | 0.8    | 1.5                 | 0.58   |
| Collagen alpha-1(II)                                                       | COL2A1  | Collagens          | >10                   | >4.0   | >10                 | >4.0   |
| Collagen alpha-1 (III)                                                     | COL3A1  | Collagens          | 1.8                   | 0.8    | 5.3                 | 2.41   |
| Collagen alpha-1 (IV)                                                      | COL4A1  | Collagens          | 1.0                   | 0.0    | 1.8                 | 0.85   |
| Collagen alpha-2 (IV)                                                      | COL4A2  | Collagens          | 1.4                   | 0.5    | 2.4                 | 1.26   |
| Collagen alpha-3 (IV)                                                      | COL4A3  | Collagens          | 1.4                   | 0.5    | 1.4                 | 0.49   |
| Collagen alpha-4 (IV)                                                      | COL4A4  | Collagens          | 1.3                   | 0.4    | 1.1                 | 0.14   |
| Collagen alpha-5 (IV)                                                      | COL4A5  | Collagens          | 1.0                   | 0.0    | 0.8                 | 0.32   |
| Collagen alpha-1 (VII)                                                     | COL7A1  | Collagens          | >10                   | >4.0   | >10                 | >4.0   |
| Agrin                                                                      | AGRN    | ECM Glycoproteins  | 1.2                   | 0.3    | 1.2                 | 0.26   |
| EGF-containing fibulin-like extracellular matrix protein 1                 | EFEMP1  | ECM Glycoproteins  | >10                   | >4.0   | >10                 | >4.0   |
| Fibulin-1                                                                  | FBLN1   | ECM Glycoproteins  | 0.8                   | -0.3   | 1.5                 | 0.58   |
| Fibrillin-1                                                                | FBN1    | ECM Glycoproteins  | 0.8                   | -0.3   | 0.8                 | 0.32   |
| Fibronectin                                                                | FN1     | ECM Glycoproteins  | 1.6                   | 0.7    | 1.5                 | 0.58   |
| Laminin subunit alpha-2                                                    | LAMA2   | ECM Glycoproteins  | 5.3                   | 2.4    | 0.6                 | 0.74   |
| Laminin subunit alpha-4                                                    | LAMA4   | ECM Glycoproteins  | >10                   | >4.0   | 1.0                 | 0.00   |
| Laminin subunit alpha-5                                                    | LAMA5   | ECM Glycoproteins  | 1.0                   | 0.0    | 0.9                 | 0.15   |
| Laminin subunit beta-1                                                     | LAMB1   | ECM Glycoproteins  | 3.6                   | 1.8    | 1.0                 | 0.00   |
| Laminin subunit beta-2                                                     | LAMB2   | ECM Glycoproteins  | 1.1                   | 0.1    | 1.1                 | 0.14   |

|                                                                      |         |                   |     |      |     |      |
|----------------------------------------------------------------------|---------|-------------------|-----|------|-----|------|
| Laminin subunit gamma-1                                              | LAMC1   | ECM Glycoproteins | 1.2 | 0.3  | 1.0 | 0.00 |
| Multimerin-2                                                         | MMRN2   | ECM Glycoproteins | 0.4 | -1.3 | 0.4 | 1.30 |
| Nidogen-1                                                            | NID1    | ECM Glycoproteins | 1.1 | 0.1  | 1.1 | 0.14 |
| Nidogen-2                                                            | NID2    | ECM Glycoproteins | 1.0 | 0.0  | 1.0 | 0.00 |
| Nephronectin                                                         | NPNT    | ECM Glycoproteins | 1.1 | 0.1  | 2.4 | 1.26 |
| Netrin-4                                                             | NTN4    | ECM Glycoproteins | 1.0 | 0.0  | 1.0 | 0.00 |
| Papilin                                                              | PAPLN   | ECM Glycoproteins | 0.5 | -1.0 | 0.9 | 0.15 |
| Transforming growth factor-beta-induced protein ig-h3                | TGFBI   | ECM Glycoproteins | 0.8 | -0.3 | 0.8 | 0.32 |
| Tenascin                                                             | TNC     | ECM Glycoproteins | 2.6 | 1.4  | 1.6 | 0.68 |
| von Willebrand factor A domain-containing protein 1                  | VWA1    | ECM Glycoproteins | 0.8 | -0.3 | 0.8 | 0.32 |
| Basement membrane-specific heparan sulfate proteoglycan core protein | HSPG2   | Proteoglycans     | 1.0 | 0.0  | 1.0 | 0.00 |
|                                                                      |         |                   |     |      |     |      |
| <b>Core Structural Matrisome</b>                                     |         |                   |     |      |     |      |
| Collagen alpha-1 (XII)                                               | COL12A1 | Collagens         | >10 | >4.0 | >10 | >4.0 |
| Collagen alpha-1 (I)                                                 | COL1A1  | Collagens         | 1.3 | 0.4  | 6.9 | 2.79 |
| Collagen alpha-1 (I)                                                 | COL1A2  | Collagens         | 1.8 | 0.8  | 9.5 | 3.25 |
| Collagen alpha-1 (VI)                                                | COL6A1  | Collagens         | 0.8 | -0.3 | 1.1 | 0.14 |
| Collagen alpha-2 (VI)                                                | COL6A2  | Collagens         | 0.8 | -0.3 | 1.2 | 0.26 |
| Collagen alpha-3 (VI)                                                | COL6A3  | Collagens         | 0.8 | -0.3 | 1.2 | 0.26 |
| Cysteine-rich motor neuron 1 protein                                 | CRIM1   | ECM Glycoproteins | >10 | >4.0 | 1.0 | 0.00 |
| Extracellular matrix protein 1                                       | ECM1    | ECM Glycoproteins | >10 | >4.0 | 1.0 | 0.00 |
| Elastin microfibril interfacier 1                                    | EMILIN1 | ECM Glycoproteins | 2.6 | 1.4  | 3.3 | 1.72 |
| Fibulin-5                                                            | FBLN5   | ECM Glycoproteins | >10 | >4.0 | >10 | >4.0 |

|                                                                        |         |                   |     |      |     |      |
|------------------------------------------------------------------------|---------|-------------------|-----|------|-----|------|
| Fibrillin-2                                                            | FBN2    | ECM Glycoproteins | >10 | >4.0 | 1.0 | 0.00 |
| Fibrinogen alpha chain                                                 | FGA     | ECM Glycoproteins | 1.0 | 0.0  | 3.0 | 1.58 |
| Fibrinogen beta chain                                                  | FGB     | ECM Glycoproteins | 0.9 | -0.2 | 2.0 | 1.00 |
| Fibrinogen gamma chain                                                 | FGG     | ECM Glycoproteins | 0.8 | -0.3 | 1.4 | 0.49 |
| Insulin-like growth factor-binding protein complex acid labile subunit | IGFALS  | ECM Glycoproteins | >10 | >4.0 | 1.0 | 0.00 |
| Insulin-like growth factor-binding protein 7                           | IGFBP7  | ECM Glycoproteins | >10 | >4.0 | 1.0 | 0.00 |
| Leucine-rich alpha-2-glycoprotein                                      | LRG1    | ECM Glycoproteins | >10 | >4.0 | >10 | >4.0 |
| Lactadherin                                                            | MFGE8   | ECM Glycoproteins | >10 | >4.0 | >10 | >4.0 |
| Periostin                                                              | POSTN   | ECM Glycoproteins | 7.3 | 2.9  | 6.3 | 2.66 |
| Peroxidasin                                                            | PXDN    | ECM Glycoproteins | >10 | >4.0 | >10 | >4.0 |
| Somatomedin-B and thrombospondin type-1 domain-containing protein      | SBSPON  | ECM Glycoproteins | 0.4 | -1.3 | 0.4 | 1.32 |
| Thrombospondin-1                                                       | THBS1   | ECM Glycoproteins | 1.0 | 0.0  | 0.8 | 0.32 |
| Tubulointerstitial nephritis antigen-like                              | TINAGL1 | ECM Glycoproteins | 1.4 | 0.5  | 1.6 | 0.68 |
| Uromodulin                                                             | UMOD    | ECM Glycoproteins | >10 | >4.0 | 1.0 | 0.00 |
| Vitronectin                                                            | VTN     | ECM Glycoproteins | 2.3 | 1.2  | 2.0 | 1.00 |
| von Willebrand factor                                                  | VWF     | ECM Glycoproteins | 7.0 | 2.8  | >10 | >4.0 |
| Biglycan                                                               | BGN     | Proteoglycans     | 1.0 | 0.0  | >10 | >4.0 |
| Lumican                                                                | LUM     | Proteoglycans     | 0.3 | -1.7 | 1.8 | 0.85 |
| Proteoglycan 2                                                         | PRG2    | Proteoglycans     | >10 | >4.0 | >10 | >4.0 |
| Proteoglycan 3                                                         | PRG3    | Proteoglycans     | >10 | >4.0 | 1.0 | 0.00 |

| <b>Matrisome Associated</b>                  |         |                |     |      |     |      |
|----------------------------------------------|---------|----------------|-----|------|-----|------|
| Alpha-2-macroglobulin                        | A2M     | ECM Regulators | 0.7 | -0.5 | 0.5 | 1.00 |
| Angiotensinogen                              | AGT     | ECM Regulators | 1.8 | 0.8  | 0.7 | 0.51 |
| Alpha-1-microglobulin/bikunin precursor      | AMBP    | ECM Regulators | 4.7 | 2.2  | 7.4 | 2.89 |
| Angiopietin-related protein 6                | ANGPTL6 | ECM Regulators | 0.9 | -0.2 | 1.0 | 0.00 |
| Azurocidin                                   | AZU1    | ECM Regulators | >10 | >4.0 | 1.0 | 0.00 |
| Cystatin-A                                   | CSTA    | ECM Regulators | >10 | >4.0 | >10 | >4.0 |
| Cystatin-B                                   | CSTB    | ECM Regulators | 0.4 | -1.3 | 0.4 | 1.32 |
| Cathepsin B                                  | CTSB    | ECM Regulators | >10 | >4.0 | 1.5 | 0.58 |
| Cathepsin C                                  | CTSC    | ECM Regulators | >10 | >4.0 | 1.0 | 0.00 |
| Cathepsin D                                  | CTSD    | ECM Regulators | 1.2 | 0.3  | 3.0 | 1.58 |
| Cathepsin G                                  | CTSG    | ECM Regulators | >10 | >4.0 | 1.0 | 0.00 |
| Cathepsin Z                                  | CTSZ    | ECM Regulators | 2.5 | 1.3  | 2.1 | 1.07 |
| Neutrophil elastase                          | ELANE   | ECM Regulators | >10 | >4.0 | 1.0 | 0.00 |
| Coagulation factor XII                       | F12     | ECM Regulators | >10 | >4.0 | 1.0 | 0.00 |
| Prothrombin                                  | F2      | ECM Regulators | 2.2 | 1.1  | 1.0 | 0.00 |
| Coagulation factor IX                        | F9      | ECM Regulators | 2.2 | 1.1  | 2.3 | 1.20 |
| Histidine-rich glycoprotein                  | HRG     | ECM Regulators | 0.7 | -0.5 | 0.9 | 0.15 |
| HtrA serine peptidase 1                      | HTRA1   | ECM Regulators | 1.0 | 0.0  | >10 | >4.0 |
| Inter-alpha-trypsin inhibitor heavy chain H1 | ITIH1   | ECM Regulators | 1.4 | 0.5  | 0.7 | 0.51 |



|                                                   |            |                |     |      |      |      |
|---------------------------------------------------|------------|----------------|-----|------|------|------|
| Inter-alpha-trypsin inhibitor heavy chain H2      | ITIH2      | ECM Regulators | 1.0 | 0.0  | 0.6  | 0.74 |
| Inter-alpha-trypsin inhibitor heavy chain H4      | ITIH4      | ECM Regulators | 0.6 | -0.7 | 3.0  | 1.58 |
| Inter-alpha-trypsin inhibitor heavy chain H5      | ITIH5      | ECM Regulators | >10 | >4.0 | 1.0  | 0.00 |
| Kininogen-1                                       | KNG1       | ECM Regulators | >10 | >4.0 | 1.0  | 0.00 |
| Apolipoprotein(a)                                 | LPA        | ECM Regulators | >10 | >4.0 | >10  | >4.0 |
| Myeloperoxidase                                   | MPO        | ECM Regulators | >10 | >4.0 | 7.9  | 2.98 |
| Plasminogen                                       | PLG        | ECM Regulators | 8.7 | 3.1  | 4.6  | 2.20 |
| Procollagen-lysine,2-oxoglutarate 5-dioxygenase 3 | PLOD3      | ECM Regulators | >10 | >4.0 | 1.0  | 0.00 |
| Serine protease 23                                | PRSS23     | ECM Regulators | >10 | >4.0 | 1.0  | 0.00 |
| Serum amyloid A-1 protein                         | SAA1       | ECM Regulators | 1.0 | 0.0  | >10  | >4.0 |
| Serpin family A member 1                          | SERPINA1   | ECM Regulators | 0.6 | -0.7 | 1.1  | 0.14 |
| Serpin family A member 3                          | SERPINA3   | ECM Regulators | 1.4 | 0.5  | 2.2  | 1.14 |
| Serpin family B member 1                          | SERPINB1   | ECM Regulators | 0.5 | -1.0 | 0.8  | 0.32 |
| Serpin family B member 12                         | SERPINB1 2 | ECM Regulators | 0.5 | -1.0 | 1.1  | 0.14 |
| Serpin family B member 6                          | SERPINB6   | ECM Regulators | 0.4 | -1.3 | 1.4  | 0.49 |
| Serpin family C member 1                          | SERPINC1   | ECM Regulators | 2.0 | 1.0  | 1.2  | 0.26 |
| Serpin family D member 1                          | SERPIND1   | ECM Regulators | >10 | >4.0 | 1.0  | 0.00 |
| Serpin family F member 1                          | SERPINF1   | ECM Regulators | 1.1 | 0.1  | 1.5  | 0.58 |
| Serpin family F member 2                          | SERPINF2   | ECM Regulators | 1.4 | 0.5  | <0.1 | >4.0 |
| Serpin family G member 1                          | SERPING1   | ECM Regulators | >10 | >4.0 | >10  | >4.0 |

|                                       |          |                         |     |      |      |      |
|---------------------------------------|----------|-------------------------|-----|------|------|------|
| Serpin family H member 1              | SERPINH1 | ECM Regulators          | 0.9 | -0.2 | 0.8  | 0.32 |
| Transglutaminase 2                    | TGM2     | ECM Regulators          | 2.7 | 1.4  | 2.0  | 1.00 |
| Transglutaminase 3                    | TGM3     | ECM Regulators          | >10 | >4.0 | >10  | >4.0 |
| Transthyretin                         | TTR      | ECM Regulators          | 1.8 | 0.8  | 0.3  | 1.74 |
| Annexin A1                            | ANXA1    | ECM-affiliated Proteins | 2.1 | 1.1  | 2.9  | 1.54 |
| Annexin A11                           | ANXA11   | ECM-affiliated Proteins | 0.9 | -0.2 | 1.5  | 0.58 |
| Annexin A2                            | ANXA2    | ECM-affiliated Proteins | 1.1 | 0.1  | 1.2  | 0.26 |
| Annexin A3                            | ANXA3    | ECM-affiliated Proteins | >10 | >4.0 | 1.0  | 0.00 |
| Annexin A4                            | ANXA4    | ECM-affiliated Proteins | 2.1 | 1.1  | 2.5  | 1.32 |
| Annexin A5                            | ANXA5    | ECM-affiliated Proteins | 1.0 | 0.0  | 1.0  | 0.00 |
| Annexin A6                            | ANXA6    | ECM-affiliated Proteins | 1.2 | 0.3  | 1.5  | 0.58 |
| Annexin A7                            | ANXA7    | ECM-affiliated Proteins | >10 | >4.0 | >10  | >4.0 |
| Serum amyloid P-component             | APCS     | ECM-affiliated Proteins | 8.3 | 3.1  | 8.4  | 3.07 |
| Apolipoprotein A-I                    | APOA1    | ECM-affiliated Proteins | 0.6 | -0.7 | 0.8  | 0.32 |
| Apolipoprotein A-IV                   | APOA4    | ECM-affiliated Proteins | 2.7 | 1.4  | 5.2  | 2.38 |
| Apolipoprotein C-III                  | APOC3    | ECM-affiliated Proteins | 1.0 | 0.0  | 1.0  | 0.00 |
| Apolipoprotein E                      | APOE     | ECM-affiliated Proteins | 2.4 | 1.3  | 2.9  | 1.54 |
| Complement C1q subcomponent subunit A | C1QA     | ECM-affiliated Proteins | 0.2 | -2.3 | <0.1 | >4.0 |
| Complement C1q subcomponent subunit B | C1QB     | ECM-affiliated Proteins | 2.1 | 1.1  | <0.1 | >4.0 |
| Complement C1q subcomponent subunit C | C1QC     | ECM-affiliated Proteins | 1.2 | 0.3  | <0.1 | >4.0 |

|                                                                     |       |                         |      |      |     |      |
|---------------------------------------------------------------------|-------|-------------------------|------|------|-----|------|
| Complement C3                                                       | C3    | ECM-affiliated Proteins | 1.4  | 0.5  | 0.9 | 0.15 |
| Complement C5                                                       | C5    | ECM-affiliated Proteins | >10  | >4.0 | >10 | >4.0 |
| Complement C6                                                       | C6    | ECM-affiliated Proteins | >10  | >4.0 | >10 | >4.0 |
| Complement C7                                                       | C7    | ECM-affiliated Proteins | >10  | >4.0 | >10 | >4.0 |
| Complement component C8 alpha chain                                 | C8A   | ECM-affiliated Proteins | >10  | >4.0 | >10 | >4.0 |
| Complement component C8 beta chain                                  | C8B   | ECM-affiliated Proteins | >10  | >4.0 | >10 | >4.0 |
| Complement component C8 gamma chain                                 | C8G   | ECM-affiliated Proteins | >10  | >4.0 | 7.8 | 2.96 |
| Complement component C9                                             | C9    | ECM-affiliated Proteins | 3.8  | 1.9  | 3.8 | 1.93 |
| Complement factor H-related protein 5                               | CFHR5 | ECM-affiliated Proteins | 0.5  | -1.0 | 0.5 | 1.00 |
| Clusterin                                                           | CLU   | ECM-affiliated Proteins | 2.3  | 1.2  | 2.5 | 1.32 |
| Coatomer subunit alpha                                              | COPA  | ECM-affiliated Proteins | 2.1  | 1.1  | 0.9 | 0.15 |
| Chondroitin sulfate proteoglycan 4                                  | CSPG4 | ECM-affiliated Proteins | >10  | >4.0 | 1.0 | 0.00 |
| Dermcidin                                                           | DCD   | ECM-affiliated Proteins | >10  | >4.0 | >10 | >4.0 |
| Dystonin                                                            | DST   | ECM-affiliated Proteins | 1.0  | 0.0  | >10 | >4.0 |
| Guanine nucleotide-binding protein G(s) subunit alpha isoforms XLas | GNAS  | ECM-affiliated Proteins | 0.4  | -1.3 | 0.5 | 1.00 |
| Glucose-6-phosphate isomerase                                       | GPI   | ECM-affiliated Proteins | 0.4  | -1.3 | 0.5 | 1.00 |
| Glutathione peroxidase 3                                            | GPX3  | ECM-affiliated Proteins | <0.1 | >4.0 | 0.4 | 1.32 |
| Gelsolin                                                            | GSN   | ECM-affiliated Proteins | 0.5  | -1.0 | 0.6 | 0.74 |
| Haptoglobin                                                         | HP    | ECM-affiliated Proteins | 1.6  | 0.7  | 1.6 | 0.68 |
| Hemopexin                                                           | HPX   | ECM-affiliated Proteins | 0.6  | -0.7 | 0.5 | 1.00 |

|                                                    |          |                         |     |      |      |      |
|----------------------------------------------------|----------|-------------------------|-----|------|------|------|
| Very-long-chain 3-oxoacyl-CoA reductase            | HSD17B12 | ECM-affiliated Proteins | 0.4 | -1.3 | <0.1 | >4.0 |
| Ig gamma-4 chain C region                          | IGHG4    | ECM-affiliated Proteins | 0.3 | -1.7 | 0.4  | 1.32 |
| Galectin-1                                         | LGALS1   | ECM-affiliated Proteins | 1.2 | 0.3  | 1.5  | 0.58 |
| Galectin-3                                         | LGALS3   | ECM-affiliated Proteins | >10 | >4.0 | 1.0  | 0.00 |
| Galectin-7                                         | LGALS7   | ECM-affiliated Proteins | >10 | >4.0 | 1.0  | 0.00 |
| Lectin, mannose binding 1                          | LMAN1    | ECM-affiliated Proteins | >10 | >4.0 | 1.0  | 0.00 |
| Low-density lipoprotein receptor-related protein 2 | LRP2     | ECM-affiliated Proteins | 1.0 | 0.0  | >10  | >4.0 |
| Lysozyme C                                         | LYZ      | ECM-affiliated Proteins | 0.4 | -1.3 | 0.2  | 2.32 |
| Phosphatidylethanolamine-binding protein 1         | PEBP1    | ECM-affiliated Proteins | 0.3 | -1.7 | 0.6  | 0.74 |
| Peptidyl-prolyl cis-trans isomerase A              | PPIA     | ECM-affiliated Proteins | 0.5 | -1.0 | 0.7  | 0.51 |
| Retinol-binding protein 4                          | RBP4     | ECM-affiliated Proteins | 2.0 | 1.0  | 0.8  | 0.32 |
| Fibroblast growth factor 1                         | FGF1     | Secreted Factors        | 0.4 | -1.3 | <0.1 | >4.0 |
| Filaggrin-2                                        | FLG2     | Secreted Factors        | >10 | >4.0 | >10  | >4.0 |
| Hornerin                                           | HRNR     | Secreted Factors        | 1.6 | 0.7  | 0.5  | 1.00 |
| S100 calcium binding protein A11                   | S100A11  | Secreted Factors        | 0.5 | -1.0 | 0.4  | 1.32 |
| S100 calcium binding protein A16                   | S100A16  | Secreted Factors        | >10 | >4.0 | >10  | >4.0 |
| S100 calcium binding protein A8                    | S100A8   | Secreted Factors        | >10 | >4.0 | >10  | >4.0 |
| S100 calcium binding protein A9                    | S100A9   | Secreted Factors        | >10 | >4.0 | 1.0  | 0.00 |

**Supplemental Table 4. Glomerular Cathepsin and Annexin A3 Staining of Various Diseases**

**Cathepsin C**

| Diagnosis       | # Patients | # glomeruli (range/patient) | #(%) PEC staining | # patients | #(%) PEC Hypertrophy/Proliferation | # patients | #(%) Tuft staining | # patients | Tuft staining area (%) |
|-----------------|------------|-----------------------------|-------------------|------------|------------------------------------|------------|--------------------|------------|------------------------|
| cFSGS           | 8          | 119 (4-34)                  | 111 (93%)         | 8          | 75 (63%)                           | 8          | 47 (51 ± 10%)      | 8          | 13.7 ± 3.1             |
| FSGS-NOS        | 8          | 57 (4-14)                   | 47 (82%)          | 8          | 21 (37%)                           | 5          | 4 (10 ± 4%)        | 4          | 5.4 ± 2.2              |
| FSGS TIP lesion | 7          | 110 (4-34)                  | 110 (100%)        | 7          | 69 (63%)                           | 7          | 20 (19 ± 7%)       | 6          | 7.6 ± 1.9              |
| FSGS perihilar  | 6          | 70 (4-20)                   | 63 (90%)          | 6          | 25 (36%)                           | 5          | 7 (9 ± 4%)         | 3          | 6.9 ± 2.0              |
| MCD             | 9          | 87 (4-17)                   | 83 (95%)          | 9          | 34 (39%)                           | 8          | 0                  | 0          |                        |
| MN              | 9          | 97 (4-14)                   | 87 (90%)          | 7          | 39 (40%)                           | 7          | 6 (10 ± 7%)        | 2          |                        |
| NC              | 6          | 75 (7-26)                   | 69 (92%)          | 6          | 8 (11%)                            | 2          | 0                  | 0          |                        |

**Annexin A3**

|                 |   |            |           |   |          |   |              |   |            |
|-----------------|---|------------|-----------|---|----------|---|--------------|---|------------|
| cFSGS           | 8 | 114 (6-33) | 84 (74%)  | 8 | 59 (52%) | 8 | 26 (29 ± 9%) | 8 | 14.4 ± 2.8 |
| FSGS-NOS        | 9 | 52 (4-13)  | 46 (88%)  | 9 | 30 (58%) | 7 | 0            | 0 | 0          |
| FSGS TIP lesion | 7 | 107 (7-37) | 99 (92%)  | 7 | 52 (48%) | 7 | 5 (9 ± 3%)   | 1 | 4.2 ± 1.1  |
| FSGS perihilar  | 6 | 80 (6-22)  | 68 (85%)  | 6 | 34 (42%) | 6 | 7 (9 ± 5%)   | 3 | 7.9 ± 5.6  |
| MCD             | 8 | 91 (4-24)  | 85 (93%)  | 8 | 35 (38%) | 8 | 1 (2 ± 2%)   | 1 |            |
| MN              | 9 | 111 (6-25) | 106 (95%) | 9 | 53 (48%) | 9 | 3 (3 ± 3%)   | 2 |            |
| NC              | 8 | 117 (4-35) | 112 (96%) | 8 | 32 (27%) | 8 | 0            | 0 |            |

| <b>Supplemental Table 5. Comparison of Urinary Excretion of ECM Proteins</b> |          |                                  |          |
|------------------------------------------------------------------------------|----------|----------------------------------|----------|
| Protein                                                                      | Gene     | log2FC<br>cFSGS:<br>FSGS-<br>NOS | q-value  |
| <b>ECM Proteins More Abundant in cFSGS Urine</b>                             |          |                                  |          |
| Syndecan-4                                                                   | SDC4     | 6.37                             | 9.97E-08 |
| Apolipoprotein(a)                                                            | LPA      | 6.09                             | 1.07E-06 |
| Matrix metalloproteinase-9                                                   | MMP9     | 6.09                             | 2.83E-05 |
| Laminin subunit alpha-3                                                      | LAMA3    | 5.94                             | 2.79E-06 |
| Fibulin-7                                                                    | FBLN7    | 5.91                             | 3.41E-07 |
| Insulin-like growth factor-binding protein 7                                 | IGFBP7   | 5.90                             | 9.97E-08 |
| Latent-transforming growth factor beta-binding protein 4                     | LTBP4    | 5.86                             | 7.78E-08 |
| Hemicentin-1                                                                 | HMCN1    | 5.46                             | 1.93E-07 |
| Epidermal growth factor                                                      | EGF      | 5.42                             | 9.82E-06 |
| Secreted frizzled-related protein 4                                          | SFRP4    | 5.39                             | 9.97E-08 |
| Macrophage colony-stimulating factor 1                                       | CSF1     | 5.34                             | 2.02E-06 |
| C-type lectin domain family 14 member A                                      | CLEC14A  | 5.20                             | 2.42E-06 |
| Fibrillin-1                                                                  | FBN1     | 5.19                             | 2.66E-07 |
| Cathepsin B                                                                  | CTSB     | 5.09                             | 4.84E-06 |
| Collagen alpha-2(I) chain                                                    | COL1A2   | 5.00                             | 2.83E-05 |
| Chondroitin sulfate proteoglycan 4                                           | CSPG4    | 4.95                             | 2.02E-06 |
| Multiple epidermal growth factor-like domains protein 8                      | MEGF8    | 4.95                             | 8.80E-06 |
| Semaphorin-5A                                                                | SEMA5A   | 4.90                             | 1.21E-04 |
| Brevican core protein                                                        | BCAN     | 4.83                             | 3.76E-05 |
| Stromal cell-derived factor 1                                                | CXCL12   | 4.75                             | 2.42E-06 |
| Serine protease HTRA1                                                        | HTRA1    | 4.74                             | 5.66E-04 |
| Growth/differentiation factor 15                                             | GDF15    | 4.66                             | 4.84E-06 |
| Collagen alpha-2(VI) chain                                                   | COL6A2   | 4.62                             | 5.17E-07 |
| Mucin-like protein 1                                                         | MUCL1    | 4.60                             | 2.94E-04 |
| Basement membrane-specific heparan sulfate proteoglycan core protein         | HSPG2    | 4.58                             | 4.82E-07 |
| Hemicentin-2                                                                 | HMCN2    | 4.57                             | 3.57E-07 |
| Galectin-9                                                                   | LGALS9   | 4.47                             | 3.35E-04 |
| ADAMTS-like protein 2                                                        | ADAMTSL2 | 4.46                             | 1.57E-04 |
| Collagen alpha-1(VI) chain                                                   | COL6A1   | 4.41                             | 6.19E-06 |
| Thrombospondin-1                                                             | THBS1    | 4.36                             | 3.05E-06 |
| Cartilage intermediate layer protein 1                                       | CILP     | 4.32                             | 3.41E-07 |
| Fibulin-5                                                                    | FBLN5    | 4.25                             | 4.84E-06 |
| Agrin                                                                        | AGRN     | 4.14                             | 7.10E-04 |
| Cartilage intermediate layer protein 2                                       | CILP2    | 4.10                             | 2.02E-06 |

|                                                            |          |      |          |
|------------------------------------------------------------|----------|------|----------|
| Collagen alpha-1(XV) chain                                 | COL15A1  | 3.97 | 6.53E-05 |
| Fibronectin                                                | FN1      | 3.94 | 2.42E-06 |
| Latent-transforming growth factor beta-binding protein 1   | LTBP1    | 3.93 | 5.71E-03 |
| Protein S100-A6                                            | S100A6   | 3.85 | 2.02E-04 |
| Thrombospondin-4                                           | THBS4    | 3.82 | 4.84E-06 |
| Protein S100-A11                                           | S100A11  | 3.61 | 8.72E-04 |
| Follistatin-related protein 1                              | FSTL1    | 3.60 | 1.08E-04 |
| C-C motif chemokine 25                                     | CCL25    | 3.59 | 1.67E-03 |
| Dermatopontin                                              | DPT      | 3.58 | 2.83E-05 |
| Fibulin-1                                                  | FBLN1    | 3.57 | 3.65E-05 |
| Mucin-1                                                    | MUC1     | 3.57 | 1.32E-04 |
| Collagen alpha-1(I) chain                                  | COL1A1   | 3.52 | 9.38E-04 |
| Fibulin-2                                                  | FBLN2    | 3.50 | 7.10E-04 |
| Lithostathine-1-alpha                                      | REG1A    | 3.50 | 4.13E-03 |
| Collagen alpha-2(IV) chain                                 | COL4A2   | 3.50 | 2.02E-06 |
| Kininogen-1                                                | KNG1     | 3.50 | 8.80E-06 |
| Extracellular sulfatase Sulf-2                             | SULF2    | 3.48 | 1.73E-03 |
| Neuroserpin                                                | SERPINI1 | 3.47 | 8.54E-06 |
| EGF-containing fibulin-like extracellular matrix protein 1 | EFEMP1   | 3.46 | 1.78E-05 |
| Urokinase-type plasminogen activator                       | PLAU     | 3.46 | 1.11E-03 |
| Cathepsin L1                                               | CTSL     | 3.45 | 2.90E-06 |
| Bone marrow proteoglycan                                   | PRG2     | 3.32 | 2.83E-05 |
| Angiopoietin-related protein 2                             | ANGPTL2  | 3.30 | 5.97E-05 |
| Nidogen-1                                                  | NID1     | 3.29 | 7.45E-04 |
| Tetranectin                                                | CLEC3B   | 3.28 | 1.72E-05 |
| Mannan-binding lectin serine protease 2                    | MASP2    | 3.27 | 1.17E-04 |
| Phosphoinositide-3-kinase-interacting protein 1            | PIK3IP1  | 3.22 | 7.65E-04 |
| Cystatin-M                                                 | CST6     | 3.16 | 5.76E-03 |
| Proteoglycan 4                                             | PRG4     | 3.13 | 4.43E-03 |
| Plasma serine protease inhibitor                           | SERPINA5 | 3.11 | 3.47E-04 |
| Hyaluronidase-1                                            | HYAL1    | 3.11 | 2.34E-03 |
| Laminin subunit alpha-4                                    | LAMA4    | 3.08 | 2.94E-04 |
| Procollagen C-endopeptidase enhancer 1                     | PCOLCE   | 3.04 | 1.09E-05 |
| Plexin domain-containing protein 2                         | PLXDC2   | 3.02 | 4.76E-05 |
| Protein AMBP                                               | AMBP     | 2.98 | 1.66E-04 |
| Cartilage oligomeric matrix protein                        | COMP     | 2.94 | 2.82E-04 |
| Collectin-12                                               | COLEC12  | 2.74 | 6.86E-03 |
| Osteopontin                                                | SPP1     | 2.73 | 1.57E-04 |
| Collagen alpha-3(VI) chain                                 | COL6A3   | 2.62 | 0.0124   |
| Trypsin-1                                                  | PRSS1    | 2.53 | 1.38E-03 |

|                                                            |          |       |          |
|------------------------------------------------------------|----------|-------|----------|
| Metalloproteinase inhibitor 2                              | TIMP2    | 2.48  | 1.47E-03 |
| Cathepsin Z                                                | CTSZ     | 2.39  | 5.76E-03 |
| Multimerin-2                                               | MMRN2    | 2.30  | 0.0104   |
| EGF-containing fibulin-like extracellular matrix protein 2 | EFEMP2   | 2.24  | 5.79E-05 |
| Elafin                                                     | PI3      | 2.17  | 2.02E-03 |
| Plasma protease C1 inhibitor                               | SERPING1 | 2.07  | 0.0126   |
| Insulin-like growth factor-binding protein 2               | IGFBP2   | 2.06  | 2.57E-04 |
| Glypican-3                                                 | GPC3     | 1.97  | 2.81E-03 |
| Cathepsin D                                                | CTSD     | 1.95  | 2.13E-03 |
| Cystatin-C                                                 | CST3     | 1.94  | 0.0201   |
| WNT1-inducible-signaling pathway protein 2                 | WISP2    | 1.82  | 0.0279   |
| Cathepsin C                                                | CTSC     | 1.77  | 0.0258   |
| Latent-transforming growth factor beta-binding protein 2   | LTBP2    | 1.74  | 0.0311   |
| Mucin-20                                                   | MUC20    | 1.73  | 0.0126   |
| Tenascin-X                                                 | TNXB     | 1.59  | 2.59E-03 |
| Cystatin-A                                                 | CSTA     | 1.47  | 0.0771   |
| Carboxypeptidase N subunit 2                               | CPN2     | 1.32  | 0.0465   |
| Insulin-like growth factor-binding protein 6               | IGFBP6   | 1.28  | 8.21E-03 |
| Fibrinogen alpha chain                                     | FGA      | 1.21  | 0.3079   |
| Insulin-like growth factor II                              | IGF2     | 1.20  | 0.0468   |
| SPARC-like protein 1                                       | SPARCL1  | 1.07  | 0.0315   |
| Vitronectin                                                | VTN      | 0.99  | 0.1494   |
| Inter-alpha-trypsin inhibitor heavy chain H4               | ITIH4    | 0.75  | 0.3079   |
| Hepatocyte growth factor activator                         | HGFAC    | 0.64  | 0.2689   |
| Protein S100-A9                                            | S100A9   | 0.50  | 0.6984   |
| Prothrombin                                                | F2       | 0.36  | 0.5848   |
| Lysosomal protective protein                               | CTSA     | 0.27  | 0.7104   |
| Protein S100-A8                                            | S100A8   | 0.09  | 0.9480   |
| <b>ECM Proteins More Abundant in FSGS-NOS Urine</b>        |          |       |          |
| Coagulation factor XII                                     | F12      | -0.04 | 0.9480   |
| Leucine-rich alpha-2-glycoprotein                          | LRG1     | -0.09 | 0.9353   |
| Cornulin                                                   | CRNN     | -0.14 | 0.9350   |
| Lumican                                                    | LUM      | -0.43 | 0.5753   |
| Serpin B4                                                  | SERPINB4 | -1.10 | 0.3059   |
| Extracellular matrix protein 1                             | ECM1     | -1.41 | 0.0157   |
| Hemopexin                                                  | HPX      | -1.56 | 0.0774   |
| Kallistatin                                                | SERPINA4 | -1.92 | 0.0888   |
| Plasminogen                                                | PLG      | -1.96 | 3.76E-03 |
| Hyaluronan-binding protein 2                               | HABP2    | -2.24 | 8.14E-03 |



|                                                                        |          |       |          |
|------------------------------------------------------------------------|----------|-------|----------|
| Insulin-like growth factor-binding protein complex acid labile subunit | IGFALS   | -2.41 | 1.15E-03 |
| Thyroxine-binding globulin                                             | SERPINA7 | -2.43 | 2.98E-03 |
| Histidine-rich glycoprotein                                            | HRG      | -2.57 | 0.0435   |
| Inter-alpha-trypsin inhibitor heavy chain H1                           | ITIH1    | -2.61 | 0.0157   |
| Fibrinogen beta chain                                                  | FGB      | -2.65 | 0.0223   |
| Alpha-2-antiplasmin                                                    | SERPINF2 | -2.72 | 3.73E-04 |
| Corticosteroid-binding globulin                                        | SERPINA6 | -2.77 | 1.38E-03 |
| Alpha-1-antichymotrypsin                                               | SERPINA3 | -2.77 | 6.04E-05 |
| Coagulation factor IX                                                  | F9       | -2.87 | 5.35E-03 |
| Alpha-2-macroglobulin                                                  | A2M      | -2.91 | 7.12E-03 |
| Angiotensinogen                                                        | AGT      | -3.05 | 3.61E-03 |
| Pigment epithelium-derived factor                                      | SERPINF1 | -3.13 | 0.0129   |
| Inter-alpha-trypsin inhibitor heavy chain H2                           | ITIH2    | -3.31 | 3.47E-04 |
| Fibrinogen gamma chain                                                 | FGG      | -3.42 | 3.84E-03 |
| Heparin cofactor 2                                                     | SERPIND1 | -3.97 | 8.69E-03 |
| Antithrombin-III                                                       | SERPINC1 | -4.03 | 1.09E-05 |
| Alpha-1-antitrypsin                                                    | SERPINA1 | -4.51 | 1.65E-06 |
| Complement C3                                                          | C3       | -4.88 | 5.47E-04 |

| <b>Supplemental Table 6. Peptides derived from ECM Proteins Showing Increased Urine Excretion</b> |                                  |                                        |
|---------------------------------------------------------------------------------------------------|----------------------------------|----------------------------------------|
| Gene                                                                                              | Number of peptides (FSGS vs MCD) | Number of peptides (cFSGS vs FSGS-NOS) |
| ANXA1                                                                                             | 1                                | 0                                      |
| COL18A1                                                                                           | 2                                | 0                                      |
| COL1A1                                                                                            | 2                                | 2                                      |
| COL1A2                                                                                            | 3                                | 2                                      |
| COL4A1                                                                                            | 1                                | 0                                      |
| COL5A2                                                                                            | 2                                | 1                                      |
| F2                                                                                                | 1                                | 1                                      |
| FGA                                                                                               | 6                                | 2                                      |
| HPX                                                                                               | 4                                | 2                                      |
| IGF2                                                                                              | 2                                | 2                                      |
| INS                                                                                               | 0                                | 2                                      |
| KNG1                                                                                              | 1                                | 0                                      |
| LRG1                                                                                              | 0                                | 1                                      |
| LTBP4                                                                                             | 1                                | 1                                      |
| MASP2                                                                                             | 6                                | 1                                      |
| MEP1A                                                                                             | 1                                | 1                                      |
| MFAP5                                                                                             | 0                                | 1                                      |
| NID1                                                                                              | 2                                | 1                                      |
| PIK3IP1                                                                                           | 1                                | 1                                      |
| PLG                                                                                               | 5                                | 1                                      |
| S100A9                                                                                            | 2                                | 0                                      |
| SERPINA1                                                                                          | 11                               | 10                                     |
| SERPINA3                                                                                          | 1                                | 0                                      |
| SERPINC1                                                                                          | 1                                | 0                                      |
| SPP1                                                                                              | 6                                | 3                                      |

Patients with FSGS-NOS were 3 white females with mean  $\pm$  SEM serum creatinine of  $0.96 \pm 0.27$  mg/dl and mean  $\pm$  SEM urine protein/creatinine of  $7463 \pm 1205$  mg/gm. Patients with cFSGS were 2 males and 1 female, 2 of which were black with mean  $\pm$  SEM serum creatinine of  $1.59 \pm 0.67$  mg/dl and mean  $\pm$  SEM urine protein/creatinine of  $7558 \pm 532$  mg/gm.

| <b>Supplemental Table 7. Proteases Associated with Urine ECM Peptides</b> |                                                                                       |                                                                         |
|---------------------------------------------------------------------------|---------------------------------------------------------------------------------------|-------------------------------------------------------------------------|
| Protease Group                                                            | Number of peptides with increased urine excretion in FSGS or cFSGS (percent of total) | Peptides with similar urine excretion between groups (percent of total) |
| <b>FSGS vs MCD</b>                                                        |                                                                                       |                                                                         |
|                                                                           | Total = 66                                                                            | Total = 299                                                             |
| matrix metalloproteinases (MMP)                                           | 13 (19.7)                                                                             | 105 (35.1)                                                              |
| cathepsins (CTS)                                                          | 7 (10.1)                                                                              | 29 (9.7)                                                                |
| MMP + CTS                                                                 | 1 (1.5)                                                                               | 17 (5.7)                                                                |
| MMP + misc                                                                | 3 (4.5)                                                                               | 10 (3.3)                                                                |
| Plasminogen (PLG)                                                         | 0 (0)                                                                                 | 18 (6.0)                                                                |
| proprotein convertase subtilisin/kexin (PCSK) + misc                      | 6 (9.1)                                                                               | 2 (0.7)                                                                 |
| misc                                                                      | 2 (3)                                                                                 | 10 (3.3)                                                                |
| All Proteases                                                             | 32 (48.5)                                                                             | 191 (63.9)                                                              |
| <b>cFSGS vs FSGS-NOS</b>                                                  |                                                                                       |                                                                         |
|                                                                           | Total = 35                                                                            | Total = 330                                                             |
| MMP                                                                       | 9 (25.7)                                                                              | 109 (33)                                                                |
| CTS                                                                       | 4 (11.4)                                                                              | 32 (9.7)                                                                |
| MMP + CTS                                                                 | 1 (2.8)                                                                               | 17 (5.2)                                                                |
| MMP + misc                                                                | 0 (0)                                                                                 | 13 (3.9)                                                                |
| PLG                                                                       | 0 (0)                                                                                 | 18 (5.4)                                                                |
| PCSK + misc                                                               | 6 (17.1)                                                                              | 2 (0.6)                                                                 |
| misc                                                                      | 1 (2.8)                                                                               | 11 (3.3)                                                                |
| All Proteases                                                             | 21 (60)                                                                               | 202 (61.2)                                                              |
